# Supplementary material
Source: PubMed Central journal article supplement (PMC3148196)

**Highly Selective Coupling of Alkenes and Aldehydes Catalyzed by  
NHC–Ni–P(OPh)<sub>3</sub>: Synergy Between a Strong  $\sigma$ -Donor and a Strong  $\pi$ -Acceptor**

Chun–Yu Ho and Timothy F. Jamison \*

*Department of Chemistry, Massachusetts Institute of Technology, Cambridge, MA 02139*

**Supporting Information**

*Experimental Procedures, Analytical and Spectroscopic Data for Compounds*

Table of Contents

|   |                                                                                                            |     |
|---|------------------------------------------------------------------------------------------------------------|-----|
| 1 | General Experimental Procedures                                                                            | S2  |
| 2 | Structures of the Coupling Products                                                                        | S3  |
| 3 | Procedure for the Evaluation of Additives in Ni-IPr-Mediated Alkene-Aldehyde Coupling Reactions (Table 1). | S4  |
| 4 | General Procedure for IPr-Ni-P(OPh) <sub>3</sub> Catalyzed Alkene-Aldehyde Coupling Reactions (Table 2).   | S5  |
| 5 | Compound Characterization Data                                                                             | S6  |
| 6 | NMR Spectra                                                                                                | S22 |

## General Experimental Procedures.

Unless otherwise indicated, all reactions were performed under an oxygen-free atmosphere of argon with rigid exclusion of moisture from reagents and glassware. All alkenes and aldehydes were used as received without further purification. Diphenylcyclohexylphosphine, ethyl diphenylphosphinite and diethyl phenylphosphonite were purchased from Aldrich Chemical Co. and were used as received. Other phosphorous ligands, 1,3-Bis(2,6-di-isopropylphenyl)imidazol-2-ylidene (IPr) and Bis(cyclooctadienyl) nickel(0) ( $\text{Ni}(\text{cod})_2$ ) were purchased from Strem Chemicals, Inc., stored under nitrogen atmosphere and used without further purification. Triethylamine, toluene and Triethylsilyl trifluoromethanesulfonate (TESOTf) were distilled over calcium hydride before use.

Analytical thin layer chromatography (TLC) was performed using EM Science silica gel 60 F254 plates. The developed chromatogram was analyzed by UV lamp (254 nm), ethanolic phosphomolybdic acid (PMA) or potassium permanganate ( $\text{KMnO}_4$ ). Liquid chromatography was performed using a forced flow (flash chromatography) of the indicated solvent system on Silicycle Silica Gel (230–400 mesh).  $^1\text{H}$  and  $^{13}\text{C}$  NMR spectra were recorded on Bruker 400 MHz spectrometers in  $\text{CDCl}_3$ . Chemical shifts in  $^1\text{H}$  NMR spectra are reported in ppm on the  $\delta$  scale from residual chloroform (7.27 ppm). Chemical shifts of  $^{13}\text{C}$  NMR spectra are reported in ppm from the central peak of  $\text{CDCl}_3$  (77.23 ppm) on the  $\delta$  scale. Infrared (IR) spectra were recorded on a Perkin–Elmer 2000 FT–IR. High resolution mass spectra (HRMS) were obtained on a Bruker Daltonics APEXII 3 Tesla Fourier Transform Mass Spectrometer by Dr. Li Li of the Massachusetts Institute of Technology, Department of Chemistry Instrument Facility.

**Figure 1.** Structures of the Coupling Products

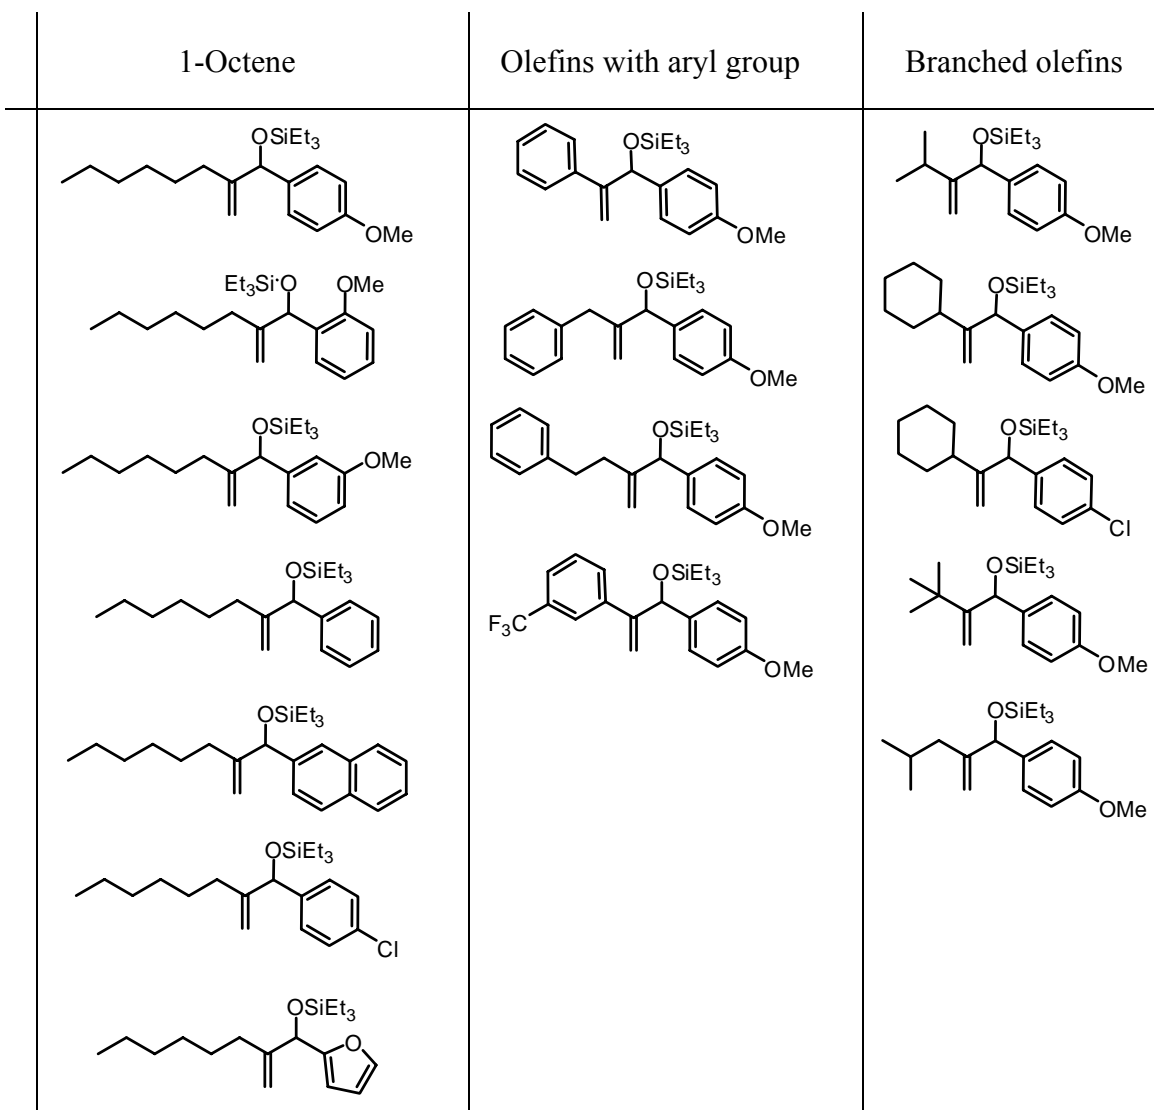

With an additional double bond

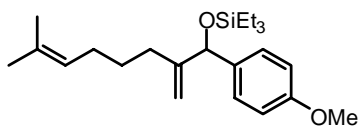

**Procedure for the Evaluation of Additives in Ni-IPr Mediated Alkene-Aldehyde Coupling Reactions (Table 1).**

1,3-Bis(2,6-di-isopropylphenyl)imidazol-2-ylidene (IPr) (0.05 mmol, 20 mol%) and Ni(cod)<sub>2</sub> (0.05 mmol, 20 mol%) were added to an oven-dried test tube equipped with a stir bar in glove box. The tube was sealed with a septum, brought out of the glove box and connected to an argon line. The catalyst mixture was dissolved in degassed toluene (3.0 mL) under argon and stirred 1 h at room temperature. Vinylcyclohexene (0.25 mL), triethylamine (1.5 mmol, 600 mol%), *p*-anisaldehyde (0.25 mmol, 100 mol%), and the additive (0.05 mmol, 20 mol%) were added sequentially to the reaction mixture. Triethylsilyltriflate (0.44 mmol, 175 mol%) was added to the reaction mixture dropwise and the mixture was stirred 21 h at room temperature. The mixture was diluted with ether (5 mL) and was allowed to stir 30 mins in open air. The mixture was filtered through a short plug of silica gel and rinsed with 20% ethyl acetate/hexane (50 mL). The solvent was removed under reduced pressure, purification via flash chromatography on silica gel (1% ethyl acetate in hexane, unless otherwise indicated) afforded the coupling product.

## General Procedure for IPr-Ni-P(OPh)<sub>3</sub> Catalyzed Alkene-Aldehyde Coupling Reactions (Table 2).

1,3-Bis(2,6-di-isopropylphenyl)imidazol-2-ylidene (IPr) (0.075 mmol, 30 mol%) and Ni(cod)<sub>2</sub> (0.075 mmol, 30 mol%) were added to an oven-dried test tube equipped with a stir bar in glove box. The tube was sealed with a septum, brought out of the glove box, and connected to an argon line. The catalyst mixture was dissolved in degassed toluene (3 mL) under argon and stirred at room temperature for 1 hour. The alkene (1.25 mmol, 500 mol% or indicated amount in Table 2), triethylamine (1.5 mmol, 600 mol%), aldehyde (0.25 mmol, 100 mol%), triphenylphosphite (0.11 mmol, 45 mol%) were then added sequentially to the reaction mixture. (When a solid aldehyde was used, the aldehyde was added as a stock solution in toluene.) Triethylsilyltriflate (0.44 mmol, 175 mol%) was added to the reaction mixture dropwise, and the mixture was stirred 48 h at 35 °C. After cooling to room temperature, the mixture was diluted with ether (5 mL) and was allowed to stir 30 mins in open air. The mixture was then filtered through a short plug of silica gel and rinsed with 20% ethyl acetate/hexane (50 mL). The solvent was removed under reduced pressure, and purification via flash chromatography on silica gel (1% ethyl acetate in hexane, unless otherwise indicated) afforded the coupling product.

In some cases, the coupling product coeluted with the starting materials, and characterization data of the corresponding alcohol was reported instead. The corresponding alcohol product was obtained by treating the mixture with 1 M TBAF in THF at 0 °C and allowed to stir 2 h at room temperature, followed by flash column chromatography on silica (15% ethyl acetate in hexane, or 80% DCM in hexane).

## Compound Characterization Data

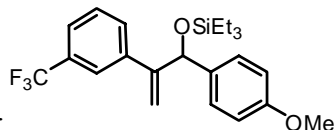

Side Product from *m*-CF<sub>3</sub> styrene as additive:

Table 1, entry 2. Yield: < 5%.

Characterization data of the corresponding alcohol:

<sup>1</sup>H NMR (400 MHz, CDCl<sub>3</sub>, δ): 7.59 (s, 1H), 7.50–7.46 (m, 2H), 7.39–7.36 (m, 1H), 7.31 (d, *J* = 8.6 Hz, 2H), 6.87 (d, *J* = 8.6 Hz, 2H), 5.68 (d, *J* = 3.7 Hz, 1H), 5.63 (t, *J* = 1.1 Hz, 1H), 5.67 (s, 1H), 3.81 (s, 3H), 2.07 (d, *J* = 3.7 Hz, 1H).

<sup>13</sup>C NMR (100 MHz, CDCl<sub>3</sub>, δ): 159.6, 149.5, 140.4, 133.6, 130.6, 130.5, 128.9, 128.5, 124.5, 124.0, 115.3, 114.2, 75.6, 55.5.

IR (NaCl, thin film): 3398, 2925, 2852, 1669, 1611, 1587, 1513, 1490, 1465, 1442, 1332, 1251, 1167, 1125, 1074, 1034, 905, 832, 807, 701, 666.

HRMS–ESI (*m/z*): [M+Na]<sup>+</sup> calcd for C<sub>17</sub>H<sub>15</sub>F<sub>3</sub>O<sub>2</sub>Na, 331.0916; found, 331.0924.

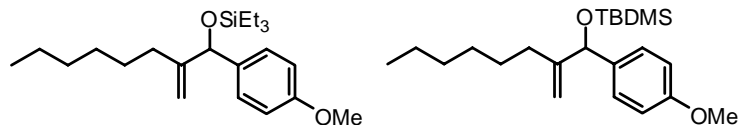

Table 2, entry 1 and 2:

The standard procedure was followed, except only 1.5 equiv of alkene was used. Yield: 91%.

Characterization data of the corresponding alcohol:

$^1\text{H}$  NMR (400 MHz,  $\text{CDCl}_3$ ,  $\delta$ ): 7.28 (d,  $J = 8.7$  Hz, 2H); 6.89 (d,  $J = 8.7$  Hz, 2H); 5.27 (s, 1H); 5.09 (s, 1H); 4.97 (s, 1H); 3.81 (s, 3H); 2.06 (brs, 1H); 1.97–1.75 (m, 2H); 1.48–1.29 (m, 2H); 1.28–1.23 (m, 6H); 0.87 (t,  $J = 7.1$  Hz, 3H).

$^{13}\text{C}$  NMR (100 MHz,  $\text{CDCl}_3$ ,  $\delta$ ): 159.3, 151.5, 134.6, 128.2, 113.9, 109.2, 76.9, 55.4, 32.2, 31.9, 29.3, 27.9, 22.8, 14.3.

IR (NaCl, thin film): 3405, 2955, 2928, 2857, 1647, 1611, 1586, 1511, 1465, 1303, 1248, 1172, 1109, 1037, 903, 830, 779.

HRMS–ESI (m/z):  $[\text{M}+\text{Na}]^+$  calcd for  $\text{C}_{16}\text{H}_{24}\text{O}_2\text{Na}$ , 271.1669; found, 271.1679.

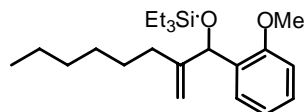

Table 2, entry 3:

The standard procedure was followed. Yield: 60%.

Characterization data of the corresponding alcohol:

$^1\text{H}$  NMR (400 MHz,  $\text{CDCl}_3$ ,  $\delta$ ): 7.31–7.26 (m, 2H), 6.98 (dt,  $J = 7.5, 1.0$  Hz, 1H); 6.92 (d,  $J = 8.1$  Hz, 2H); 5.44 (d,  $J = 5.9$  Hz, 1H); 5.16 (s, 1H); 4.99 (t,  $J = 1.3$  Hz, 1H); 3.87 (s, 3H); 2.63 (d,  $J = 6.0$  Hz, 1H); 2.20–1.90 (m, 2H); 1.50–1.42 (m, 2H); 1.32–1.24 (m, 6H); 0.89 (t,  $J = 7.0$  Hz, 3H).

$^{13}\text{C}$  NMR (100 MHz,  $\text{CDCl}_3$ ,  $\delta$ ): 157.3, 150.9, 130.6, 128.9, 128.2, 121.0, 110.9, 109.5, 72.4, 55.6, 33.1, 31.9, 29.3, 28.1, 22.8, 14.3.

IR (NaCl, thin film): 3365, 2928, 2857, 1653, 1596, 1559, 1491, 1473, 1244, 1029, 904, 813, 753, 691.

HRMS–ESI ( $m/z$ ):  $[\text{M}+\text{Na}]^+$  calcd for  $\text{C}_{16}\text{H}_{24}\text{O}_2\text{Na}$ , 271.1669; found, 271.1672.



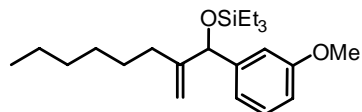

Table 2, entry 4:

The standard procedure was followed. Yield: 84%.

Characterization data of the corresponding alcohol:

$^1\text{H}$  NMR (400 MHz,  $\text{CDCl}_3$ ,  $\delta$ ): 7.29–7.25 (m, 1H); 6.96–6.93 (m, 2H); 6.85–6.82 (m, 1H), 5.26 (s, 1H); 5.14 (s, 1H); 4.98 (s, 1H); 3.82 (s, 3H); 1.98–1.81 (m, 2H); 1.94 (d,  $J$  = 3.7 Hz, 1H); 1.44–1.37 (m, 2H); 1.29–1.20 (m, 6H); 0.86 (t,  $J$  = 7.1 Hz, 3H).

$^{13}\text{C}$  NMR (100 MHz,  $\text{CDCl}_3$ ,  $\delta$ ): 159.9, 151.2, 144.1, 129.6, 119.3, 113.4, 112.3, 109.9, 77.5, 55.4, 32.0, 31.9, 29.3, 27.9, 22.8, 14.3.

IR (NaCl, thin film): 3403, 2927, 2857, 1684, 1636, 1653, 1602, 1559, 1540, 1507, 1489, 1457, 1437, 1260, 1156, 1042.

HRMS–ESI ( $m/z$ ):  $[\text{M}+\text{Na}]^+$  calcd for  $\text{C}_{16}\text{H}_{24}\text{O}_2\text{Na}$ , 271.1669; found, 271.1680.

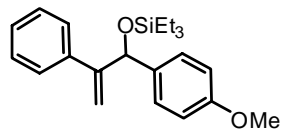

Table 2, entry 5:

The standard procedure was followed. Yield: 58%.

Characterization data of the corresponding alcohol:

<sup>1</sup>H NMR (400 MHz, CDCl<sub>3</sub>, δ): 7.35–7.22 (m, 7H); 6.86 (d, *J* = 8.7 Hz, 2H); 5.68 (s, 1H); 5.53 (brs, 2H); 3.80 (s, 3H); 2.04 (brs, 1H).

<sup>13</sup>C NMR (100 MHz, CDCl<sub>3</sub>, δ): 159.4, 150.6, 139.6, 134.2, 128.6, 128.5, 127.8, 127.1, 114.1, 113.8, 75.6, 55.5.

IR (NaCl, thin film): 3406, 2922, 2852, 1611, 1552, 1512, 1462, 1248, 1173, 1027, 832, 666.

HRMS–ESI (*m/z*): [M+Na]<sup>+</sup> calcd for C<sub>16</sub>H<sub>16</sub>O<sub>2</sub>Na, 263.1043; found, 263.1053.

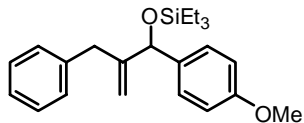

Table 2, entry 6:

The standard procedure was followed, except only 1.5 equiv of alkene was used. Yield: 74%.

Characterization data of the corresponding alcohol:

$^1\text{H}$  NMR (400 MHz,  $\text{CDCl}_3$ ,  $\delta$ ): 7.31–7.27 (m, 4H); 7.23–7.22 (m, 1H), 7.13 (d,  $J = 7.0$  Hz, 1H); 6.91 (d,  $J = 8.6$  Hz, 2H); 5.37 (s, 1H); 5.06 (s, 1H); 4.91 (s, 1H); 3.84 (s, 3H); 3.36 (d,  $J = 15.5$  Hz, 1H); 3.11 (d,  $J = 15.5$  Hz, 1H); 1.93 (brs, 1H).

$^{13}\text{C}$  NMR (100 MHz,  $\text{CDCl}_3$ ,  $\delta$ ): 159.5, 150.8, 139.4, 134.2, 129.4, 128.5, 128.4, 126.4, 114.1, 111.9, 76.1, 55.5, 39.4.

IR (NaCl, thin film): 3406, 2959, 2923, 2852, 1642, 1511, 1463, 1378, 1250, 1159, 1071, 666.

HRMS–ESI ( $m/z$ ):  $[\text{M}+\text{Na}]^+$  calcd for  $\text{C}_{17}\text{H}_{18}\text{O}_2\text{Na}$ , 277.1199; found, 277.1209.

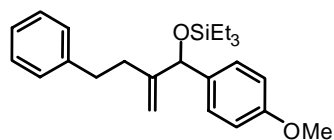

Table 2, entry 7:

The standard procedure was followed. Yield: 87%.

Characterization data of the corresponding alcohol:

$^1\text{H}$  NMR (400 MHz,  $\text{CDCl}_3$ ,  $\delta$ ): 7.39–7.15 (m, 5H); 7.13 (d,  $J = 1.3$  Hz, 2H), 6.88 (d,  $J = 6.8$  Hz, 2H); 5.34 (s, 1H); 5.12 (s, 1H); 5.05 (s, 1H); 3.82 (s, 3H); 2.72 (t,  $J = 8.1$  Hz, 1H); 2.31 (m, 2H), 1.85 (brs, 1H).

$^{13}\text{C}$  NMR (100 MHz,  $\text{CDCl}_3$ ,  $\delta$ ): 159.4, 150.7, 149.2, 142.1, 134.3, 128.5, 128.2, 126.0, 114.0, 110.1, 77.1, 55.5, 34.5, 33.8.

IR (NaCl, thin film): 3420, 2925, 1611, 1511, 1454, 1248, 1172, 1034, 831, 665.

HRMS–ESI ( $m/z$ ):  $[\text{M}+\text{Na}]^+$  calcd for  $\text{C}_{18}\text{H}_{20}\text{O}_2\text{Na}$ , 291.1356; found, 291.1358.

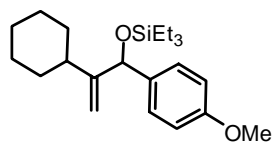

Table 2, entry 8:

The standard procedure was followed. Yield: 96%.

Characterization data of the corresponding alcohol:

<sup>1</sup>H NMR (400 MHz, CDCl<sub>3</sub>, δ): 7.24 (d, *J* = 8.7 Hz, 2H); 6.82 (d, *J* = 8.7 Hz, 2H); 5.21 (s, 1H); 5.08 (s, 1H); 4.88 (s, 1H); 3.80 (s, 3H); 1.74–1.53 (m, 6H); 1.22–1.02 (m, 2H); 0.90 (t, *J* = 8.0 Hz, 9H); 0.56 (dq, *J* = 8.0, 1.5 Hz, 6H).

<sup>13</sup>C NMR (100 MHz, CDCl<sub>3</sub>, δ): 158.8, 157.9, 136.0, 128.1, 113.4, 107.8, 77.1, 55.4, 39.7, 34.5, 33.5, 27.2, 27.0, 26.6, 7.1, 5.1.

IR (NaCl, thin film): 3425, 2925, 2852, 1643, 1511, 1462, 1247, 1171, 1073, 890, 855, 665.

HRMS–ESI (*m/z*): [M+Na]<sup>+</sup> calcd for C<sub>22</sub>H<sub>36</sub>O<sub>2</sub>SiNa, 383.2377; found, 383.2387.

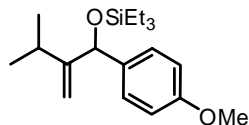

Table 2, entry 9:

The standard procedure was followed, except the reaction was carried out in sealed tube and using 1 mL of alkene. Yield: 93%.

Characterization data of the corresponding alcohol:

$^1\text{H}$  NMR (400 MHz,  $\text{CDCl}_3$ ,  $\delta$ ): 7.30 (d,  $J = 8.6$  Hz, 2H), 6.89 (d,  $J = 8.6$  Hz, 2H), 5.29 (s, 1H), 5.17 (d,  $J = 3.3$  Hz, 1H), 5.06 (s, 1H), 3.83 (s, 3H), 2.11 (m, 1H), 1.91 (brs, 1H), 1.01 (d,  $J = 6.8$  Hz, 3H), 1.00 (d,  $J = 6.8$  Hz, 3H).

$^{13}\text{C}$  NMR (100 MHz,  $\text{CDCl}_3$ ,  $\delta$ ): 159.4, 158.1, 134.8, 128.5, 114.0, 107.3, 76.3, 55.4, 30.4, 23.4, 22.5.

IR (NaCl, thin film): 3395, 2960, 2930, 2871, 1644, 1611, 1586, 1511, 1463, 1303, 1249, 1173, 1096, 1035, 904, 853, 831.

HRMS–ESI ( $m/z$ ):  $[\text{M}+\text{Na}]^+$  calcd for  $\text{C}_{13}\text{H}_{18}\text{O}_2\text{Na}$ , 229.1199; found, 229.1206.

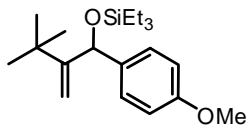

Table 2, entry 10:

The standard procedure was followed, except the reaction was carried out in sealed tube and using 40 mol% of Ni(cod)<sub>2</sub>, IPr and 60 mol% of P(OPh)<sub>3</sub>. Yield: 13%.

Characterization data of the corresponding alcohol:

<sup>1</sup>H NMR (400 MHz, CDCl<sub>3</sub>, δ): 7.34 (d, *J* = 8.4 Hz, 2H), 6.89 (d, *J* = 8.4 Hz, 2H), 5.39 (d, *J* = 4.1 Hz, 1H), 5.27 (s, 1H), 5.24 (d, *J* = 0.7 Hz, 1H), 3.83 (s, 3H), 1.73 (d, *J* = Hz, 1H), 1.10 (s, 9H).

<sup>13</sup>C NMR (100 MHz, CDCl<sub>3</sub>, δ): 160.6, 159.3, 136.0, 128.5, 113.9, 110.0, 72.8, 55.5, 35.7, 30.1.

IR (NaCl, thin film): 3405, 2956, 2876, 1698, 1598, 1511, 1489, 1462, 1314, 1261, 1191, 1161, 1072, 1025, 9625, 861, 833, 727, 690, 666.

HRMS–ESI (m/z): [M+Na]<sup>+</sup> calcd for C<sub>14</sub>H<sub>20</sub>O<sub>2</sub>Na, 243.1356; found, 243.1367.

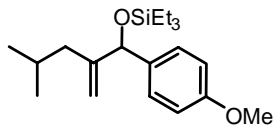

Table 2, entry 11:

The standard procedure was followed. Yield: 99%.

Characterization data of the corresponding alcohol:

$^1\text{H}$  NMR (400 MHz,  $\text{CDCl}_3$ ,  $\delta$ ): 7.28 (d,  $J = 8.7$  Hz, 2H); 6.89 (d,  $J = 8.7$  Hz, 2H); 5.32, (s, 1H); 5.06 (s, 1H); 4.96 (s, 1H); 3.81 (s, 3H); 1.94 (d,  $J = 3.6$  Hz, 1H); 1.83–1.71 (m, 3H); 0.85 (t,  $J = 5.6$  Hz, 9H).

$^{13}\text{C}$  NMR (100 MHz,  $\text{CDCl}_3$ ,  $\delta$ ): 159.4, 150.0, 134.5, 128.4, 114.0, 110.5, 76.7, 55.5, 42.3, 26.5, 23.0, 22.5.

IR (NaCl, thin film): 3402, 2954, 2869, 2837, 1647, 1611, 1587, 1512, 1465, 1384, 1366, 1303, 1249, 1173, 1109, 1036, 906, 851, 829, 780.

HRMS–ESI ( $m/z$ ):  $[\text{M}+\text{Na}]^+$  calcd for  $\text{C}_{20}\text{H}_{34}\text{O}_2\text{SiNa}$ , 357.2220; found, 357.2214.



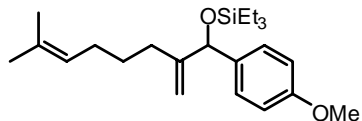

Table 2, entry 12:

The standard procedure was followed. Yield: 94%.

Characterization data of the corresponding alcohol:

$^1\text{H}$  NMR (400 MHz,  $\text{CDCl}_3$ ,  $\delta$ ): 7.29 (d,  $J = 8.7$  Hz, 2H); 6.88 (d,  $J = 8.7$  Hz, 2H); 5.27 (s, 1H); 5.10 (d,  $J = 3.1$  Hz, 1H); 5.06 (t,  $J = 7.1$  Hz, 1H); 4.98 (s, 1), 3.82 (s, 3H); 1.96–1.84 (m, 5H); 1.67 (s, 3H); 1.56 (s, 3H); 1.48–1.42 (m, 2H).

$^{13}\text{C}$  NMR (100 MHz,  $\text{CDCl}_3$ ,  $\delta$ ): 159.3, 151.4, 134.6, 131.9, 128.2, 124.5, 114.0, 109.4, 77.0, 55.5, 31.9, 28.2, 27.9, 25.9, 17.9.

IR (NaCl, thin film): 3404, 2929, 1644, 1611, 1586, 1511, 1442, 1377, 1303, 1248, 1172, 1108, 1036, 902, 830.

HRMS–ESI ( $m/z$ ):  $[\text{M}+\text{Na}]^+$  calcd for  $\text{C}_{23}\text{H}_{38}\text{O}_2\text{SiNa}$ , 397.2533; found, 397.2544.

Table 2, entry 13 compound characterization has been reported in previous phosphine system, see: Ng, S.-S.; Jamison, T. F. *J. Am. Chem. Soc.* **2005**, *127*, 14194-14195.

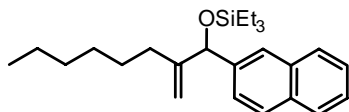

Table 2, entry 14:

The standard procedure was followed. Yield: 73%.

<sup>1</sup>H NMR (400 MHz, CDCl<sub>3</sub>, δ): 7.87–7.78 (m, 4H); 7.50–7.27 (m, 3H); 5.30 (s, 2H); 4.92 (s, 1H); 2.00–1.94 (m, 2H); 1.80–1.76 (m, 2H); 1.40–1.34 (m, 2H); 1.26–1.19 (m, 6H), 0.95 (t, *J* = 7.9 Hz, 9H), 0.84 (t, *J* = 7.0 Hz, 3H), 0.63 (dq, *J* = 7.9, 1.9 Hz, 6H).

<sup>13</sup>C NMR (100 MHz, CDCl<sub>3</sub>, δ): 152.0, 141.2, 133.4, 133.0, 128.2, 127.9, 127.8, 126.0, 125.7, 125.1, 125.1, 109.7, 78.3, 31.9, 30.8, 29.3, 27.8, 22.8, 14.3, 7.1, 5.1.

IR (NaCl, thin film): 2955, 2929, 2875, 1652, 1559, 1507, 1458, 1239, 1122, 1080, 1006, 901, 857, 818, 743.

HRMS–ESI (m/z): [M+Na]<sup>+</sup> calcd for C<sub>25</sub>H<sub>38</sub>OSiNa, 405.2590; found, 405.2583.

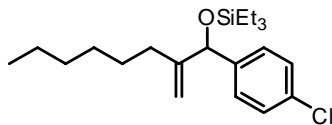

Table 2, entry 15:

The standard procedure was followed, except 40 mol% of Ni(cod)<sub>2</sub>, IPr and 60 mol% of P(OPh)<sub>3</sub> was used, and the product was purified with hexane. Yield: 64%.

<sup>1</sup>H NMR (400 MHz, CDCl<sub>3</sub>, δ): 7.32–7.27 (m, 4H), 5.21 (s, 1H), 5.12 (s, 1H), 4.89 (s, 1H), 1.96–1.90 (m, 1H), 1.76–1.72 (m, 1H), 1.57–1.21 (m, 8H), 0.94 (t, *J* = 8.0 Hz, 9H), 0.88 (t, *J* = 7.1 Hz, 3H), 0.60 (q, *J* = 8.0 Hz, 6H).

<sup>13</sup>C NMR (100 MHz, CDCl<sub>3</sub>, δ): 151.9, 142.4, 132.8, 128.3, 127.9, 109.9, 77.7, 31.9, 30.6, 29.3, 27.9, 22.8, 14.3, 7.0, 5.0.

IR (NaCl, thin film): 2928, 2857, 1653, 1596, 1457, 1076, 1029, 904.

HRMS–ESI (*m/z*): [M+Na]<sup>+</sup> calcd for C<sub>21</sub>H<sub>35</sub>OClSiNa, 389.2038; found, 389.2055.

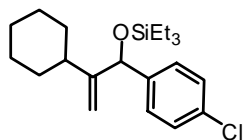

Table 2, entry 16:

The standard procedure was followed, except the product was purified with hexane only.

Yield: 21%.

$^1\text{H}$  NMR (400 MHz,  $\text{CDCl}_3$ ,  $\delta$ ): 7.30–7.26 (m, 4H), 5.22 (t,  $J = 1.3$  Hz, 1H), 5.12 (s, 1H), 4.92 (s, 1H), 1.73–1.56 (m, 6H); 1.16–1.11 (m, 2H); 0.92 (t,  $J = 7.9$  Hz, 9H); 0.59 (dq,  $J = 7.9, 0.4$  Hz, 6H).

$^{13}\text{C}$  NMR (100 MHz,  $\text{CDCl}_3$ ,  $\delta$ ): 157.3, 142.5, 132.8, 128.3, 108.7, 78.2, 39.5, 34.5, 33.6, 27.1, 26.5, 7.0, 5.1.

IR (NaCl, thin film): 2926, 2876, 2852, 1644, 1596, 1489, 1448, 1408, 1239, 1130, 1080, 1015, 975, 890, 853, 808, 726, 666.

HRMS–ESI ( $m/z$ ):  $[\text{M}+\text{Na}]^+$  calcd for  $\text{C}_{21}\text{H}_{33}\text{OClSiNa}$ , 387.1881; found, 387.1899.

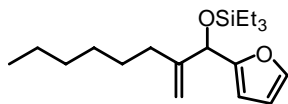

Table 2, entry 17:

The standard procedure was followed, except the reaction was carried out at room temperature, and with 40 mol% of Ni(cod)<sub>2</sub>, IPr and 60 mol% of P(OPh)<sub>3</sub>. Yield: 36%.

Characterization data of the corresponding alcohol:

<sup>1</sup>H NMR (400 MHz, CDCl<sub>3</sub>, δ): 7.41 (m, 1H), 6.36 (m, 1H), 6.28 (m, 1H), 5.27 (s, 1H), 5.20 (d, *J* = 4.9 Hz, 1H), 5.06 (s, 1H), 2.08 (d, *J* = 4.9 Hz, 1H), 2.11–1.91 (m, 2H), 1.52–1.37 (m, 2H), 1.36–1.19 (m, 6H), 0.84 (t, *J* = 7.0 Hz, 3H).

<sup>13</sup>C NMR (100 MHz, CDCl<sub>3</sub>, δ): 155.1, 149.0, 142.5, 110.7, 110.5, 107.4, 71.0, 32.5, 31.9, 29.3, 28.0, 22.8, 14.3.

IR (NaCl, thin film): 3367, 2957, 2929, 2858, 1651, 1503, 1466, 1378, 1223, 1143, 1039, 1010, 907, 798, 735, 598.

HRMS–ESI (m/z): [M+Na]<sup>+</sup> calcd for C<sub>13</sub>H<sub>20</sub>O<sub>2</sub>Na, 231.1356; found, 231.1358.

TES deprot m-CF3 Styrene Addt

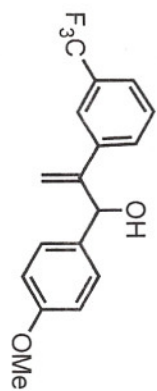

Current Data Parameters  
 NAME NcyB-5546A  
 EXPNO 1  
 PROCNO 1

F2 - Acquisition Parameters  
 Date\_ 20050822  
 Time 19.04  
 INSTRUM spect  
 PULPROG gm BB0 BB-1  
 ID ZG30  
 SOLVENT CUC12  
 NS 16  
 DS 2  
 SWH 8278.146 Hz  
 FIDRES 0.135314 Hz  
 AQ 3.9984243 sec  
 RG 256  
 DW 60.400 usec  
 DE 6.00 usec  
 TE 300.2 K  
 D1 1.00000000 sec

\*\*\*\*\* CHANNEL f1 \*\*\*\*\*  
 NUC1 1H  
 P1 7.90 usec  
 PL1 0.00 dB  
 SF01 400.1324710 MHz

F2 - Processing parameters  
 S1 32768  
 SF 400.1300000 MHz  
 MDM EM  
 SSB 0  
 LB 0.30 Hz  
 GB 0  
 PC 1.00

10 NMR Q10t Parameters  
 CX 24.00 cm  
 F1P 10.500 ppm  
 F1 4201.35 Hz  
 F2P -0.500 ppm  
 F2 -200.07 Hz  
 PPM1CH 0.45833 ppm/cm  
 MZCH 183.39291 Hz/cm

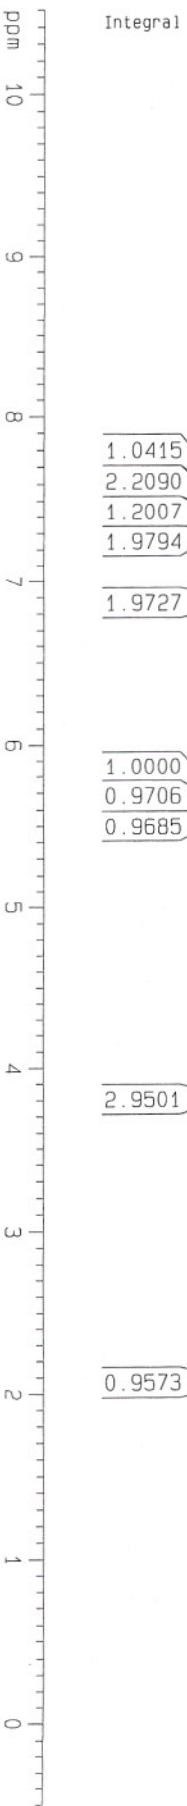

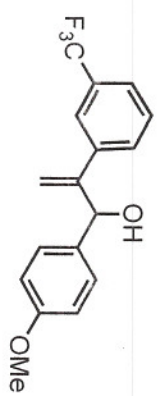

TES deprot m-CF3 styrene Apdt

Current Data Parameters  
 NAME N79-25404  
 EXPNO 2  
 PRQNO 1

F2 - Acquisition Parameters  
 DATE\_ 20080822  
 TIME 19.06  
 INSTRUM spect  
 PULPROG sm BRD BR-I  
 PULPROG 299P30  
 TO 65556  
 SOLVENT CDCl3  
 NS 14924  
 DS 4  
 SWH 24975.621 Hz  
 FIDRES 0.319572 Hz  
 AQ 1.3172656 sec  
 AD 1.0000000  
 DM 20.740 usec  
 DE 6.100 usec  
 TE 300.0 K  
 D1 2.00000000 sec  
 d11 0.03000000 sec  
 d12 0.00002000 sec

\*\*\*\*\* CHANNEL f1 \*\*\*\*\*  
 NUC1 13C  
 P1 15.29 usec  
 PL1 3.00 dB  
 SF01 100.6237569 MHz

\*\*\*\*\* CHANNEL f2 \*\*\*\*\*  
 CPDPRG2 waltz16  
 NUC2 1H  
 P2 107.50 usec  
 PL2 0.00 dB  
 PL12 24.00 dB  
 PL13 24.00 dB  
 SF02 400.1360005 MHz

F2 - Processing parameters  
 SI 32769  
 SF 100.6127491 MHz  
 WDW EM  
 SSB 0  
 LB 1.00 Hz  
 GB 0  
 PC 1.40

ID NMR plot parameters  
 CX 24.00 cm  
 F1P 226.000 ppm  
 F1 22134.80 Hz  
 F2P -10.000 ppm  
 F2 -98613 Hz  
 PRQPCW 9.86133 ppm/cm  
 HZCM 964.25944 Hz/cm

- 159.572
- 149.497
- 140.430
- 133.616
- 130.567
- 130.490
- 128.857
- 128.476
- 124.479
- 124.034
- 115.310
- 114.202
- 77.944
- 77.548
- 77.231
- 76.913
- 75.601
- 55.485

Chemical shift scale in ppm, ranging from 0 to 200.

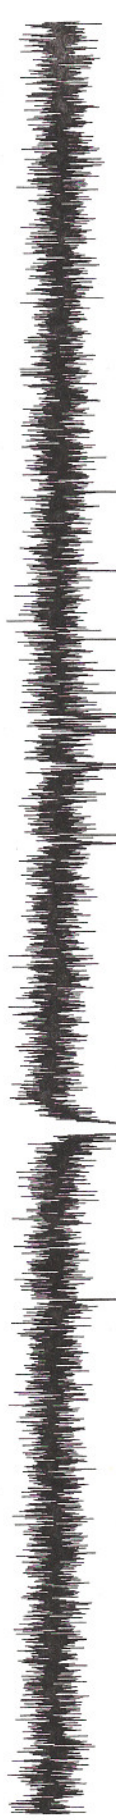

TES deprotection, 1-octene

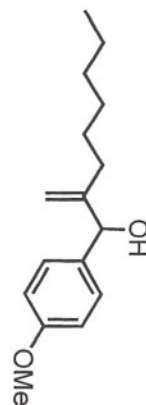

Current Data Parameters  
 NAME hcyl-256-de-oct  
 EXPNO 1  
 PROCNO 1

F2 - Acquisition Parameters  
 Date\_ 20060722  
 Time 11:35  
 INSTRUM spect  
 PROBHD 5 mm QNP 1H/1  
 PULPROG zgpg30  
 TD 65536  
 SFO1 400.132710 MHz  
 SOLVENT CDCl3  
 NS 1  
 DS 1  
 SWH 8278.146 Hz  
 FIDRES 0.126314 Hz  
 AQ 3.9584243 sec  
 RG 256  
 DM 60.400 usec  
 DE 6.00 usec  
 TE 293.7 K  
 D1 1.00000000 sec  
 MCREST 0.00000000 sec  
 MCKR 0.01500000 sec

===== CHANNEL f1 =====  
 NUC1 H  
 P1 9.88 usec  
 PL1 3.00 dB  
 SFO1 400.132710 MHz

F2 - Processing parameters  
 SI 32768  
 SF 400.1300054 MHz  
 MW EM  
 SSF 0  
 LB 0.30 Hz  
 GB 0  
 PC 1.00

1D NMR Plot Parameters  
 CX 24.00 cm  
 CY 12.00 cm  
 F1P 10.500 ppm  
 F1 4201.35 Hz  
 F2P -0.500 ppm  
 F2 -200.07 Hz  
 PPMCH 0.45833 ppm/cm  
 HZCM 183.38291 Hz/cm

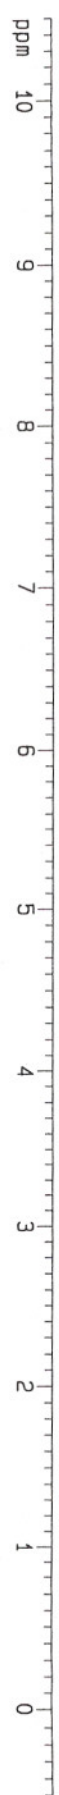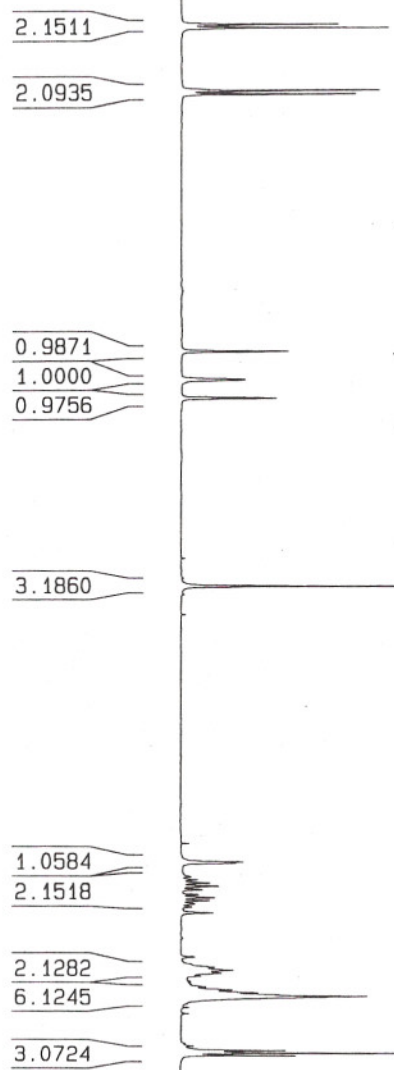

Peak chemical shifts (ppm):  
 2.1511  
 2.0935  
 0.9871  
 1.0000  
 0.9756  
 3.1860  
 1.0584  
 2.1518  
 2.1282  
 6.1245  
 3.0724



Current Data Parameters  
 NAME hc98-226a-dr-act  
 EXNO 2  
 PROCNO 1

F2 - Acquisition Parameters  
 Date\_ 20060722  
 Time 12.30  
 INSTRUM spect  
 PROBD 5 mm QNP 1H/1  
 PULPROG zgpg30  
 TD 65536  
 SOLVENT CDCl3  
 NS 529  
 DS 2  
 SMI 23980.814 Hz  
 FIDRES 0.366318 Hz  
 AQ 1.3664756 sec  
 RG 3251  
 DE 20.860 usec  
 TE 294.4 K  
 D1 2.00000000 sec  
 DELTA 0.03000000 sec  
 MCKEY 1.69999998 sec  
 MCKEY 0.00000000 sec  
 MCKEY 0.00000000 sec

===== CHANNEL f1 =====  
 NUC1 13C  
 P1 6.50 usec  
 PL1 3.00 dB  
 SFO1 100.6282398 MHz

===== CHANNEL f2 =====  
 CPDPRG2 waltz16  
 NUC2 1H  
 P1 88.01 usec  
 PL2 3.00 dB  
 PL12 22.00 dB  
 PL13 22.00 dB  
 SFO2 400.1316005 MHz

F2 - Processing parameters  
 SI 32768  
 SF 100.6127655 MHz  
 MD 0  
 SSB 0  
 LB 1.00 Hz  
 GB 0  
 PC 1.40

10 NMR Dat Parameters  
 CX 24.00 cm  
 CY 4.58 cm  
 F1P 219.353 DPM  
 F1R 22069.87 Hz  
 F2P -18.399 DPM  
 F2R 913115 Hz/cm  
 PSIGN 999.20074 Hz/cm  
 HZCM

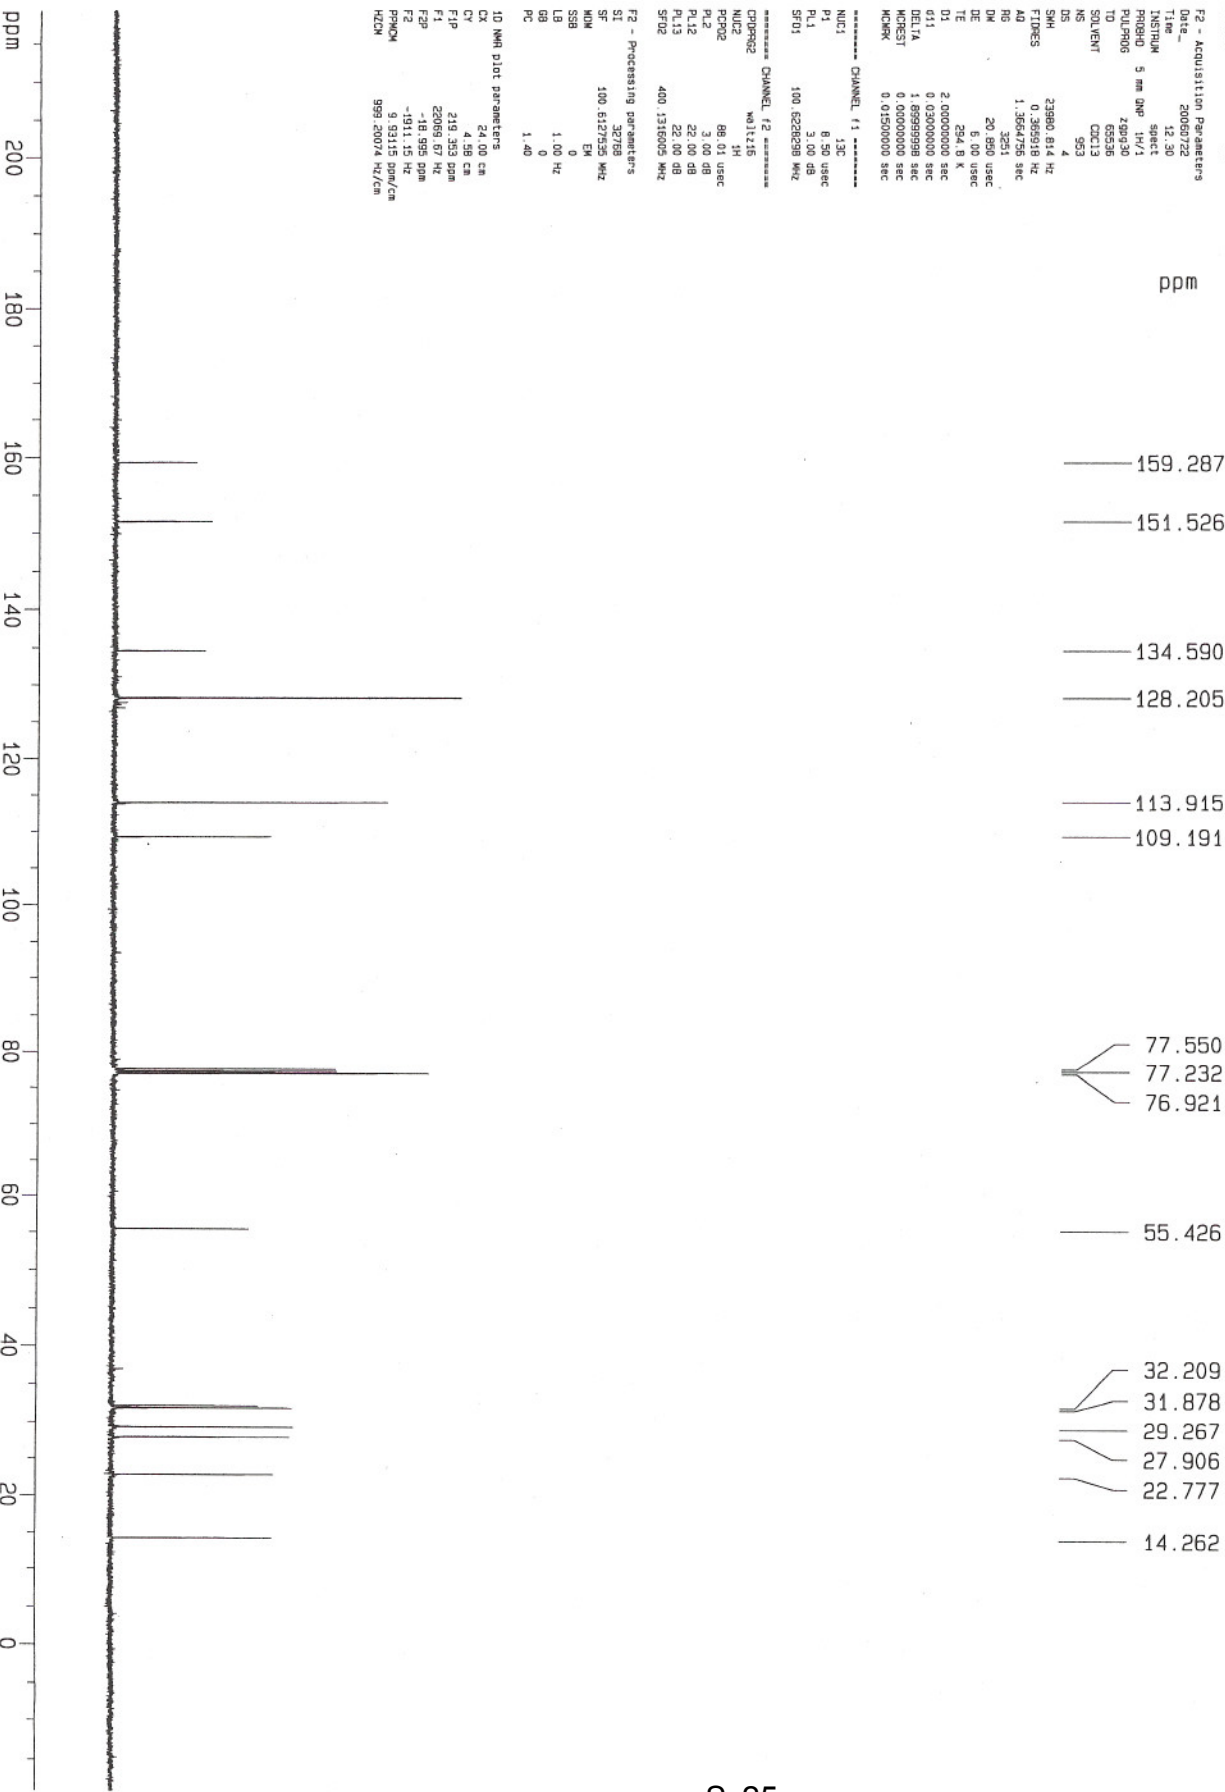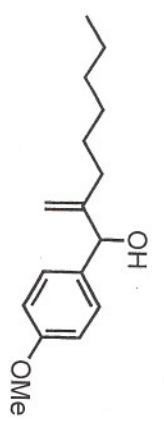

TES deprotected o-OMe Addt

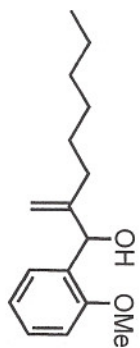

Current Data Parameters  
 NAME hcp6-234cde-4  
 EXNO 1  
 PROCNO 1

F2 - Acquisition Parameters  
 Date\_ 20060731  
 Time 18.04  
 INSTRUM spect  
 PROBHD Sma BBO BB-1  
 PULPROG zg30  
 TD 65536  
 SOLVENT CDCl3  
 NS 2  
 DS 2  
 SMI 8278.148 Hz  
 FIDRES 0.126314 Hz  
 AQ 3.996243 sec  
 RG 161.3  
 DM 60.400 usec  
 DE 6.00 usec  
 TE 300.0 K  
 D1 1.00000000 sec

\*\*\*\*\* CHANNEL f1 \*\*\*\*\*  
 NUC1 1H  
 P1 7.50 usec  
 PL1 0.00 dB  
 SF01 400.1324710 MHz

F2 - Processing parameters  
 SI 32768  
 SF 400.1300000 MHz  
 WHW 0  
 SSB 0  
 LB 0.30 Hz  
 GB 0  
 PC 1.00

1D NMR plot parameters  
 CX 24.00 cm  
 F1P 10.500 ppm  
 F1 4201.36 Hz  
 F2P -0.500 ppm  
 F2 -200.07 Hz  
 PPM/CN 0.45833 ppm/cm  
 HZ/CN 183.35291 Hz/cm

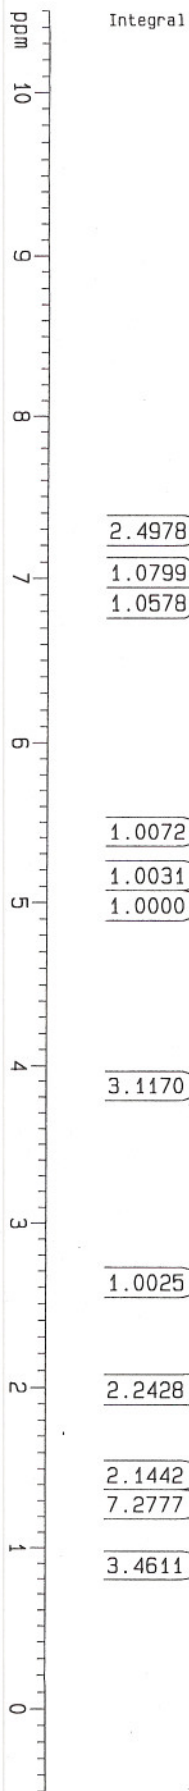

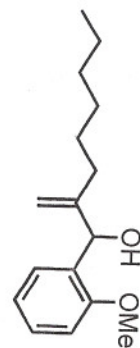

Current Data Parameters  
 NAME hcvh-23acde-A  
 EXPNO 2  
 PROCNO 1

F2 - Acquisition Parameters  
 Date\_ 2008/07/31  
 Time 18:08  
 INSTRUM spect  
 PROBHD 5mm BBO  
 PULPROG zgpg30  
 TD 65536  
 SOLVENT CDCl3  
 NS 718  
 DS 4

===== CHANNEL f1 =====  
 NUC1 13C  
 P1 15.00 usec  
 PL1 0.00 dB  
 SFO1 100.627399 MHz

===== CHANNEL f2 =====  
 CPDPRG2 waltz16  
 NUC2 1H  
 PCPD2 107.50 usec  
 PL2 0.00 dB  
 PL12 24.00 dB  
 PL13 24.00 dB  
 SFO2 400.1315005 MHz

F2 - Processing parameters  
 SI 32768  
 SF 100.6127505 MHz  
 MDM EM  
 SSB 0  
 GB 1.00 Hz  
 BR 0  
 PC 1.40

1D NMR p10t parameters  
 CX 24.00 cm  
 F1P 220.000 ppm  
 F1 22134.80 Hz  
 F2P -10.000 ppm  
 F2 -1005.13 Hz  
 PRCMCH 9.98333 ppm/cm  
 HZCM 964.20544 Hz/cm

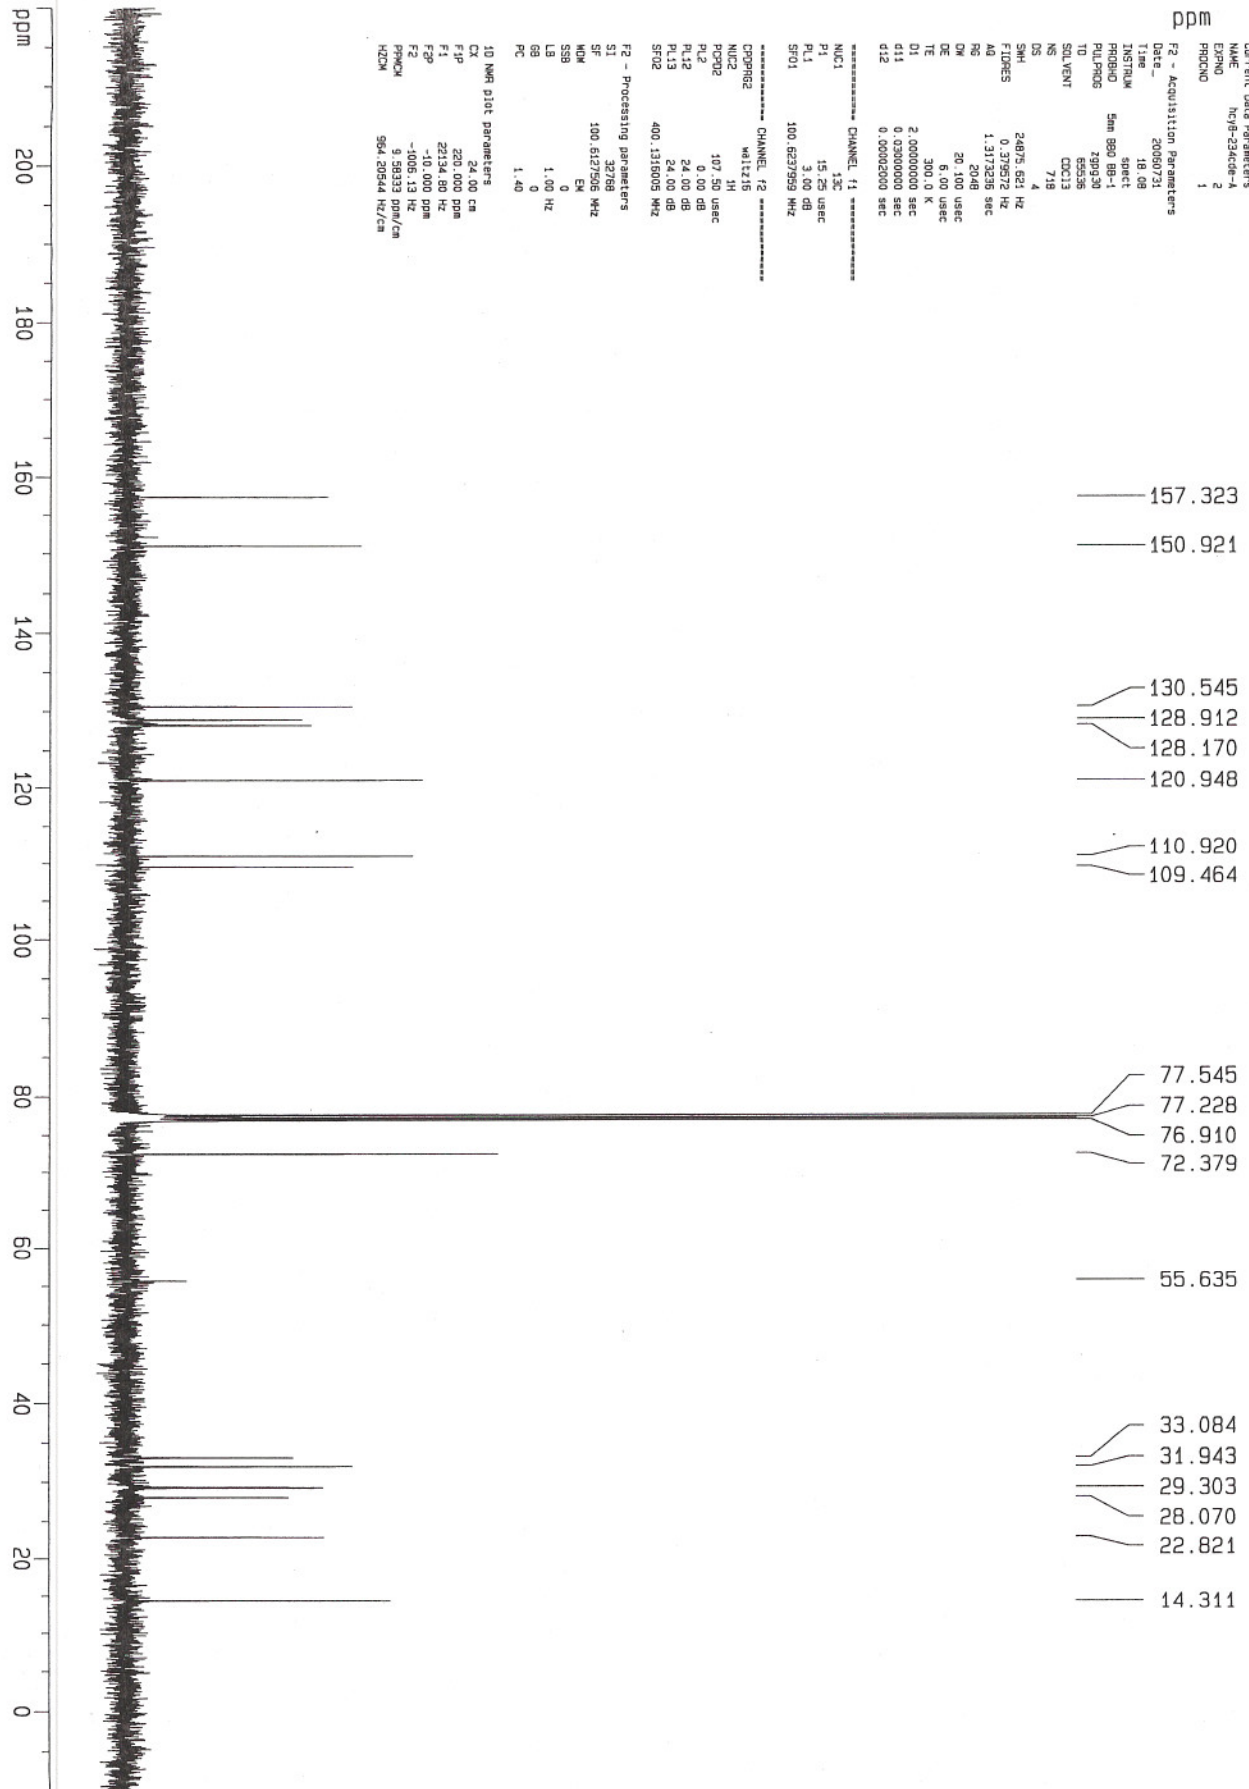

m-OMe Addt

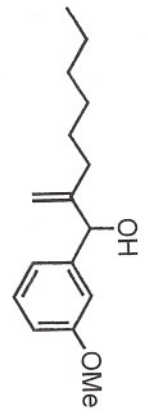

Current Data Parameters  
 NAME hcyf-234de-mOme  
 EXPNO 111  
 PROCNO 1

F2 - Acquisition Parameters  
 Date\_ 20060726  
 Time 20.38  
 INSTRUM spect  
 PROBRD 5 mm QNP 1H/1  
 PULPROG zg30  
 ID 65256  
 SOLVENT CDCl3  
 NS 8  
 DS 1  
 SWH 8378.146 Hz  
 FIDRES 0.12514 Hz  
 AQ 3.956424 sec  
 SFO 562  
 DM 60.400 usec  
 DE 6.00 usec  
 TE 293.7 K  
 D1 1.00000000 sec  
 MCREST 0.00000000 sec  
 MCHNK 0.01500000 sec

\*\*\*\*\* CHANNEL f1 \*\*\*\*\*  
 NUC1 1H  
 P1 9.89 usec  
 PL1 3.00 dB  
 SFO1 400.1324710 MHz

F2 - Processing parameters  
 SI 32769  
 SF 400.1300524 MHz  
 WHW 64  
 EQ 0  
 SSB 0  
 LB 0.30 Hz  
 GB 0  
 PC 1.00

10 NMR slot parameters  
 CX 24.00 cm  
 CY 7.79 cm  
 FIP 10.500 ppm  
 F1 4201.36 Hz  
 F2P -0.500 ppm  
 F2 -200.07 Hz  
 PPMCN 0.45933 ppm/cm  
 MDCN 163.59291 Hz/cm

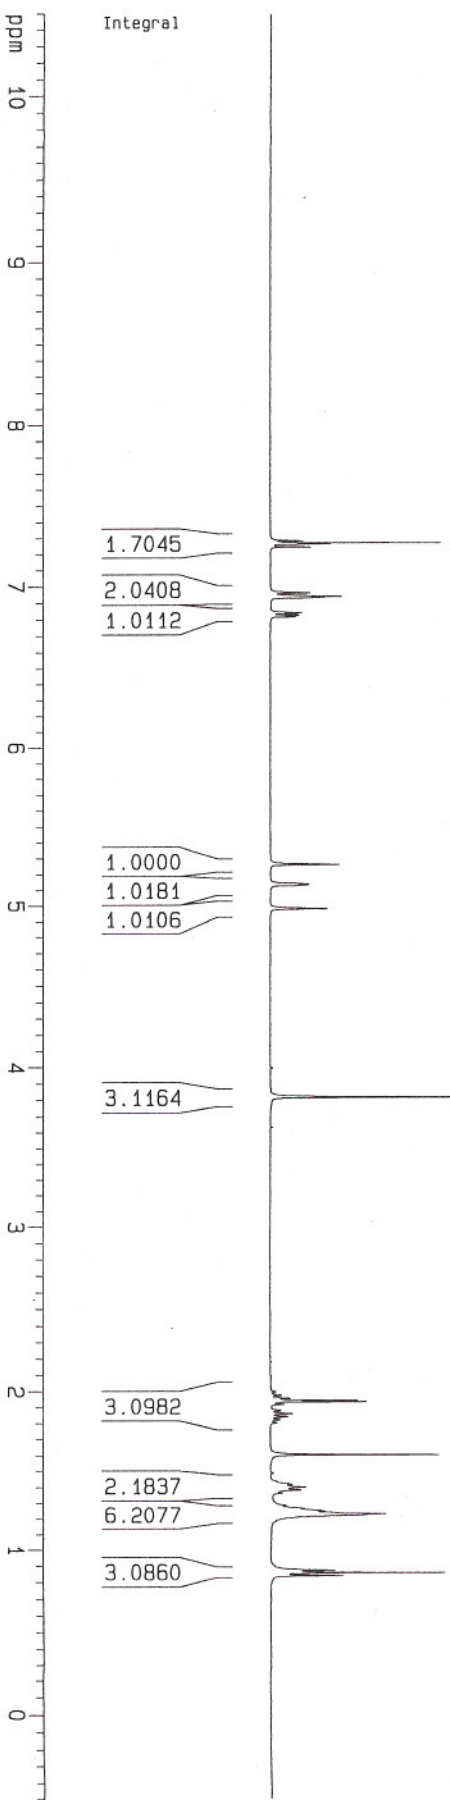

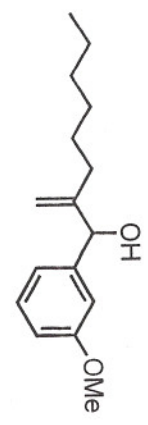

Current Data Parameters  
 NAME nc98234de-8DME  
 EXPNO 222  
 PROCNO 1

F2 - Acquisition Parameters  
 Date\_ 20060726  
 Time 20.40  
 INSTRUM spect  
 PROCNO 5 nm DNP 1H/1  
 PULPROG zgpg30  
 TD 65536  
 SFO1 100.626299 MHz  
 SOLVENT CDCl3  
 NS 847  
 DS 4  
 SWH 3390.844 Hz  
 FIDRES 0.365918 Hz  
 AQ 1.3664766 sec  
 RG 1448.2  
 DW 20.850 usec  
 DE 6.00 usec  
 TE 294.8 K  
 D1 2.00000000 sec  
 d11 0.03000000 sec  
 DELTA 1.89959998 sec  
 MCHRES 0.00000000 sec  
 MCPR 0.01500000 sec

===== CHANNEL f1 =====  
 NUC1 13C  
 P1 8.50 usec  
 PL1 3.00 dB  
 SFO1 100.626299 MHz

===== CHANNEL f2 =====  
 CPDPRG2 waltz16  
 NUC2 1H  
 PCPRG2 88.01 usec  
 PUL2 3.00 dB  
 PL12 22.00 dB  
 PL13 22.00 dB  
 SFO2 400.1316005 MHz

F2 - Processing parameters  
 SI 32768  
 SF 100.6124489 MHz  
 WDW EM  
 SSB 0  
 LB 1.00 Hz  
 GB 0  
 PC 1.40

1D NMR plot parameters  
 CX 24.00 cm  
 CY 7.60 cm  
 F1P 220.000 ppm  
 F1 62134.88 Hz  
 F2P -20.000 ppm  
 F2 -2015.23 Hz  
 FREQM 10.00000 DPM/cm  
 MICH 1000.12744 HZ/cm

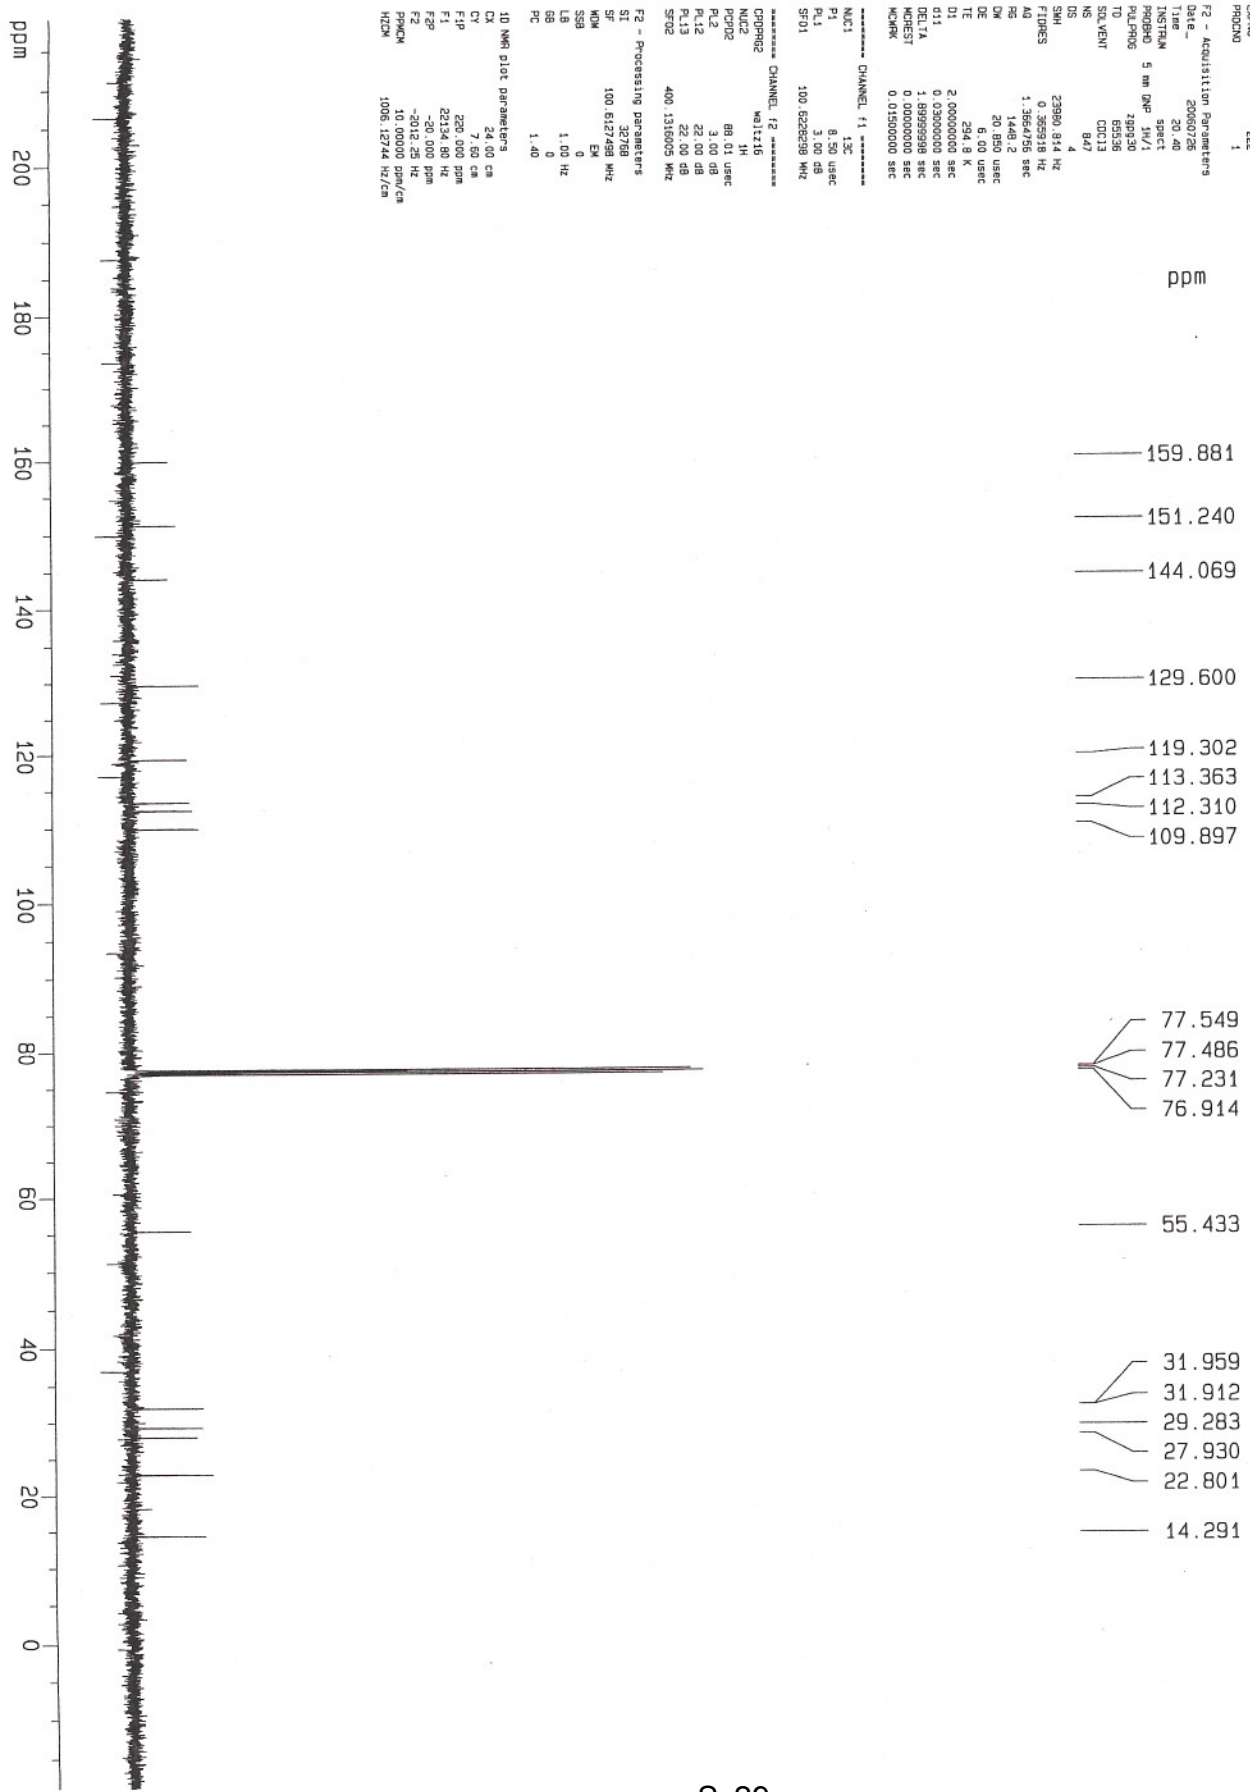

Styrene, p-Anisaldendye, TES deprotection

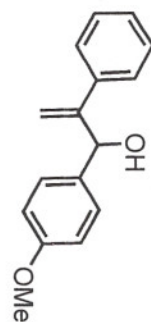

inv. R-122 to Ph CH<sub>2</sub>CH<sub>2</sub>OMe

Current Data Parameters  
 NAME hcv18-17308  
 EXPNO 1  
 PROCNO 1

F2 - Acquisition Parameters  
 Date\_ 20060428  
 Time 12:05  
 INSTRUM spect  
 PROBNM 5mm BBO BB-1  
 PULPROG zg30  
 TO 65536  
 SOLVENT CDCl<sub>3</sub>  
 NS 8  
 DS 2  
 SWH 8278.146 Hz  
 FIDRES 0.166314 Hz  
 AQ 3.1594443 sec  
 RG 60  
 FM 400  
 DE 60.400 usec  
 TE 300.0 K  
 D1 1.00000000 sec  
 \*\*\*\*\* CHANNEL f1 \*\*\*\*\*

NUC1 <sup>1</sup>H  
 P1 7.50 usec  
 PL1 0.00 dB  
 SF01 400.1324710 MHz  
 F2 - Processing Parameters  
 SI 32768  
 SF 400.1300018 MHz  
 KW 64  
 EN 16  
 SSB 0  
 LB 0.30 Hz  
 GB 0  
 PC 1.00  
 ID WAT plot parameters  
 CX 24.00 cm  
 FIP 10.500 ppm  
 F1 4201.36 Hz  
 F2 -0.500 ppm  
 F2 -200.07 Hz  
 FREQHZ 0.45833 ppm/cm  
 HZCM 183.39291 Hz/cm

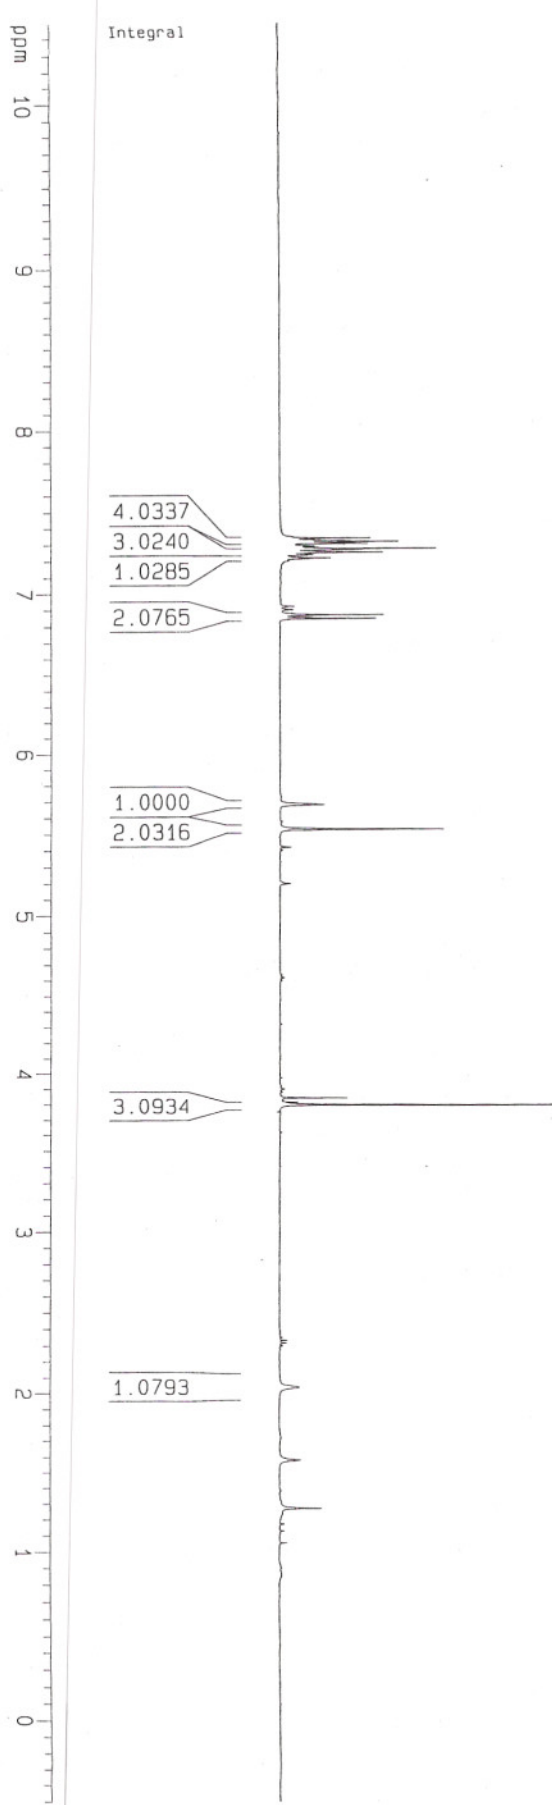

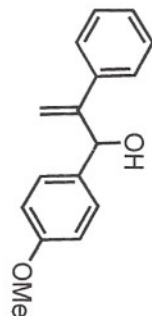

Current Data Parameters  
 NAME hcf-1736  
 EXPNO 2  
 PROCNO 1

F2 - Acquisition Parameters  
 Date\_ 20060428  
 Time 12.09  
 INSTRUM spect  
 PROBRD Sm B60 BB-1  
 PULPROG zgpg30  
 TD 89536  
 SOLVENT CDCl3  
 NS 759  
 DS 2  
 SFO1 24976.624 Hz  
 P1 0.370924 sec  
 A0 1.317326 sec  
 RG 1024  
 DM 20.100 usec  
 DE 6.00 usec  
 TE 300.0 K  
 O1 2.00000000 sec  
 d11 0.03000000 sec  
 d12 0.00002000 sec

\*\*\*\*\* CHANNEL f1 \*\*\*\*\*  
 NUC1 13C  
 P1 15.25 usec  
 PL 3.00 dB  
 SFO1 100.6273959 MHz

\*\*\*\*\* CHANNEL f2 \*\*\*\*\*  
 PPGPRG2 waltz16  
 NUC2 1H  
 PCPD2 107.50 usec  
 PL 0.00 dB  
 PL12 24.00 dB  
 PL13 24.00 dB  
 SFO2 400.1315005 MHz

F2 - Processing parameters  
 SI 32768  
 SF 100.6127596 MHz  
 MDW EM  
 SSB 0  
 LB 1.00 Hz  
 GB 0  
 PC 1.40

1D NMR plot parameters  
 C1 20.000 cm  
 F1p 230.000 ppm  
 F1 22134.80 Hz  
 F2p -10.000 ppm  
 F2 -1006.13 Hz  
 PPMICH 9.58333 ppm/cm  
 HZCM 964.20544 Hz/cm

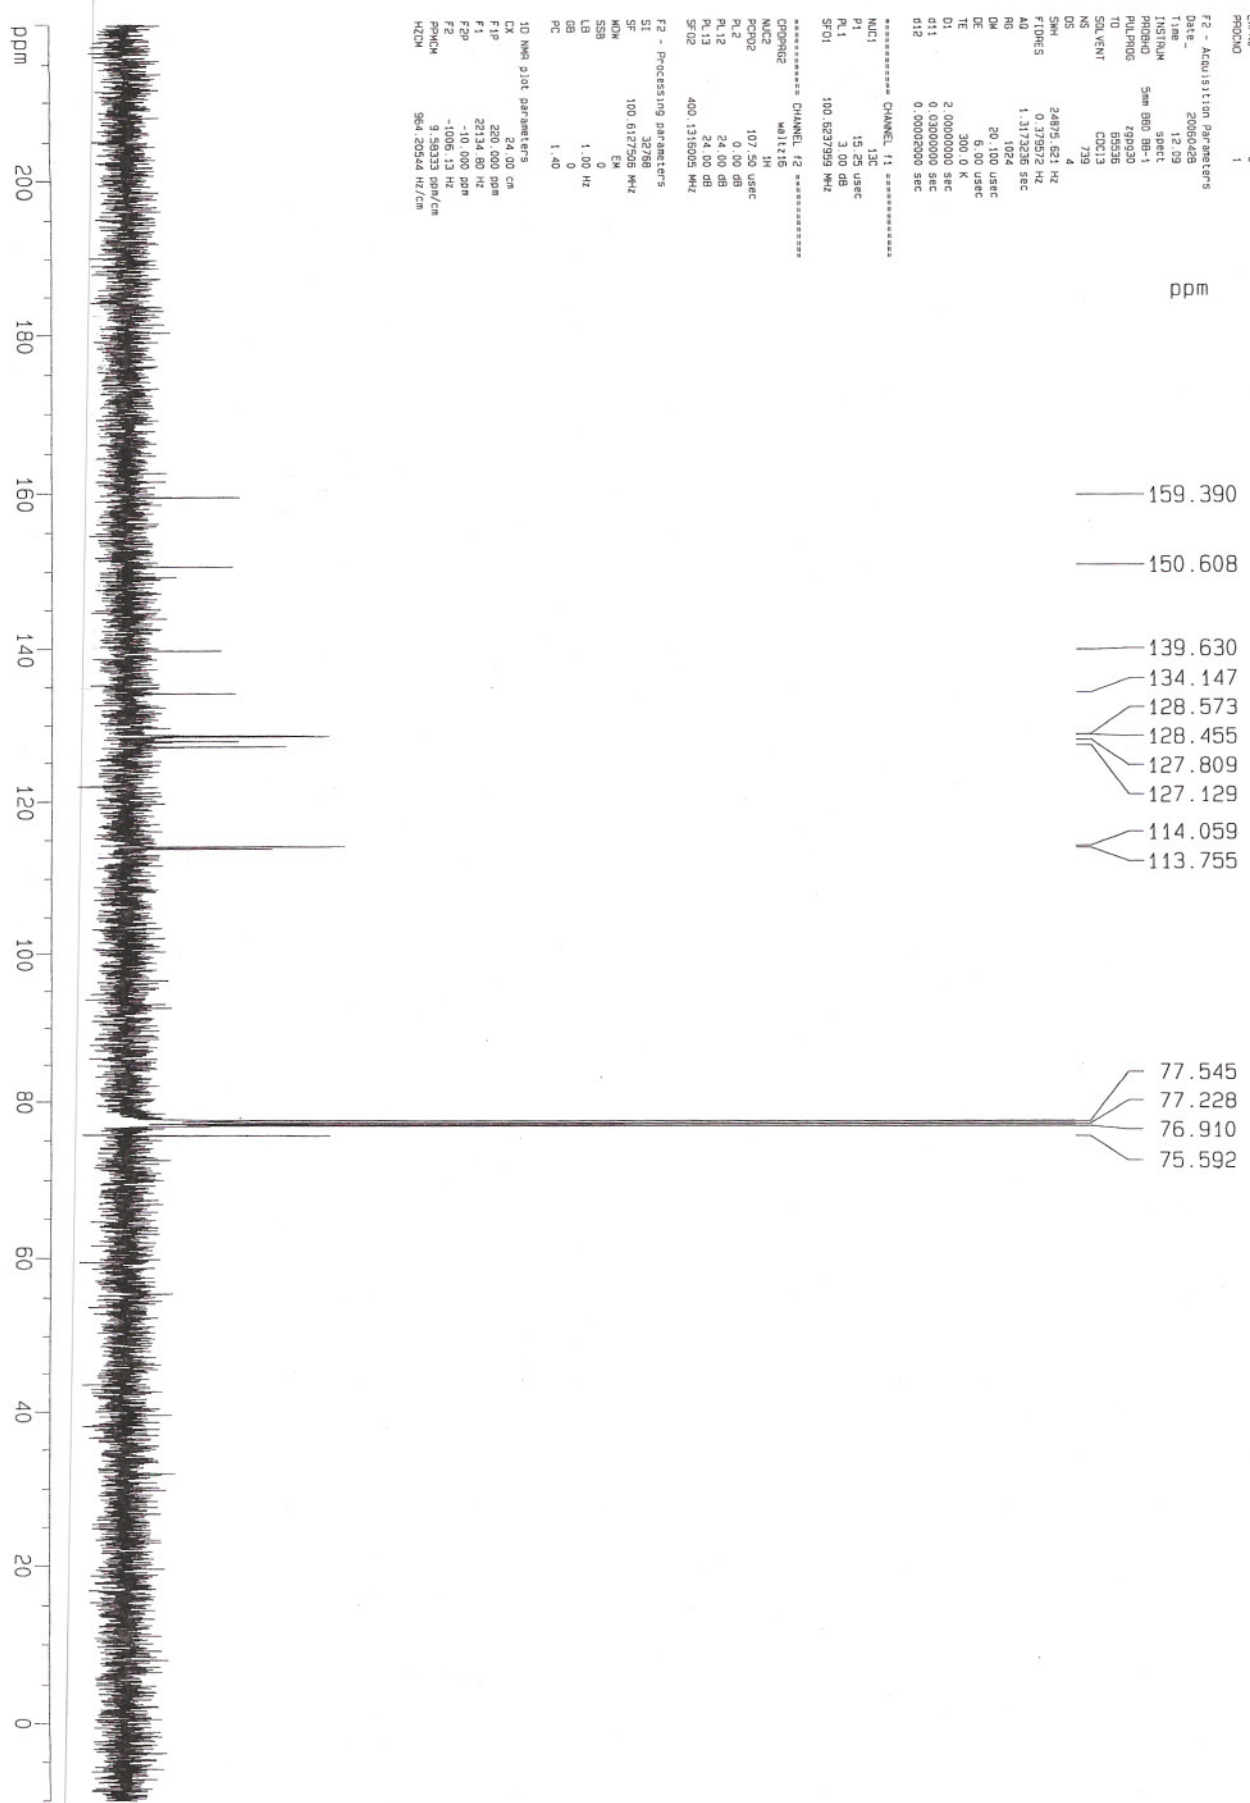

TES deprotected A11Y1Ph Apdt

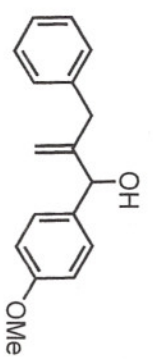

Current Data Parameters  
 Name: 16319-269Hme 4  
 ExpNO: 1  
 PROCNO: 1

F2 - Acquisition Parameters  
 Date\_: 20060727  
 Time: 12.26  
 INSTRUM: spect  
 PROBHD: 5 mm QNP 1H/1  
 PULPROG: zg30  
 TD: 65536  
 SOLVENT: CDCl3  
 NS: 13  
 DS: 1  
 SWH: 8278.146 Hz  
 FIDRES: 0.186314 Hz  
 AQ: 3.3596241 sec  
 RG: 655.36  
 DM: 64.00 usec  
 DE: 6.00 usec  
 TE: 294.2 K  
 O1: 1.00000000 sec  
 MCHRG1: 0.00000000 sec  
 MCHRG2: 0.01500000 sec

\*\*\*\*\* CHANNEL f1 \*\*\*\*\*  
 NUC1: 1H  
 P1: 9.88 usec  
 PL1: 3.00 dB  
 SF01: 400.1324710 MHz

F2 - Processing parameters  
 SI: 32768  
 SF: 400.1300524 MHz  
 WHW: 0  
 SSB: 0  
 LB: 0.30 Hz  
 GB: 0  
 PC: 1.00

1D NMR list parameters  
 CX: 24.00 cm  
 CY: 7.79 cm  
 F1P: 10.500 ppm  
 F1: 4201.35 Hz  
 F2P: -0.500 ppm  
 F2: -200.07 Hz  
 PPM0A: 0.45833 ppm/cm  
 PPM0B: 163.39231 Hz/cm

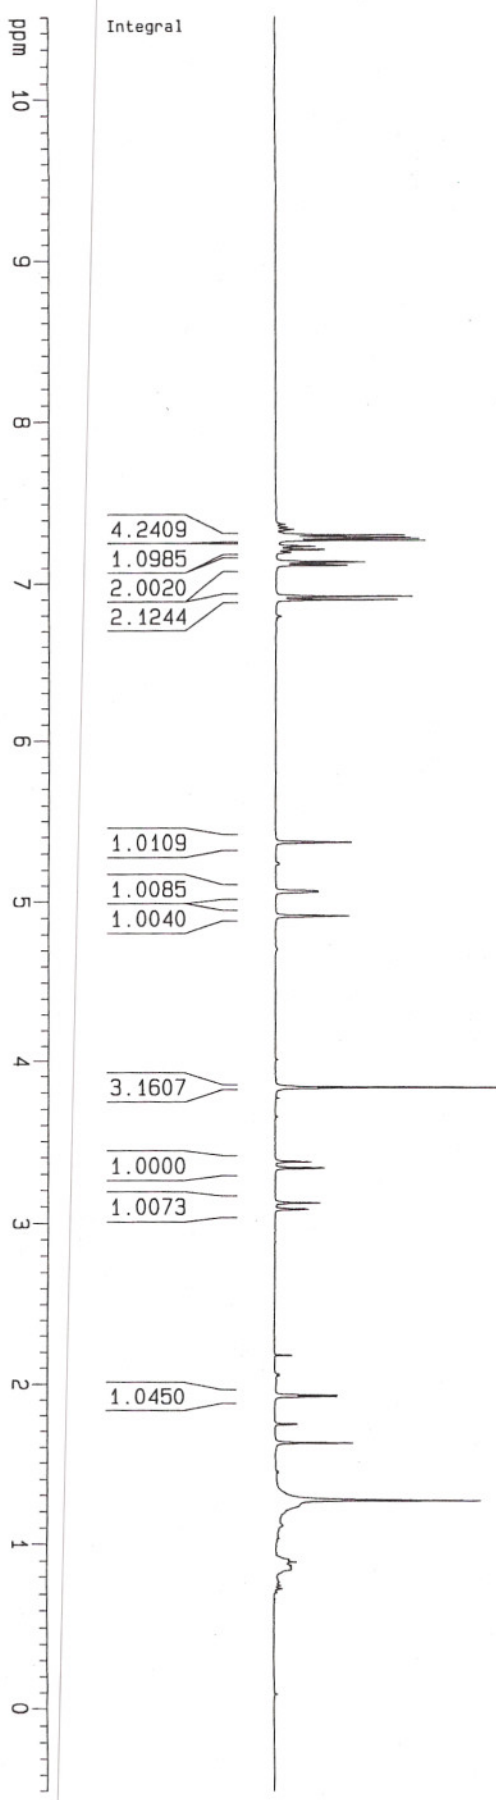



Current Data Parameters  
 Name: ncp-2207ms-2  
 EXPNO: 1  
 PROCNO: 1

F2 - Acquisition Parameters  
 Date\_ : 20060727  
 Time : 12.29  
 INSTRUM : spect  
 PRCBND : 5 mm QNP 1H/1  
 PULPROG : zgpg30  
 TO : 65936  
 SOLVENT : CDCl3  
 NS : 317  
 DS : 4  
 SWH : 2399.814 Hz  
 FIDRES : 0.08241 Hz  
 AQ : 1.366726 sec  
 RG : 3251  
 DW : 20.650 usec  
 DE : 6.00 usec  
 TE : 294.8 K  
 D1 : 2.0000000 sec  
 d11 : 0.0300000 sec  
 DELTA : 1.8999998 sec  
 MCKEY : 0.0000000 sec  
 MCKK : 0.0150000 sec

\*\*\*\*\* CHANNEL f1 \*\*\*\*\*  
 NUC1 : 13C  
 P1 : 8.50 usec  
 PL1 : 0.00 dB  
 SF01 : 100.626268 MHz

\*\*\*\*\* CHANNEL f2 \*\*\*\*\*  
 CPDPRG2 : waltz16  
 NUC2 : 1H  
 P2 : 98.01 usec  
 PL2 : 3.00 dB  
 PL12 : 22.00 dB  
 PL13 : 22.00 dB  
 SF02 : 400.1316005 MHz

F2 - Processing Parameters  
 SI : 32768  
 SF : 100.6127261 MHz  
 WDW : 0  
 SSB : 0  
 LB : 1.00 Hz  
 GB : 0  
 PC : 1.40

1D NMR plot parameters  
 CX : 24.00 cm  
 CY : 6.21 cm  
 F1P : 180.044 ppm  
 F1 : 18114.71 Hz  
 F2P : 37.545 ppm  
 F2 : 37871.69 Hz  
 PPM0H : 2.33323 dip/cen  
 N2DM : 598.58307 Hz/cen

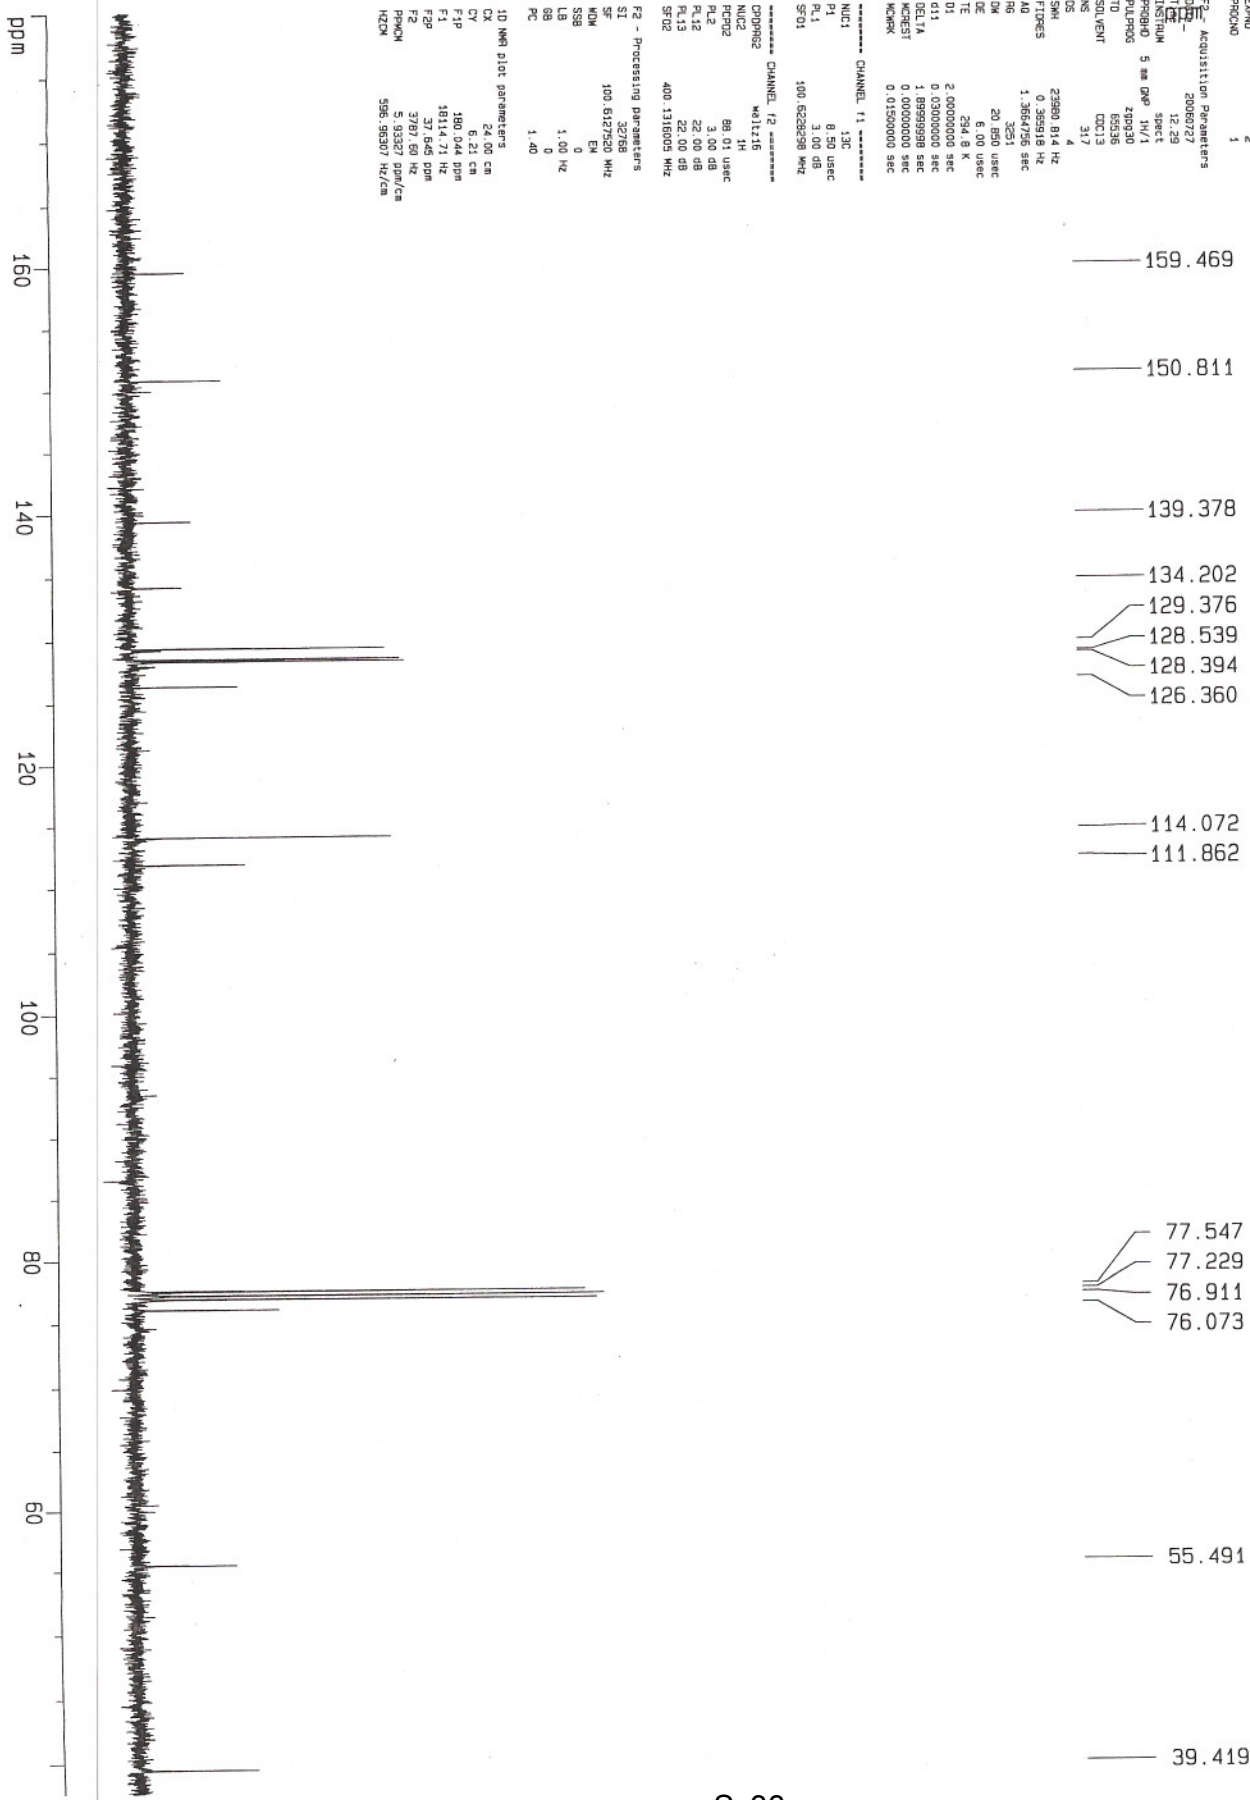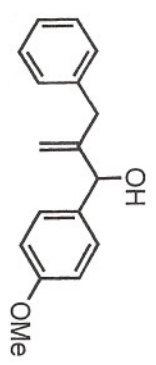

TES depot Apdt: HomallylPh

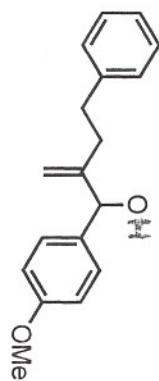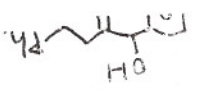

Y. D. Miller, P.

Current Data Parameters  
 NAME hcy6-16detr2  
 EXPNO 1  
 PROCNO 1

F2 - Acquisition Parameters  
 Date\_ 2006/02/1  
 Time 15:41  
 INSTRUM spect  
 PULPROG zgpg30  
 PCVPRG 5 mm QNP 1H/1  
 TV 1030  
 SOLVENT DMSO-d6  
 NS 11  
 DS 1  
 SFO 8276.146 Hz  
 FIDRES 0.126314 Hz  
 AQ 3.9594243 sec  
 RG 3282.5  
 CW 60.400 usec  
 DE 6.00 usec  
 TE 299.1 K  
 O1 1.00000000 sec  
 MDEL 0.00000000 sec  
 MCKEY 0.01500000 sec

\*\*\*\*\* CHANNEL f1 \*\*\*\*\*  
 NUCL1 1H  
 P1 9.00 usec  
 PL1 3.00 dB  
 SFO1 400.1324710 MHz

F2 - Processing parameters  
 SI 32768  
 SF 400.1300054 MHz  
 KW 0  
 EM 0  
 SSB 0  
 LB 0.30 Hz  
 GB 0  
 PC 1.00

1D NMR plot parameters  
 CX 24.00 cm  
 CY 5.95 cm  
 F1 10.500 ppm  
 F2 400.1300054 MHz  
 F2P -300.07 Hz  
 PR 0.45833 ppm/cm  
 HDN 183.39291 Hz/cm

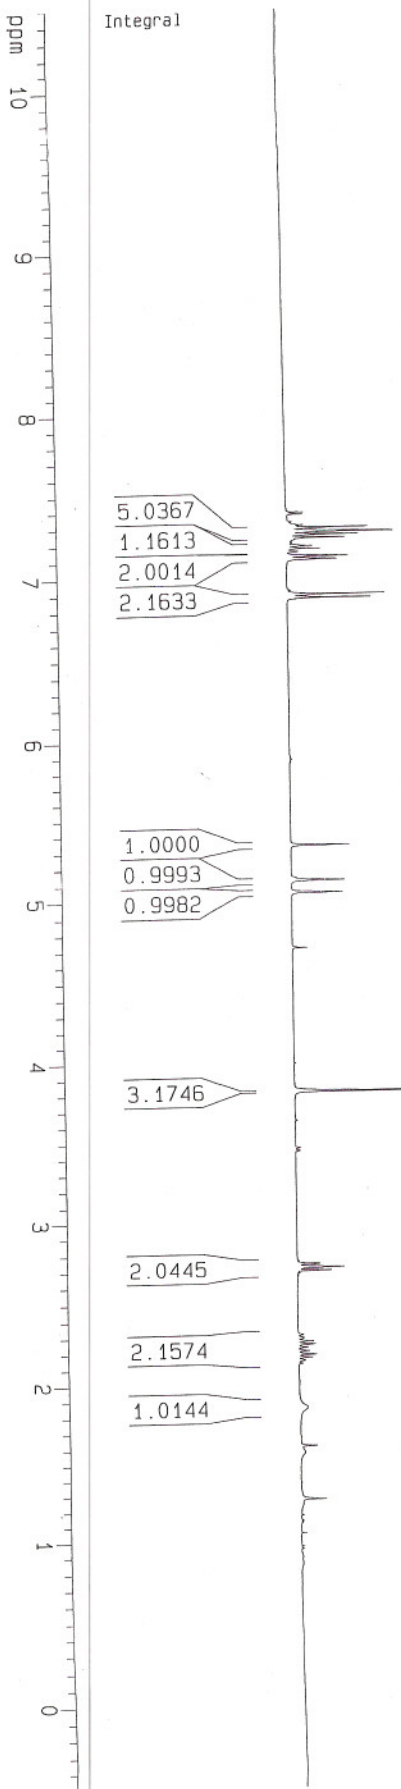

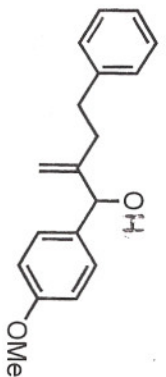

Current Data Parameters  
 NAME hcq8-16dat121  
 EXPNO 2  
 PROCNO 1

F2 - Acquisition Parameters  
 Date\_ 20060425  
 Time 11:01  
 INSTRUM spect  
 PROBR0 5mm BBO BB-1  
 PULPROG zgpg30  
 TO 65536  
 SOLVENT CDCl3  
 NS 2122  
 DS 4  
 SWH 24875.621 Hz  
 FIDRES 0.375972 Hz  
 AQ 1.317229 sec  
 RG 3149  
 DM 201400 usec  
 DE 6.00 usec  
 TE 300.0 K  
 O1 2.00000000 sec  
 O11 0.03000000 sec  
 O12 0.00000000 sec

\*\*\*\*\* CHANNEL f1 \*\*\*\*\*  
 NUC1 13C  
 P1 15.25 usec  
 PL1 3.00 dB  
 SF01 100.627959 MHz

\*\*\*\*\* CHANNEL f2 \*\*\*\*\*  
 CPOPRG2 waltz16  
 NUC2 1H  
 PCPRG2 107.50 usec  
 PL2 0.00 dB  
 PL12 24.00 dB  
 PL13 24.00 dB  
 SF02 400.131802 MHz

F2 - Processing parameters  
 SI 32768  
 SF 100.617514 MHz  
 MDW EM  
 SSB 0  
 LB 1.00 Hz  
 GB 0  
 PC 1.40

10 NMR plot parameters  
 CX 24.00 cm  
 F1P 220.000 ppm  
 F1 22134.80 Hz  
 F2P -10.000 ppm  
 F2 -1006.13 Hz  
 PPHC1H 9.58533 ppm/cm  
 HZCM 964.20551 Hz/cm

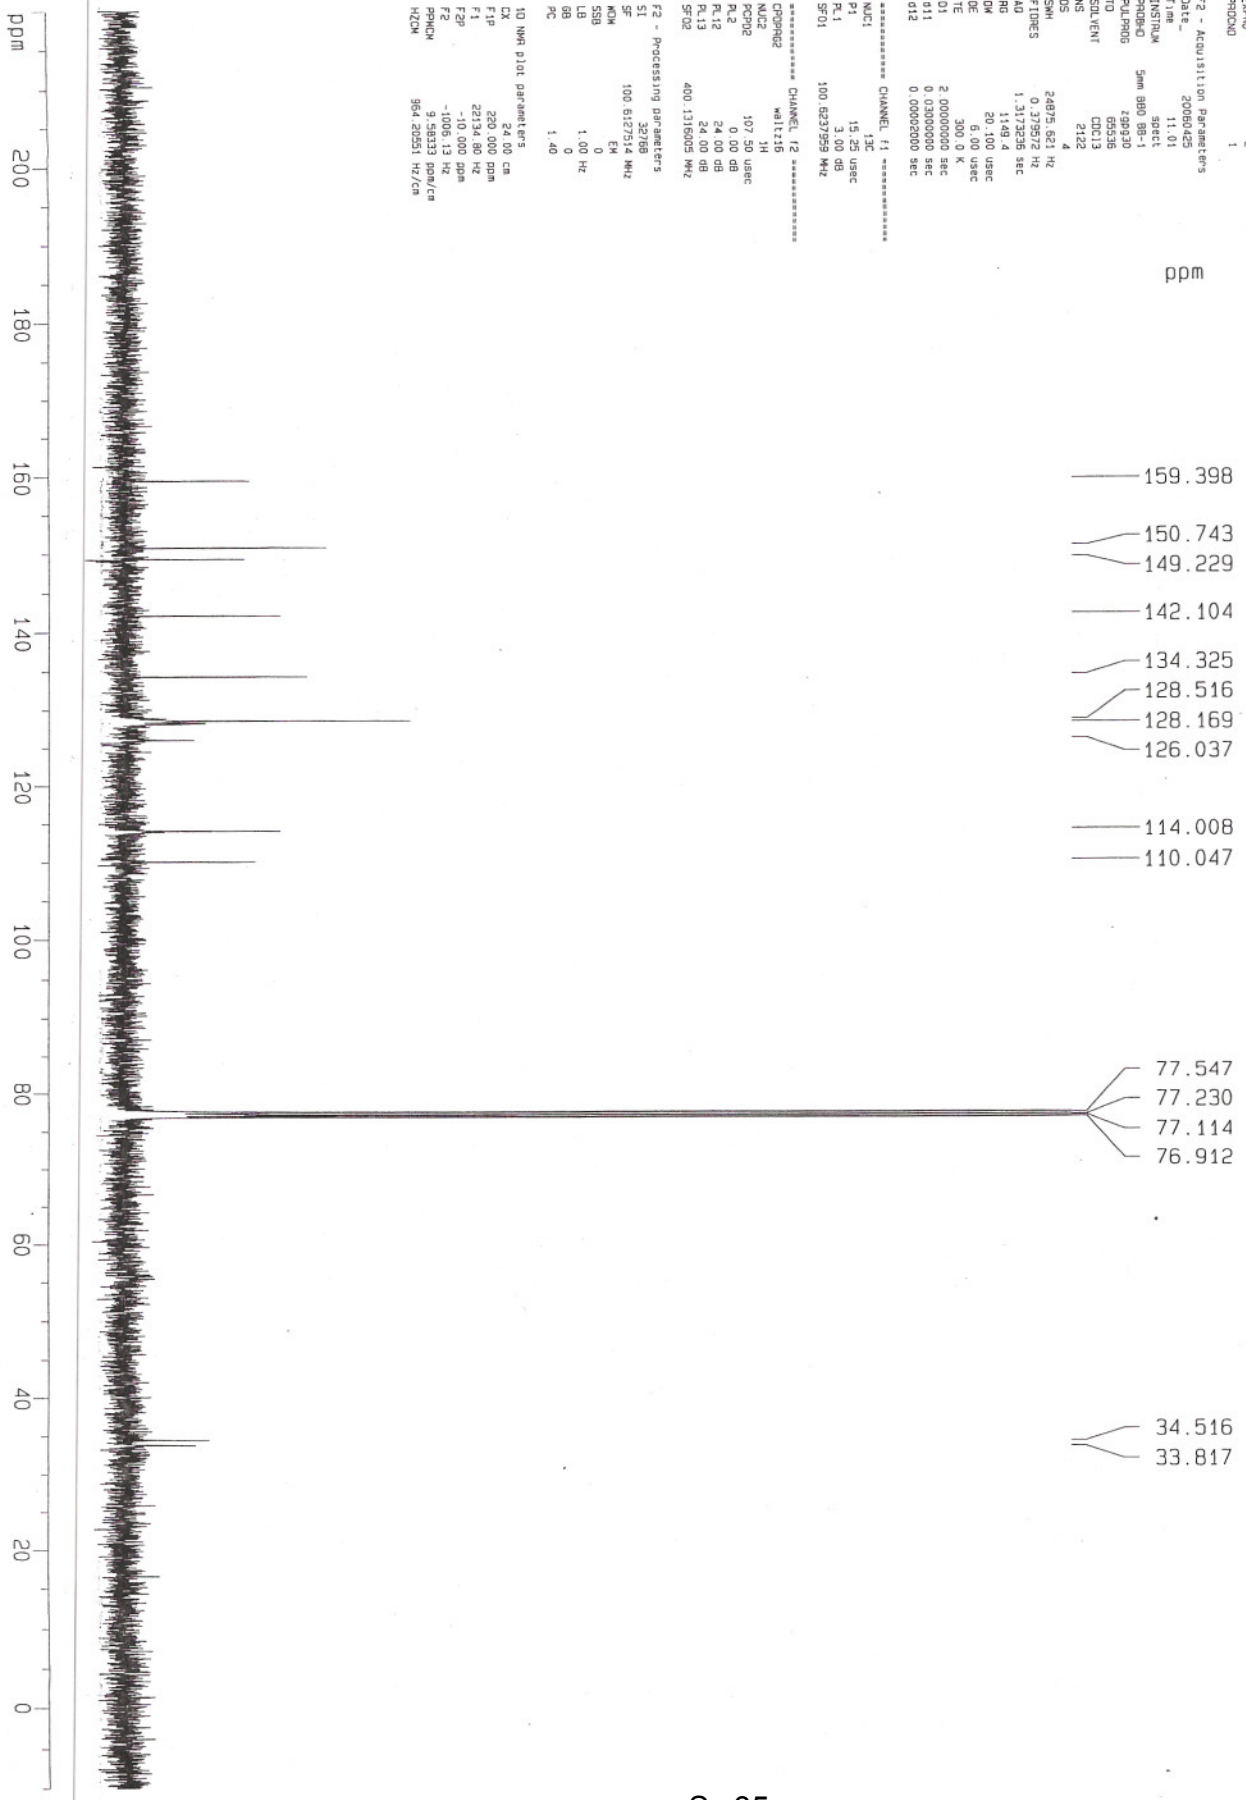

Vinylcy, Apdt

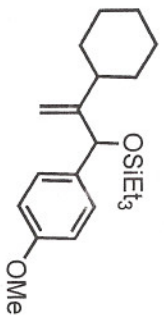

Current Data Parameters  
 NAME ncyb-1520f2  
 EXPNO 1  
 PROCNO 1

F2 - Acquisition Parameters  
 Date\_ 20060419  
 Time 16.06  
 INSTRUM spect  
 PROBRD 5 mm QNP1H/1  
 PULPROG zgpg30  
 TD 65536  
 SOLVENT DMS-D6  
 NS 10  
 DS 0  
 SMH 9615.385 Hz  
 FIDRES 0.146719 Hz  
 AQ 3.4079740 sec  
 RG 8  
 DM 52.000 usec  
 DE 5.00 usec  
 TE 303.0 K  
 D1 1.00000000 sec  
 MCPRST 0.00000000 sec  
 MCPRK 0.01500000 sec

\*\*\*\*\* CHANNEL f1 \*\*\*\*\*  
 NUC1 1H  
 P1 10.00 usec  
 PL1 0.80 dB  
 SFO1 500.132834 MHz

F2 - Processing parameters  
 SI 32768  
 SF 600.1300170 MHz  
 WDW EM  
 SSB 0  
 LB 0.30 Hz  
 GB 0  
 PC 1.00

10 NMR 01st parameters  
 CX 25.00 cm  
 CY 8.49 cm  
 F1P 10.500 ppm  
 F1 6301.37 Hz  
 F2P -0.500 ppm  
 F2 -300.07 Hz  
 PPM0M 0.44000 ppm/cm  
 WZCM 264.05719 Hz/cm

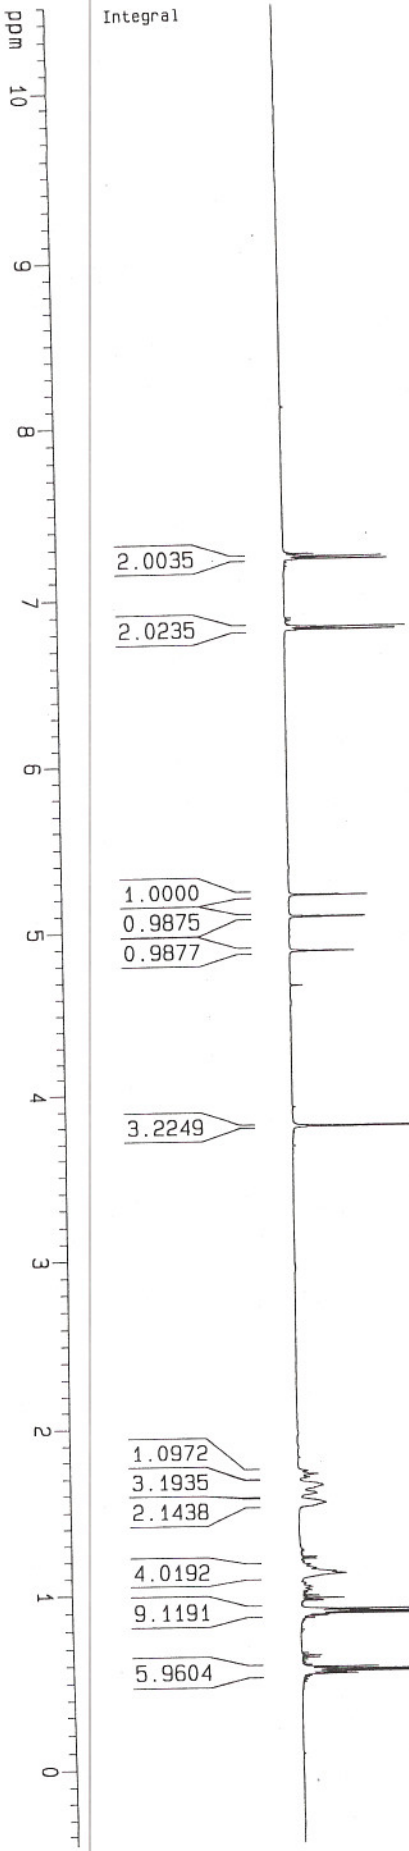

Vinylcyclohexene, Apdt

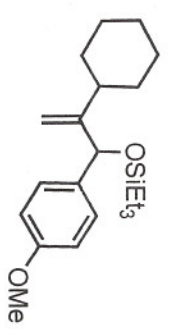

Current Data Parameters  
 NAME hcid-182d  
 EXPNO 2  
 PROCNO 1

F2 - Acquisition Parameters  
 Date\_ 20060201  
 Time 11:12  
 INSTRUM spect  
 PULPROG zgpg30  
 TO 65536  
 SOLVENT CDCl3  
 NS 589  
 DS 4  
 SWH 23980.814 Hz  
 FIDRES 0.3659118 Hz  
 AQ 1.3654756 sec  
 RG 1448.2  
 DM 20.850 usec  
 DE 6.00 usec  
 TE 300.2 K  
 D1 2.0000000 sec  
 d11 0.2000000 sec  
 DELTA 1.8989998 sec  
 WDELTA 0.0000000 sec  
 MCHRG 0.0150000 sec

\*\*\*\*\* CHANNEL f1 \*\*\*\*\*  
 NUC1 13C  
 P1 8.50 usec  
 PL1 3.00 dB  
 SF01 100.6228298 MHz

\*\*\*\*\* CHANNEL f2 \*\*\*\*\*  
 GRPFO2 waitf2  
 NUC2 13C  
 P2 8.50 usec  
 PL2 3.00 dB  
 PL12 22.00 dB  
 PL13 22.00 dB  
 SF02 400.1316095 MHz

F2 - Processing parameters  
 SI 32768  
 SF 100.6127483 MHz  
 WDM EM  
 SSB 0  
 LB 1.00 Hz  
 GB 0  
 PC 1.40

1D NMR plot parameters  
 CV 24.00 cm  
 CY 3.82 cm  
 FIP 219.353 ppm  
 F1 22069.67 Hz  
 F2P -18.995 ppm  
 F2 -1911.15 Hz  
 PPMCKM 9.93115 ppm/cm  
 KZCM 999.20062 Hz/cm

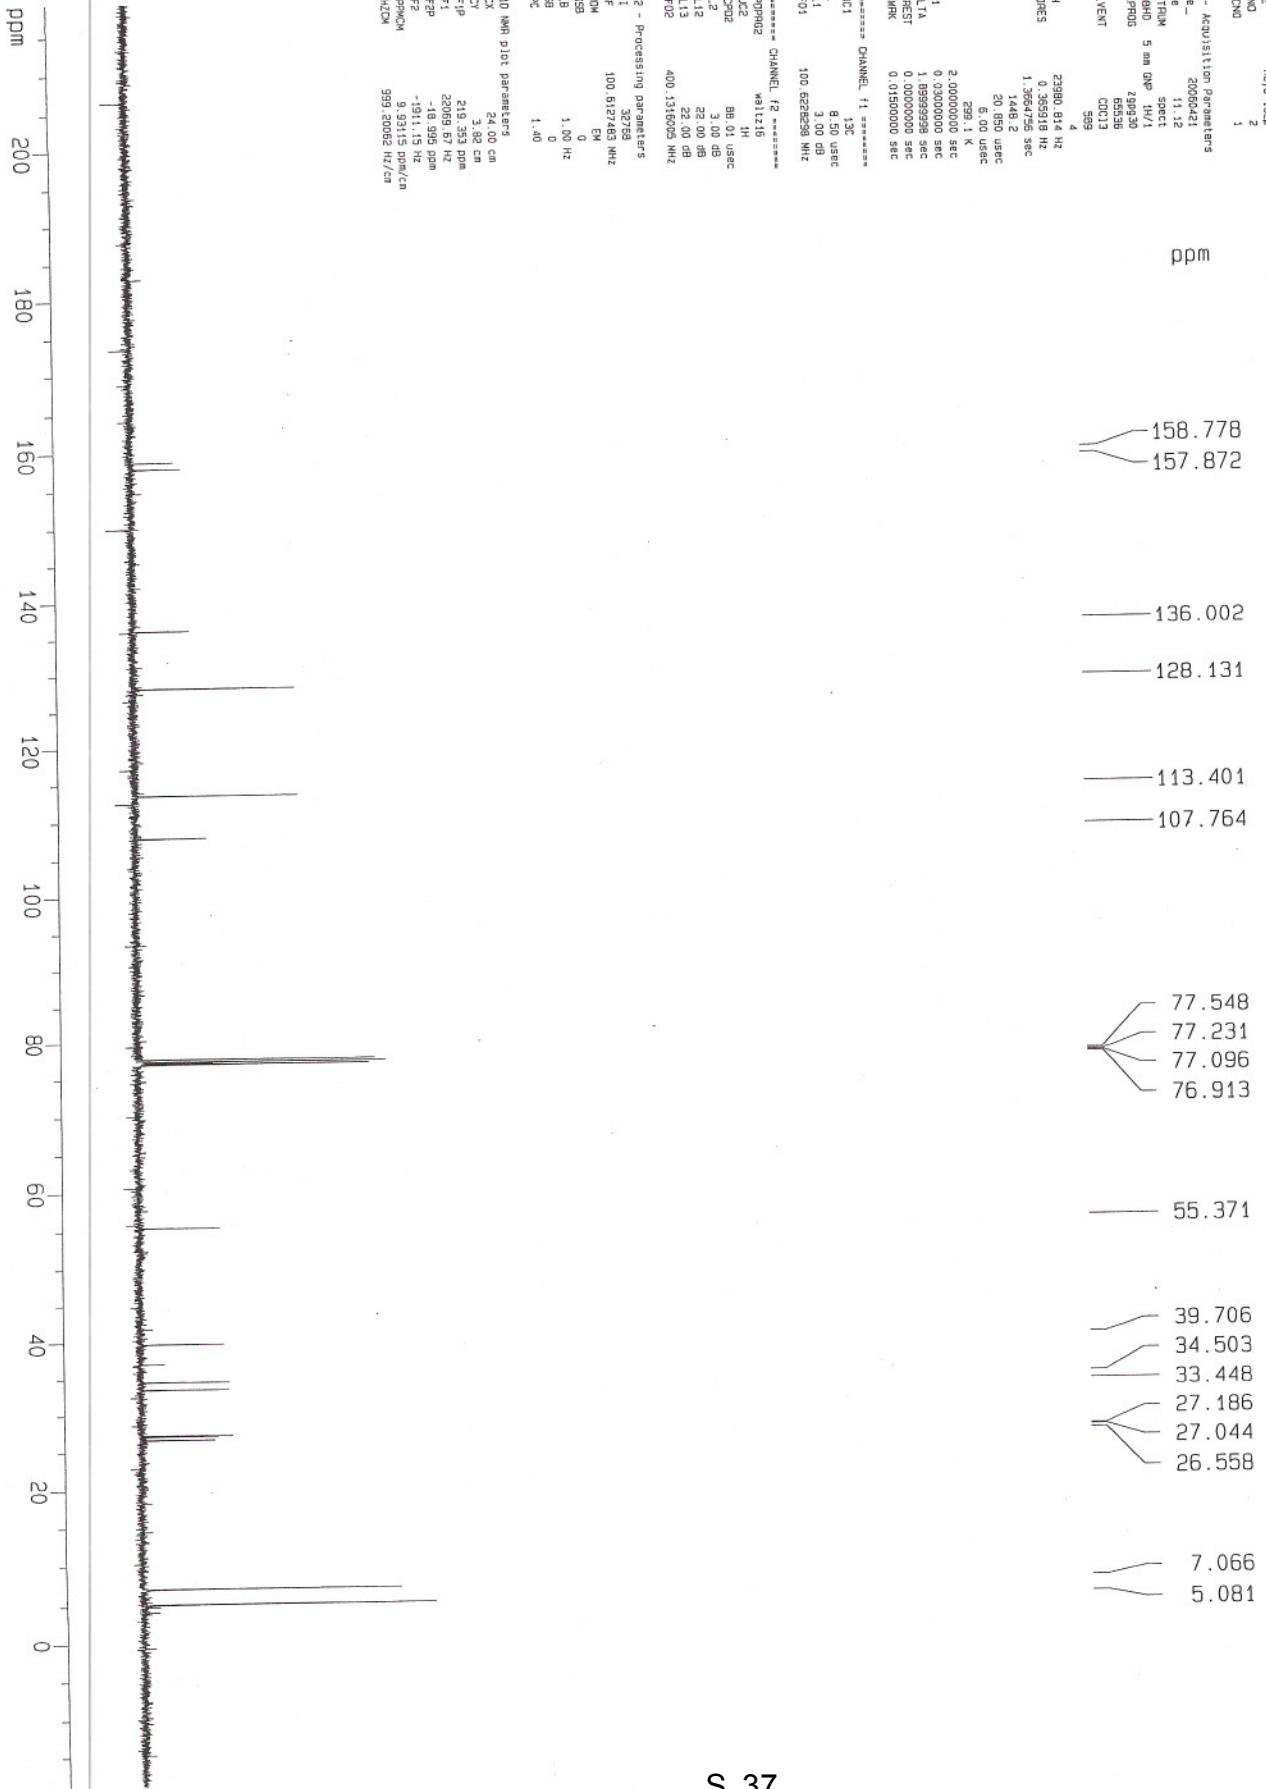

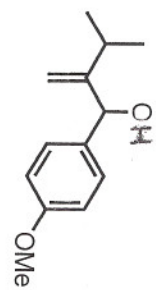

Apdt

Current Data Parameters  
 NAME Hcy9-244de-A  
 EXPNO 1  
 PROCNO 1

F2 - Acquisition Parameters  
 Date\_ 20060808  
 Time 11:57  
 INSTRUM spect  
 PROBHD 5mm BBO BB-1  
 PULPROG zg30  
 TO 69598  
 SOLVENT CDCl3  
 NS 5  
 DS 2  
 SWH 8278.146 Hz  
 FIDRES 0.126314 Hz  
 AQ 3.5964243 sec  
 RG 287.4  
 DE 80.400 usec  
 QE 8.00 usec  
 IE 300.0 K  
 OT 1.00000000 sec

\*\*\*\*\* CHANNEL f1 \*\*\*\*\*  
 NUC1 1H  
 P1 7.50 usec  
 PL 0.00 dB  
 SFO1 400.1324710 MHz

F2 - Processing parameters  
 SI 32768  
 SF 400.1300000 MHz  
 KW EN  
 SSB 0  
 LB 0.30 Hz  
 GB 0  
 PC 1.00

1D NMR list parameters  
 CH 24.00 cm  
 F1 14.500 ppm  
 F2 4201.39 Hz  
 F3 -90.07 Hz  
 PPMCH 0.48693 ppm/cm  
 HZCH 183.38281 Hz/cm

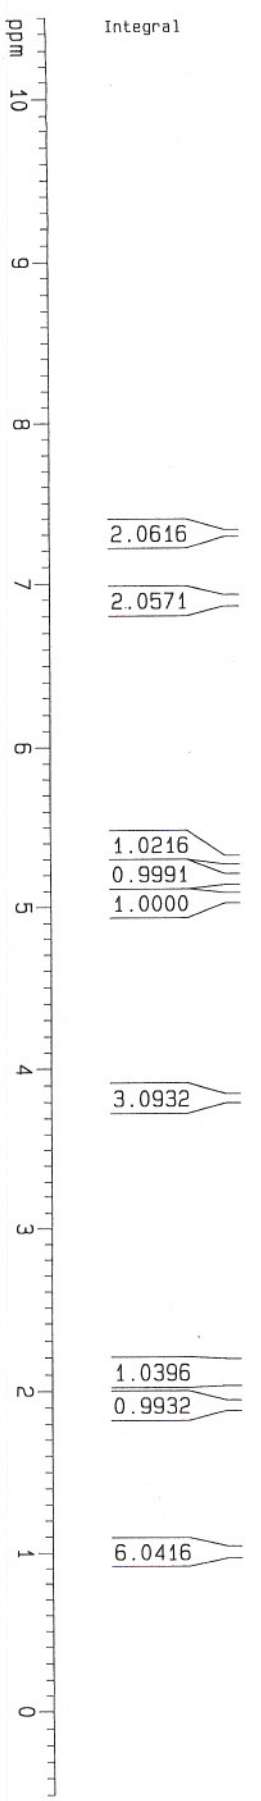

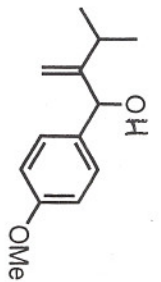

Current Data Parameters  
 NAME hcy8-2440e-A  
 EXPNO 2  
 PROCNO 1

F2 - Acquisition Parameters  
 Date\_ 20090809  
 Time 12.02  
 TMRNUC 13C  
 PULPROG 5mm BIRD B1-1  
 FIDRES 7000.90  
 TD 65535  
 SOLVENT CDCl3  
 NS 74  
 DS 4  
 SFO1 100.6237989 MHz

159.436  
 158.081  
 134.775  
 128.519  
 113.998  
 107.290

77.551  
 77.234  
 76.916  
 76.281

55.431

30.403  
 23.371  
 22.474

===== CHANNEL f1 =====  
 NUC1 13C  
 P1 15.25 usec  
 PL1 3.00 dB  
 SFO1 100.6237989 MHz

===== CHANNEL f2 =====  
 CPDPRG2 MSLT216  
 NUC2 1H  
 P1 107.50 usec  
 PL2 0.00 dB  
 PL12 24.00 dB  
 PL13 24.00 dB  
 SFO2 400.1316005 MHz

F2 - Processing parameters  
 SI 32768  
 SF 100.617484 MHz  
 KHZ EN  
 MVM EN  
 SSB 0  
 LB 1.00 Hz  
 UB 0  
 PC 1.40

10 NMR plot parameters  
 CX 24.00 cm  
 FIP 220.000 ppm  
 F1 22134.80 Hz  
 F2P -10.000 ppm  
 FZ -1006.13 Hz  
 FREQM 9.58333 ppm/cm  
 HDN 984.20544 Hz/cm

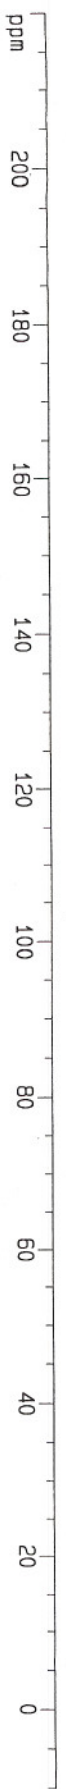

TES deprot Aplt

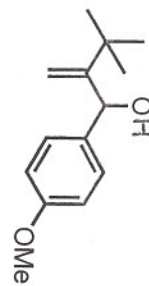

Current Data Parameters  
 NAME: NCV6-245de-A  
 EXPNO: 1  
 PROCNO: 1

F2 - Acquisition Parameters  
 Date\_: 20060808  
 Time: 16:27  
 INSTRUM: spect  
 PROBRW: 5mm BBO 50mm  
 PULPROG: zgpg30  
 TO: 65536  
 SOLVENT: CDCl3  
 NS: 4  
 DS: 2  
 SFO1: 8276.146 Hz  
 FIDRES: 0.126314 Hz  
 AQ: 3.9584243 sec  
 RG: 4  
 DM: 60.400 usec  
 DE: 6.00 usec  
 TE: 300.0 K  
 O1: 1.00000000 sec

\*\*\*\*\* CHANNEL f1 \*\*\*\*\*  
 NUC1: 1H  
 P1: 7.50 usec  
 PL1: 0.00 dB  
 SFO1: 400.1324710 MHz

F2 - Processing parameters  
 SI: 32768  
 SF: 400.1300000 MHz  
 WDW: EM  
 SSB: 0  
 LB: 0.30 Hz  
 GB: 0  
 PC: 1.00

1D NMR plot parameters  
 CX: 24.00 cm  
 FIP: 10.500 ppm  
 FI: 4204.36 Hz  
 FQP: -0.500 ppm  
 F2: -200.07 Hz  
 PPMCK: 0.42653 ppm/cm  
 HZCK: 153.32931 Hz/cm

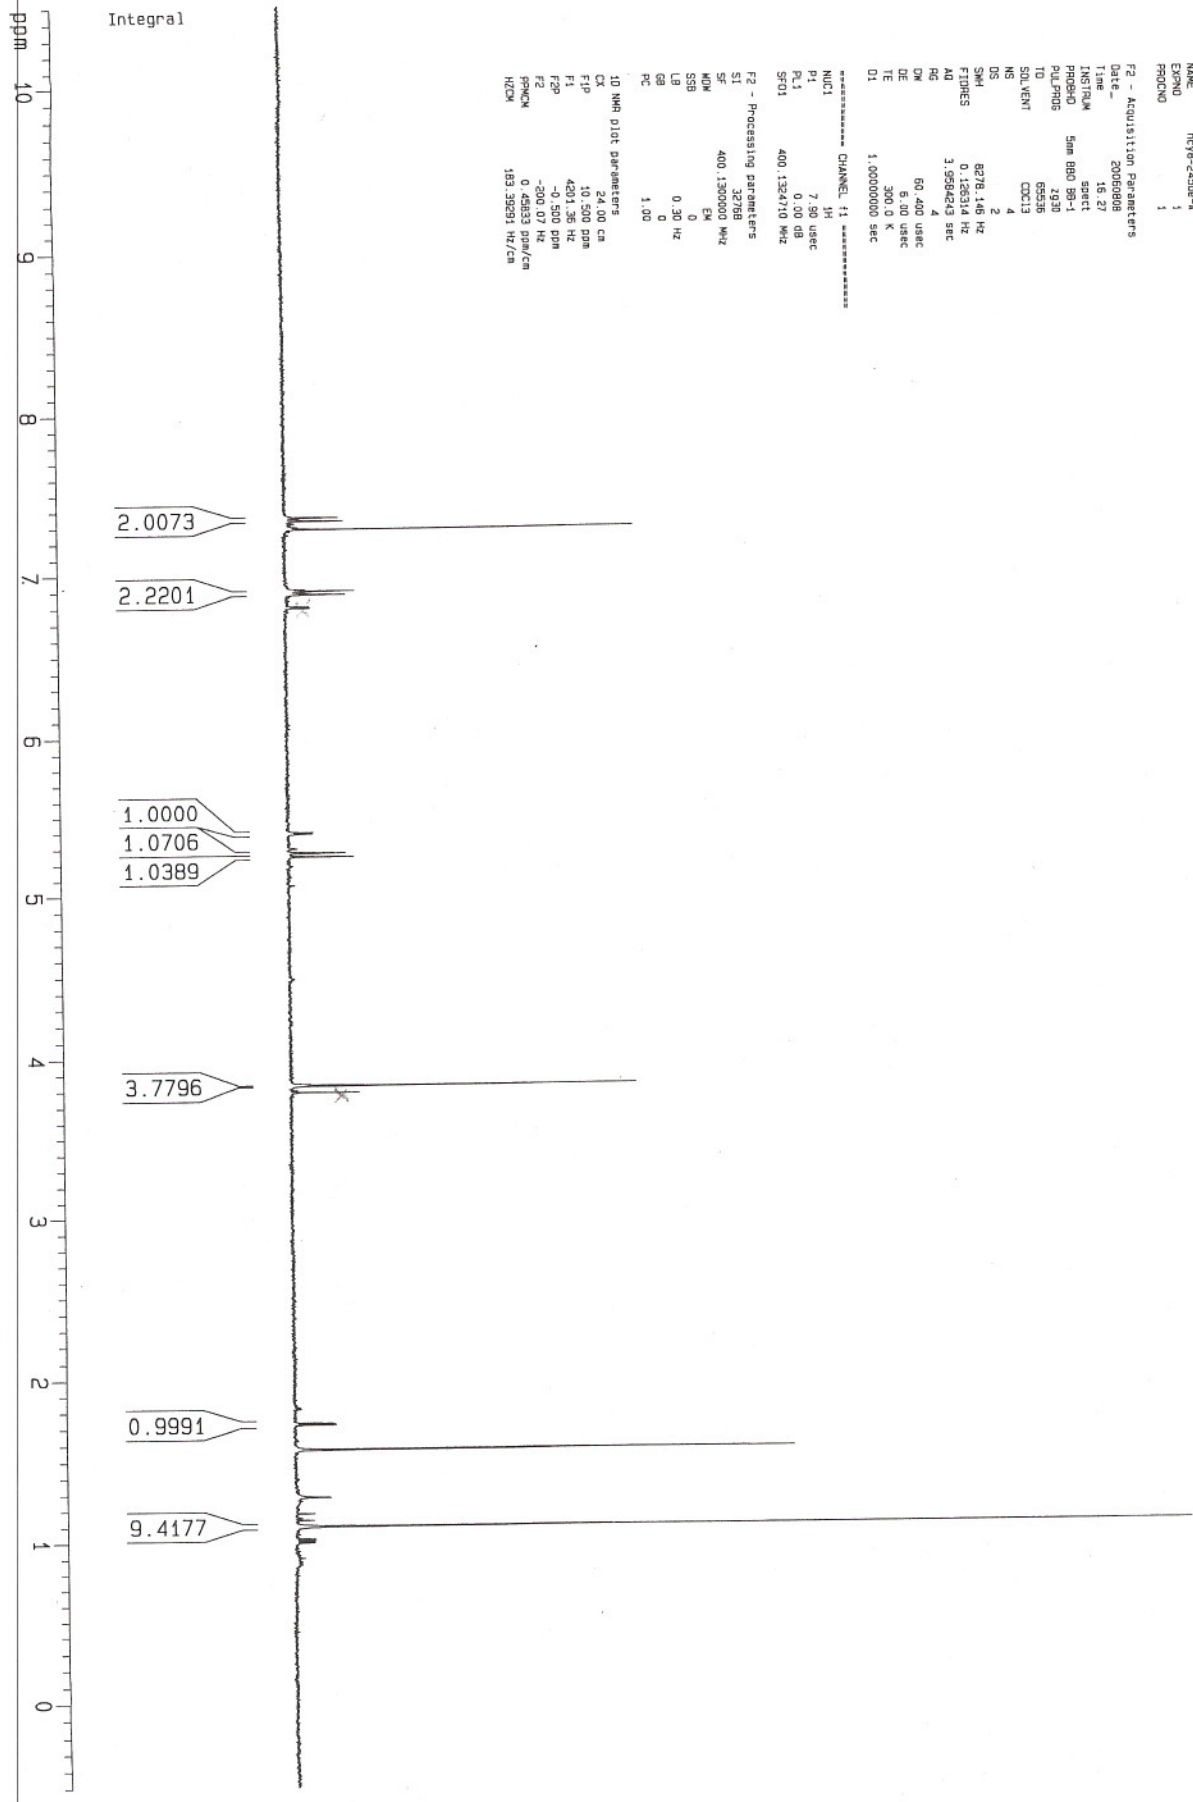



TES depot Apdt

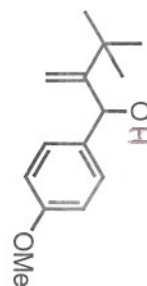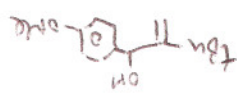

Current Data Parameters  
 NAME: NoyB-265e-A  
 EXPNO: 22  
 PROCNO: 1

F2 - Acquisition Parameters  
 Date\_: 20060608  
 Time: 19.50  
 INSTRUM: spect  
 PRRBHD: 5mm BB0 BB-1  
 PULPROG: zgpg30  
 TO: 65536  
 SOLVENT: CDCl3  
 NS: 14180  
 DS: 4  
 SMH: 24875.621 Hz  
 FIDRES: 0.379392 Hz  
 AQ: 1.317858 sec  
 RG: 1.317858  
 DW: 20.100 usec  
 DE: 6.00 usec  
 TE: 300.0 K  
 D1: 2.00000000 sec  
 d11: 0.03000000 sec  
 d12: 0.00002000 sec

===== CHANNEL f1 =====  
 NUC1: 13C  
 P1: 15.29 usec  
 PL1: 3.00 dB  
 SF01: 100.627959 MHz

===== CHANNEL f2 =====  
 CPDPRG2: waltz16  
 NUC2: 1H  
 P2: 107.50 usec  
 PL2: 0.00 dB  
 PL12: 24.00 dB  
 PL13: 24.00 dB  
 SF02: 400.1316005 MHz

F2 - Processing parameters  
 SI: 32768  
 SF: 100.6127461 MHz  
 MDW: EM  
 SSB: 0  
 LB: 1.00 Hz  
 GB: 0  
 PC: 1.40

1D NMR plot parameters  
 CK: 24.00 cm  
 FK: 250.00 rpm  
 F1P: 228.000 Hz  
 F2P: 110.000 rpm  
 F2: -1006.13 Hz  
 RPWCM: 9.56333 rpm/cm  
 NZCM: 964.20544 Hz/cm

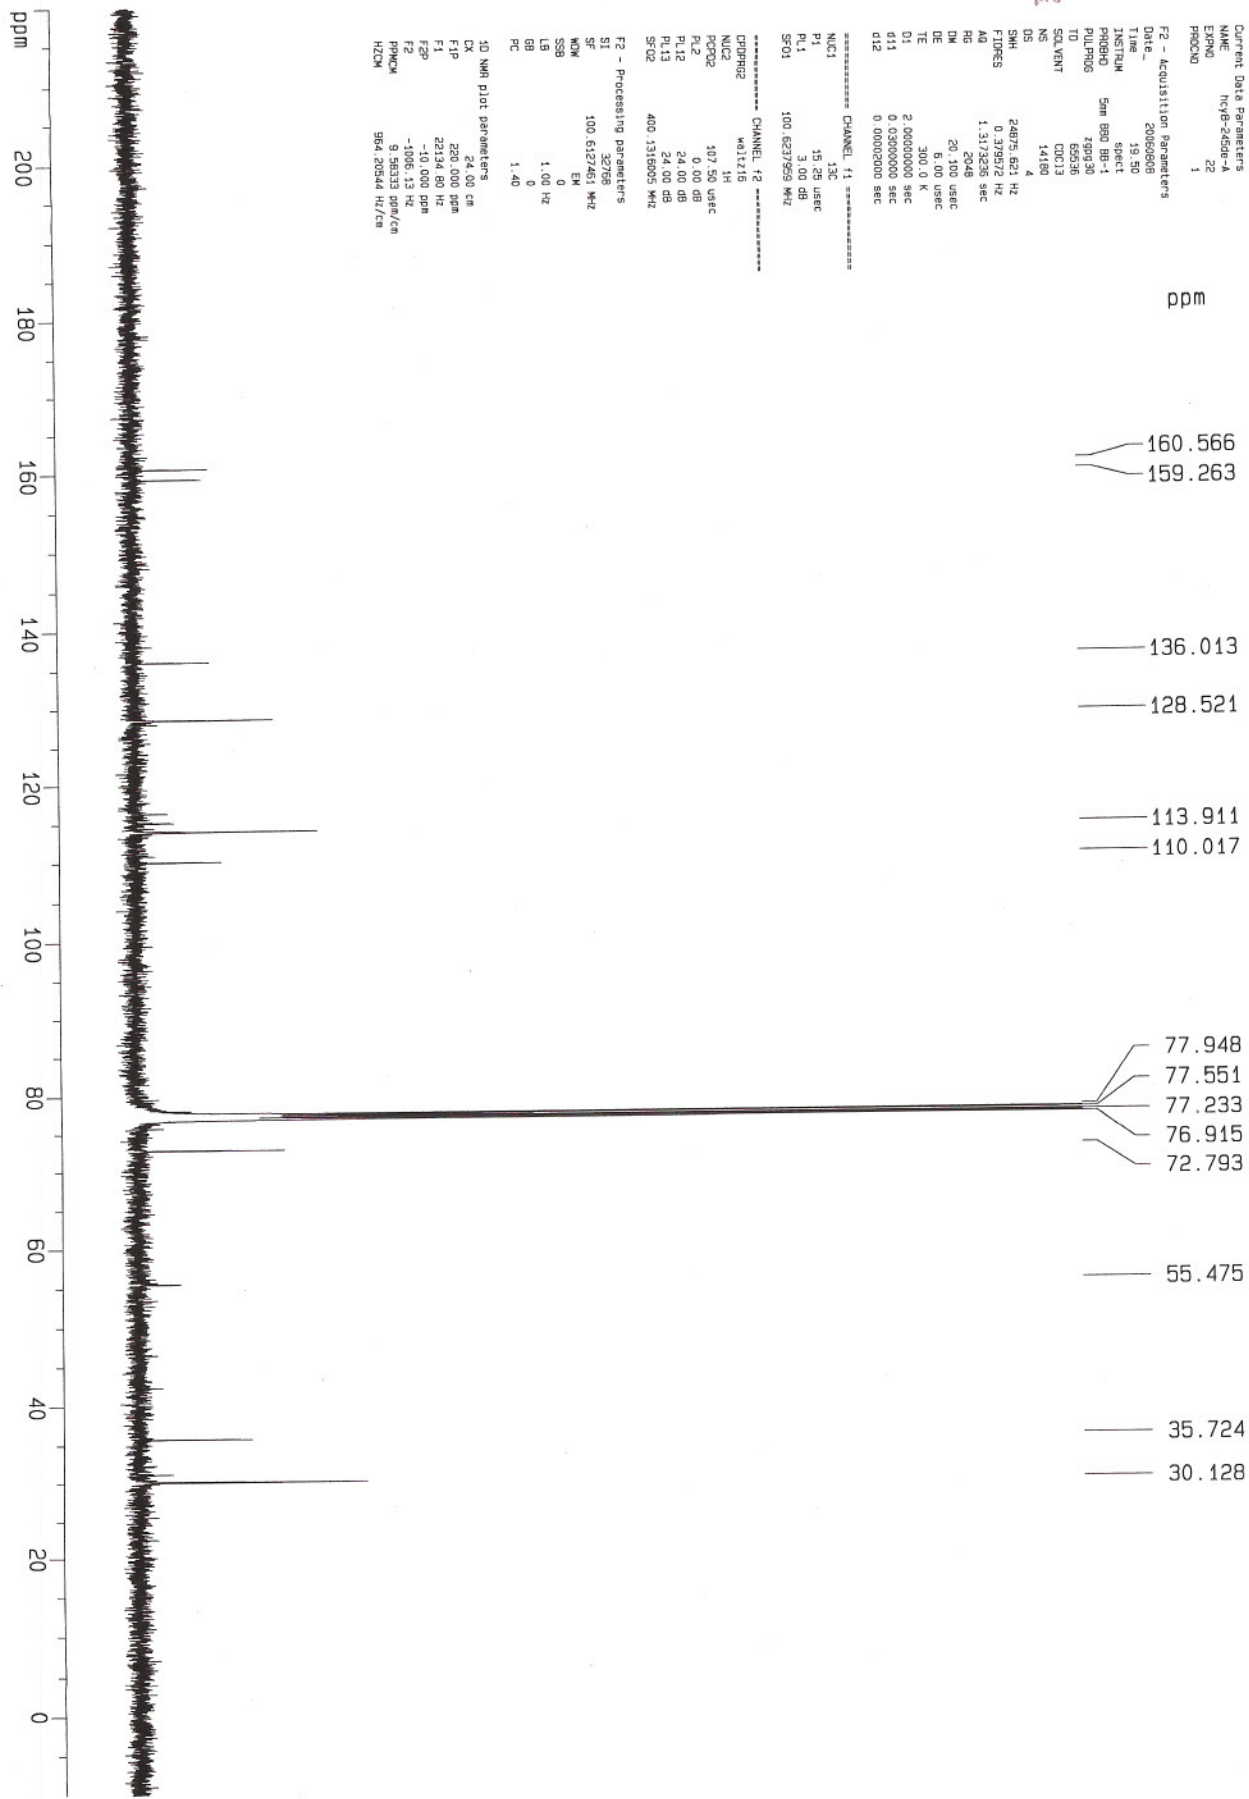

- 160.566
- 159.263
- 136.013
- 128.521
- 113.911
- 110.017
- 77.948
- 77.551
- 77.233
- 76.915
- 72.793
- 55.475
- 35.724
- 30.128

db TES de A-pdt

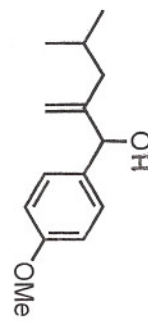

Current Data Parameters  
 Name: h2y8230308-4  
 Exp: 1  
 PROCNO: 1

F2 - Acquisition Parameters  
 Date\_: 20060728  
 Time: 17.54  
 INSTRUM: spect  
 PROBHD: 5 mm QNP 1H/1  
 PULPROG: zg30  
 TD: 65536  
 SOLVENT: CDCl3  
 NS: 5  
 DS: 1  
 SWH: 8278.146 Hz  
 FIDRES: 0.186314 Hz  
 AQ: 3.594843 sec  
 RG: 228.1  
 DM: 80.400 usec  
 DE: 254.9  
 TE: 304.2  
 D1: 1.00000000 sec  
 MDC18: 0.00000000 sec  
 MCK8K: 0.01500000 sec

===== CHANNEL f1 =====  
 NUC1: 1H  
 P1: 9.88 usec  
 PL1: 3.00 dB  
 SF01: 400.1324710 MHz

F2 - Processing parameters  
 SI: 32768  
 SF: 400.1300054 MHz  
 WM: EM  
 SSB: 0  
 LB: 0.30 Hz  
 GB: 0  
 PC: 1.00

10 NMR plot parameters  
 CX: 24.00 cm  
 CY: 6.88 cm  
 FIP: 10.500 ppm  
 F1: 4201.36 Hz  
 F2: -200.07 Hz  
 PPM1H: 0.45833 ppm/cm  
 N2DM: 183.38231 Hz/cm

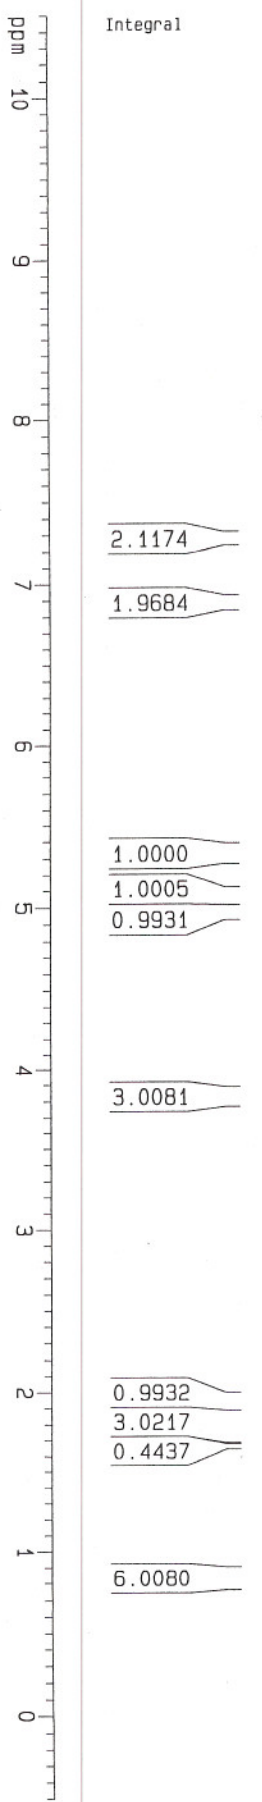

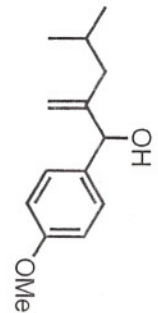

Current Data Parameters  
 NAME ncv8-258bde-1  
 EXPNO 2  
 PROCNO 1

F2 - Acquisition Parameters  
 Date\_ 2006/07/28  
 Time 17:39  
 INSTRUM spect  
 PROBR0 5 mm QNP 1H/1  
 PULPROG zgpg30  
 TO 65536  
 SOLVENT CDCl3  
 NS 187  
 DS 4

SMH 22980.814 Hz  
 FIDRES 0.365918 Hz  
 AQ 1.3664756 sec  
 RG 3251  
 DW 20.950 usec  
 DE 6.00 usec  
 TE 294.2 K  
 D1 2.0000000 sec  
 d11 0.0300000 sec  
 DELTA 1.2000000 sec  
 MISCST 0.0000000 sec  
 KICK 0.0150000 sec

\*\*\*\*\* CHANNEL f1 \*\*\*\*\*  
 NUC1 13C  
 P1 8.50 usec  
 PL1 3.00 dB  
 SFO1 100.6282698 MHz

\*\*\*\*\* CHANNEL f2 \*\*\*\*\*  
 CPDPRG2 waltz16  
 NUC2 1H  
 P2 88.01 usec  
 PL2 3.00 dB  
 PL12 22.00 dB  
 PL13 22.00 dB  
 SFO2 400.1463003 MHz

F2 - Processing parameters  
 SI 32768  
 SF 100.6127513 MHz  
 KW 64  
 SSB 0  
 LB 1.00 Hz  
 GB 0  
 PC 1.40

1D NMR1 plot parameters  
 CX 24.00 cm  
 CY 5.24 cm  
 F1P 219.353 ppm  
 F1 25089.57 Hz  
 F2 -191.45 ppm  
 F2 9.53115 ppm/cm  
 PPMCK 999.20074 Hz/cm  
 KZCM

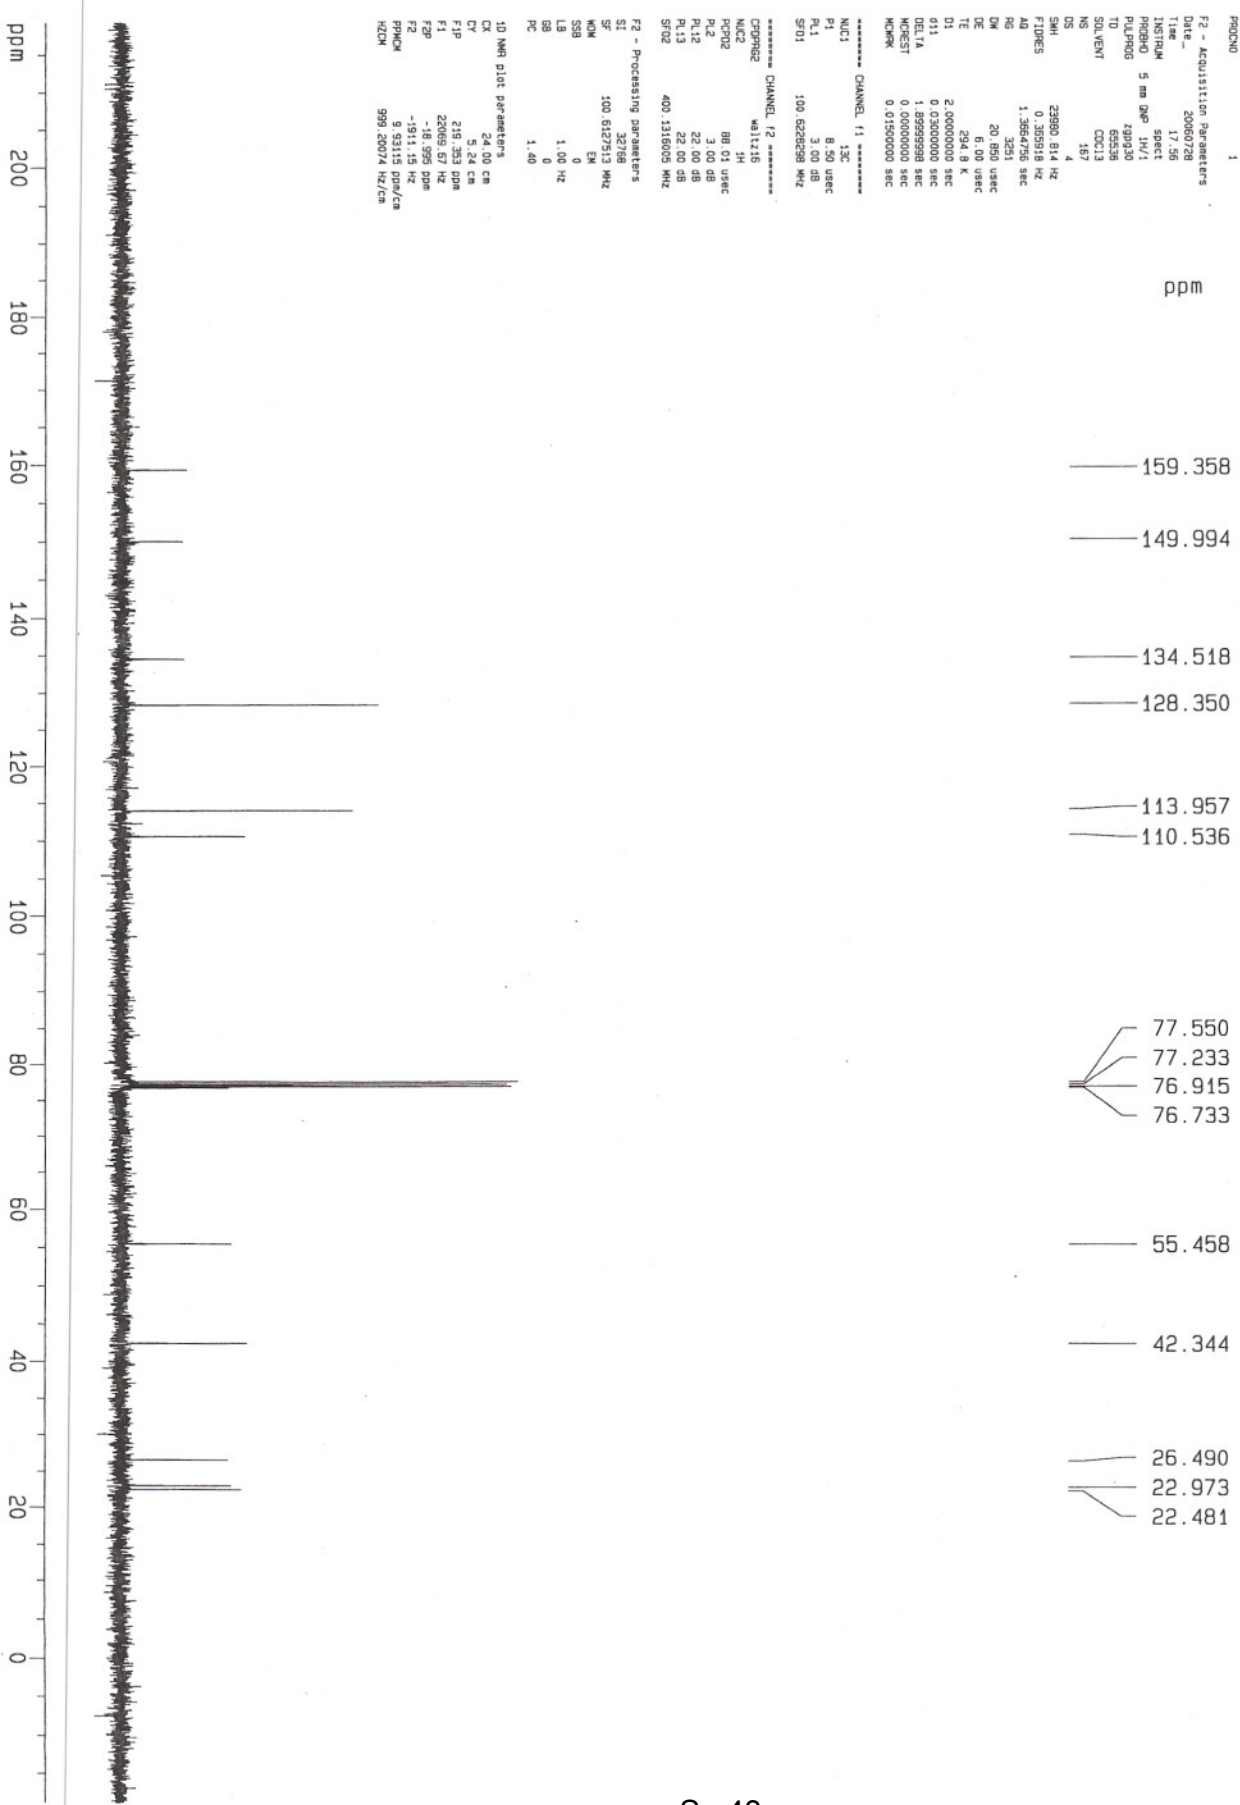

diene TES deprotected A.pdt

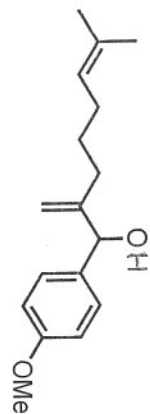

Current Data Parameters  
 NAME hcv8-2500e-d1-10  
 EXPNO 1  
 PROCNO 1

F2 - Acquisition Parameters  
 Date\_ 20060727  
 Time 18:47  
 INSTRM spect  
 PROBO 5 mm QNP 1H/1  
 PULPROG zg30  
 TO 65536  
 SOLVENT CDCl3  
 NS 4  
 DS 1  
 SWH 8278.146 Hz  
 FIDRES 0.126314 Hz  
 AQ 3.3594643 sec  
 RG 628  
 HS 54.000 usec  
 HM 5.00 usec  
 TE 293.7 K  
 D1 1.00000000 sec  
 D11 0.00000000 sec  
 ACQRES 0.01500000 sec  
 KICKER

\*\*\*\*\* CHANNEL f1 \*\*\*\*\*  
 NUC1 1H  
 P1 9.88 usec  
 PL1 3.00 dB  
 SF01 400.1324710 MHz

F2 - Processing parameters  
 SI 400.130054 MHz  
 SF 400.1324710 MHz  
 WHW EM  
 SSB 0  
 LB 0.30 Hz  
 BB 0  
 PC 1.00

10 NMR list parameters  
 CX 24.00 cm  
 CY 7.94 cm  
 F1P 10.500 ppm  
 F1 4201.36 Hz  
 F2P -0.500 ppm  
 F2 -20.7 Hz  
 PWDW 0.00000000 sec  
 PWDW 149.38931 Hz/cm  
 HZCM

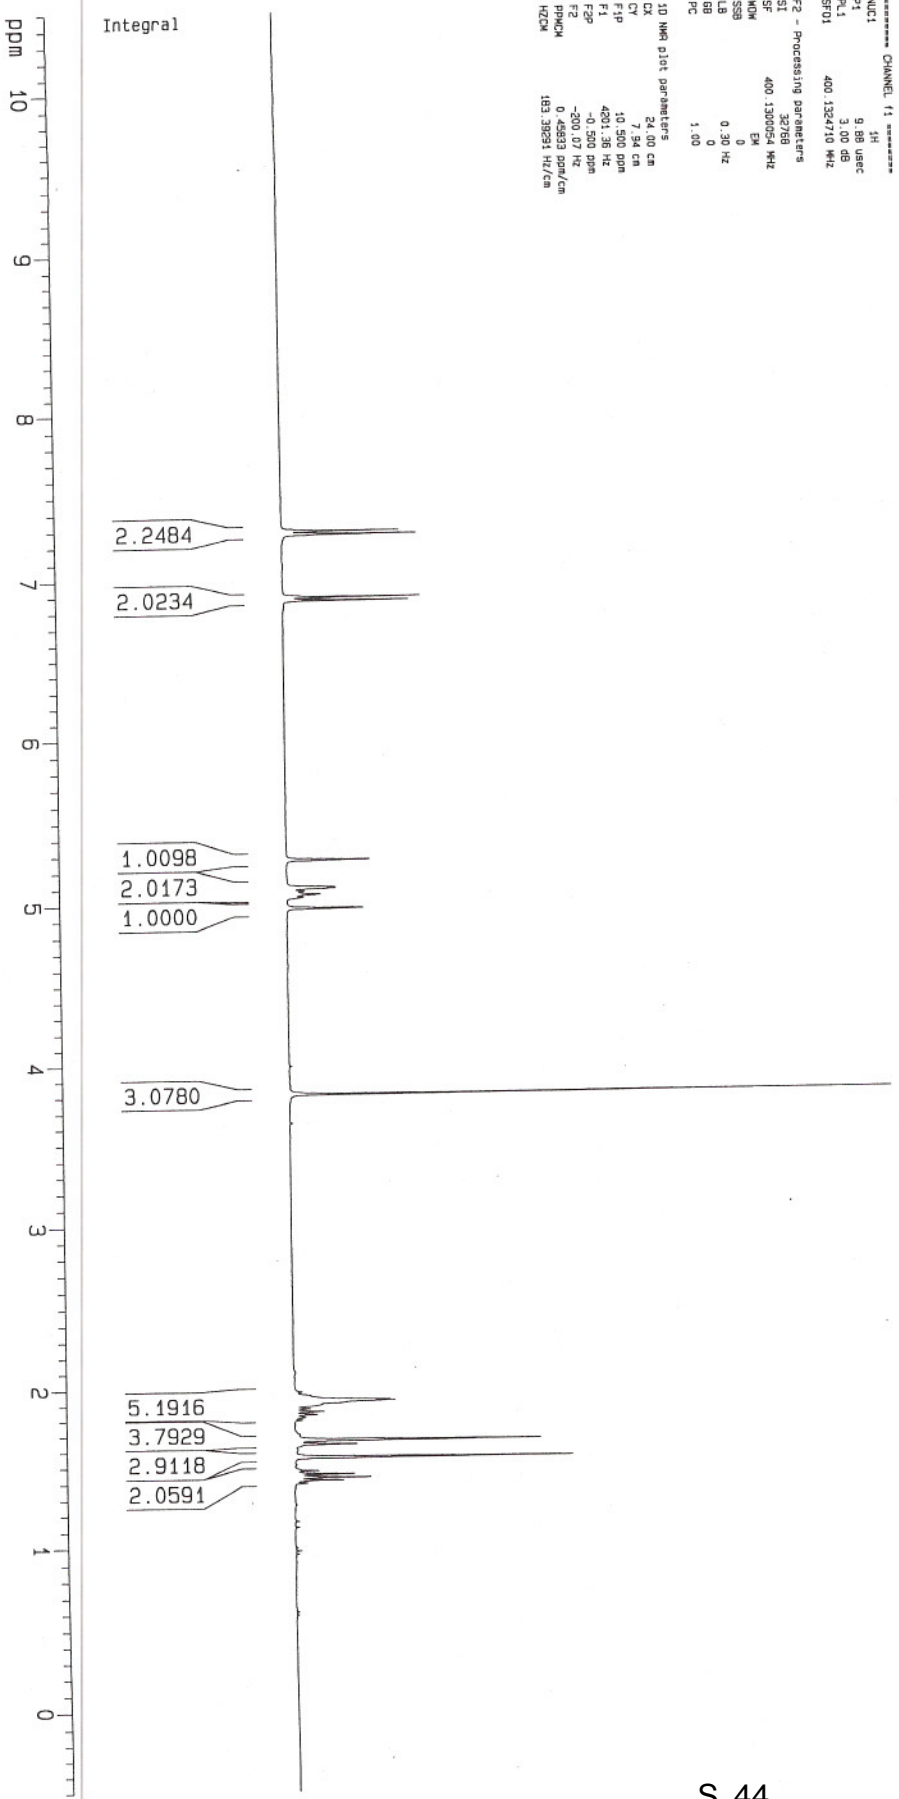

diene TES deprotected A.pdt

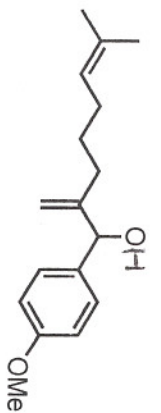

Current Data Parameters  
 NAME hc98-2566-d1-A  
 EXPNO 2  
 PROCNO 1

F2 - Acquisition Parameters  
 Date\_ 20060727  
 Time 18:51  
 INSTRUM spect  
 PROBHD 5 mm QNP 1H/1  
 PULPROG zgpg30  
 TO 65935  
 SOLVENT CDCl3  
 NS 123  
 DS 4  
 SM 23980.014 Hz  
 FIDRES 0.365918 Hz  
 AQ 1.3664795 sec  
 RG 3231  
 DM 20.000 usec  
 DE 28.00 usec  
 TE 28.00 K  
 TD 2.0000000 sec  
 d11 0.0300000 sec  
 DELTA 1.8999999 sec  
 KCREST 0.0000000 sec  
 MCPXK 0.0150000 sec

\*\*\*\*\* CHANNEL f1 \*\*\*\*\*  
 NUC1 13C  
 P1 6.50 usec  
 PL1 3.00 dB  
 SFO1 100.6262598 MHz

\*\*\*\*\* CHANNEL f2 \*\*\*\*\*  
 CPDPRG2 waltz16  
 NUC2 1H  
 P2 88.01 usec  
 PL2 3.00 dB  
 PL12 22.00 dB  
 PL13 22.00 dB  
 SFO2 400.1316005 MHz

F2 - Processing parameters  
 SI 32768  
 SF 100.6127513 MHz  
 MW EM  
 SSB 0  
 LB 1.00 Hz  
 GB 0  
 PC 1.40

1D NMR Plot Parameters  
 CX 24.00 cm  
 CY 5.36 cm  
 FIP 219.353 ppm  
 FI 22089.87 Hz  
 F2P -18.995 ppm  
 F2 -1911.15 Hz  
 PPMCM 9.53115 ppm/cm  
 HZCM 999.20074 Hz/cm

- 159.334
- 151.385
- 134.548
- 131.854
- 128.211
- 124.530
- 113.946
- 109.356
- 77.546
- 77.229
- 76.983
- 76.911
- 55.465
- 31.850
- 28.183
- 27.943
- 25.906
- 17.891

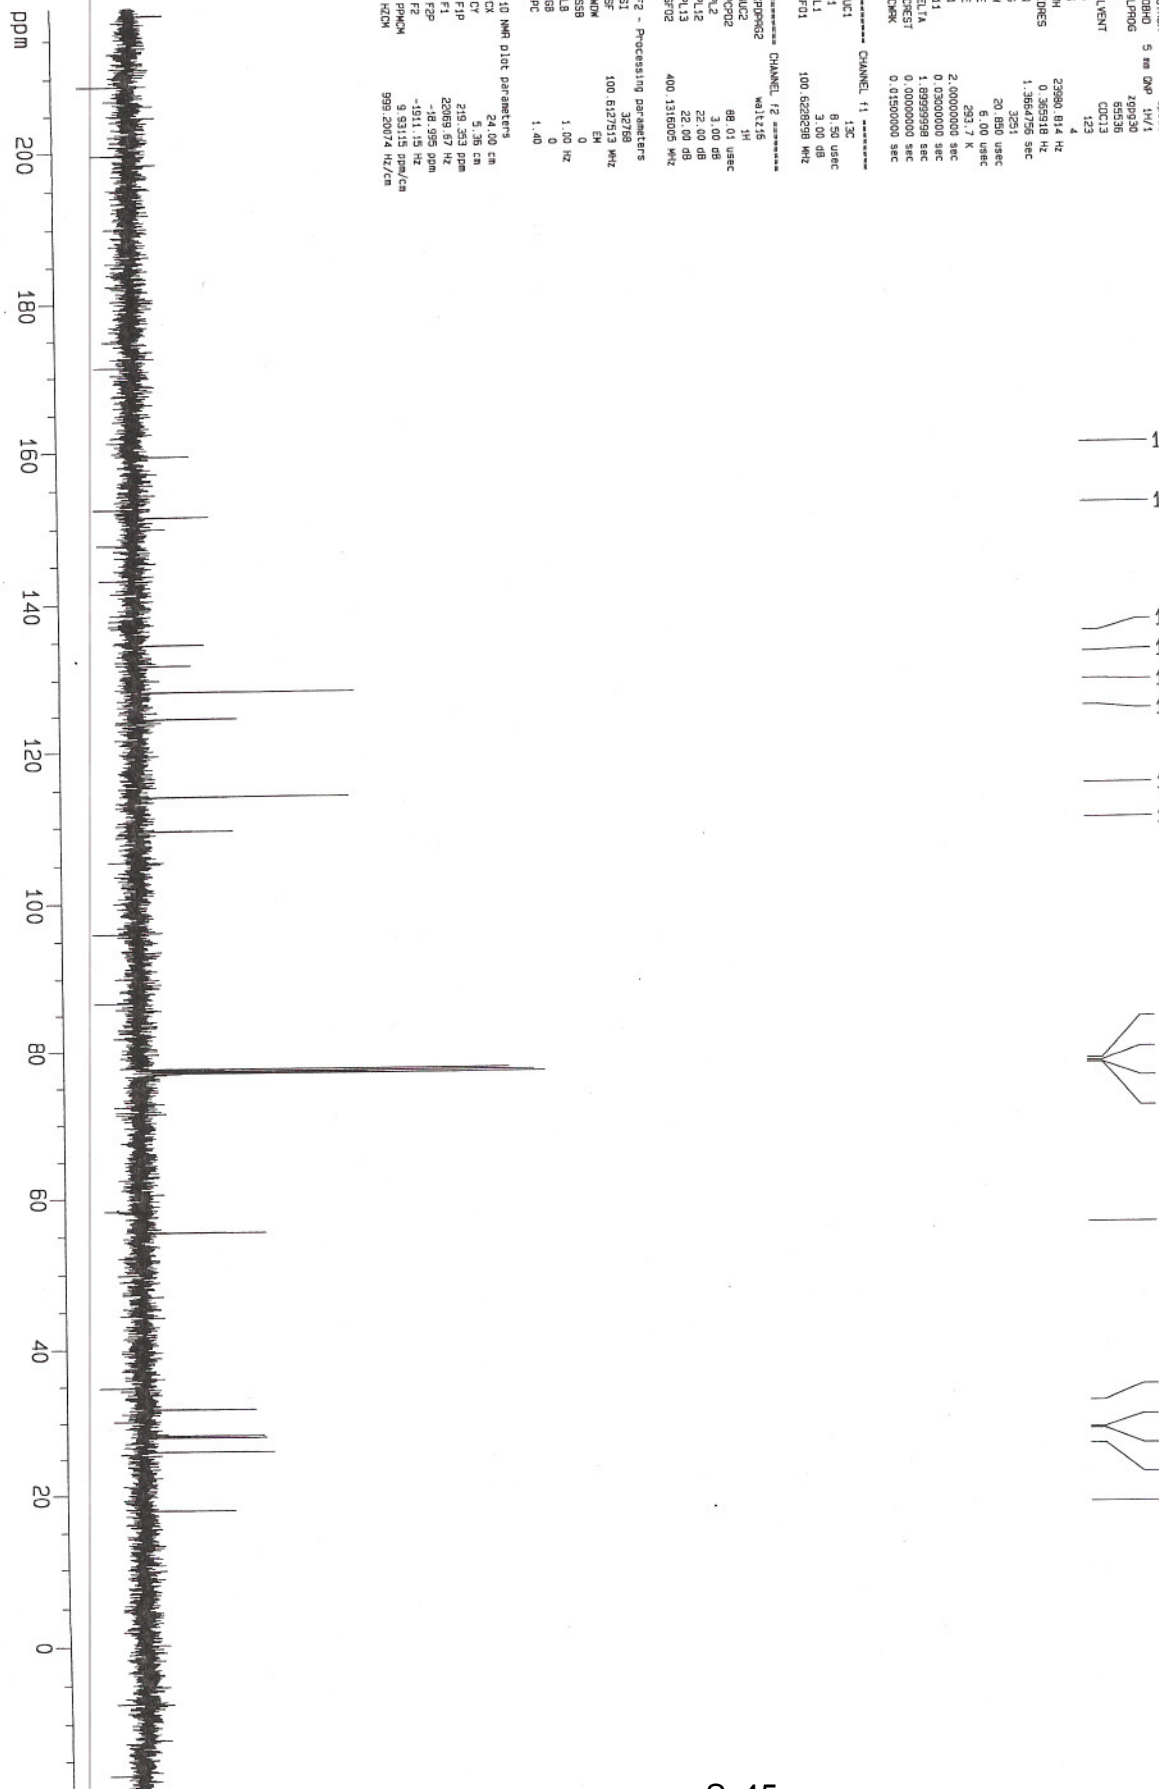

2-NpCHO A-pdt

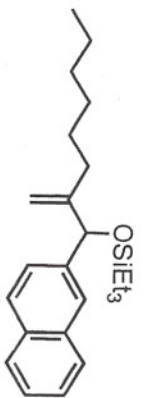

Current Data Parameters  
 NAME hcr18-2340-Np  
 EXPNO 1  
 PROCNO 1

F2 - Acquisition Parameters  
 Date\_ 20060725  
 Time 20.04  
 INSTRUM spect  
 PROBR0 5 mm QNP 1H/1  
 PULPROG zg30  
 TD 65536  
 SOLVENT CDCl3  
 NS 8  
 DS 1  
 SWH 8278.146 Hz  
 FIDRES 0.9534 Hz  
 AQ 3.0964243 sec  
 RG 143.7  
 DM 50.400 usac  
 DE 6.00 usac  
 TE 293.7 K  
 D1 1.00000000 sec  
 MCPRST 0.00000000 sec  
 MCNMR 0.01500000 sec

\*\*\*\*\* CHANNEL f1 \*\*\*\*\*  
 NUC1 1H  
 P1 9.88 usac  
 PL1 3.00 dB  
 SF01 400.1324710 MHz

F2 - Processing Parameters  
 SI 32768  
 SF 400.1300024 MHz  
 WHW 64  
 SSB 0  
 LB 0.30 Hz  
 GB 0  
 PC 1.00

10 NMR plot parameters  
 CX 24.00 cm  
 CY 6.41 cm  
 F1P 10.500 DPM  
 F1 4201.36 Hz  
 F2P -0.500 DPM  
 F2 -200.07 Hz  
 PPMCN 0.45833 DPM/cm  
 HZCN 183.39291 HZ/cm

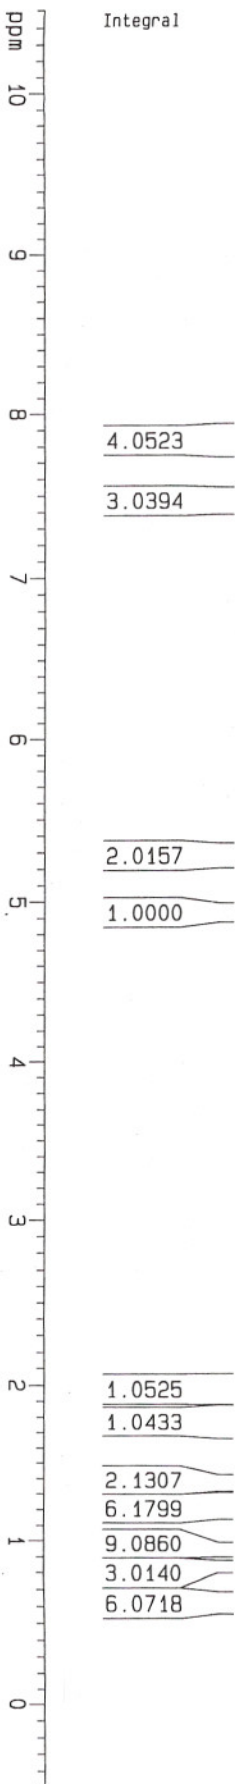

2-NpCHO A-Pdt

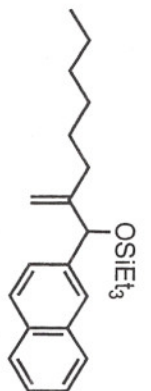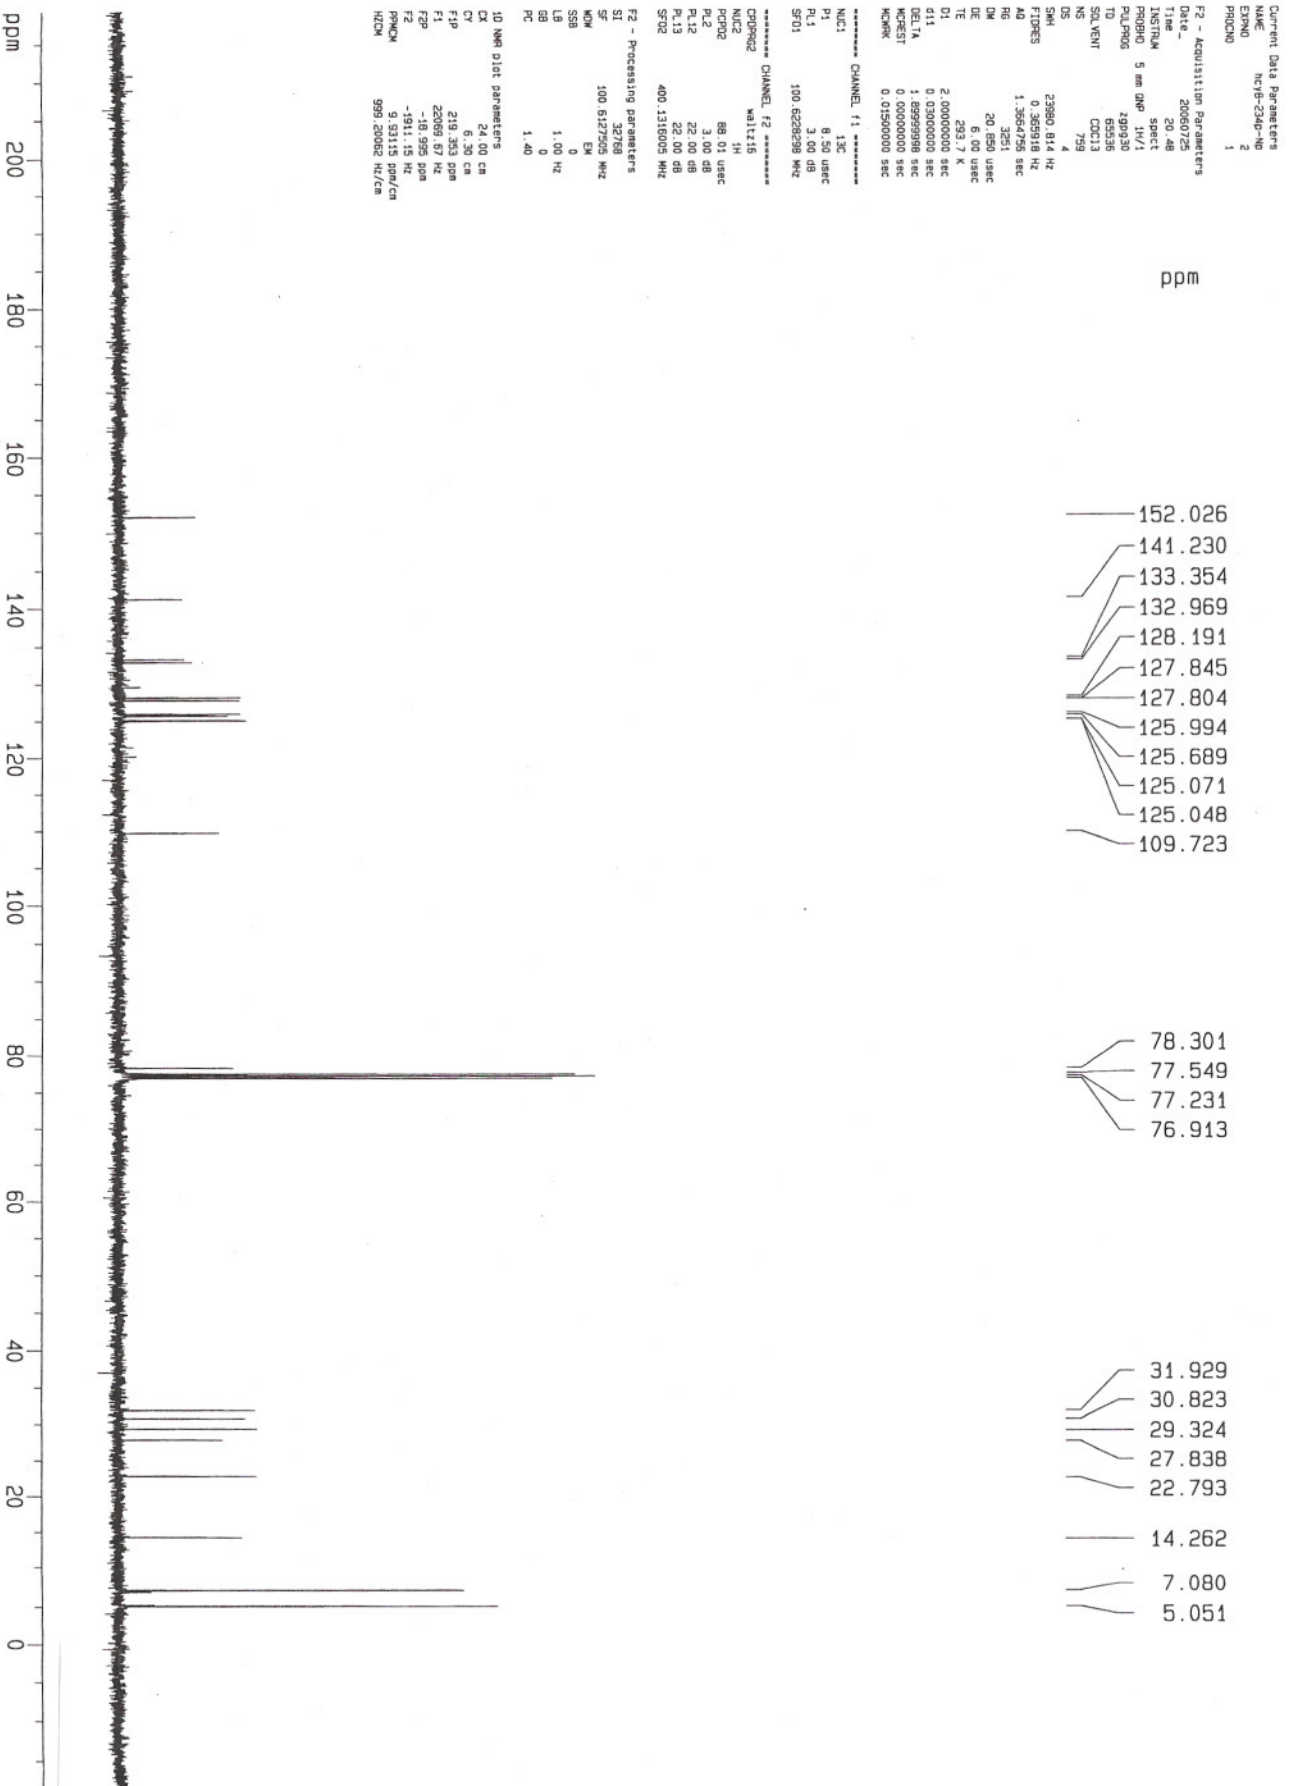

C1-Apdt

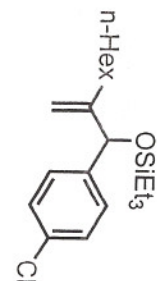

Current Data Parameters  
NAME: NSP-2401-Apdt  
EXPNO: 1  
PROCNO: 1

F2 - Acquisition Parameters  
Date\_: 20060807  
Time: 16.56  
INSTRUM: spect  
PROBHD: 5mm BBO BB-1  
PULPROG: zg30  
TO: 65536  
SOLVENT: CDCl<sub>3</sub>  
NS: 6  
DS: 2  
SMH: 8278.146 Hz  
FIDRES: 0.128314 Hz  
AQ: 3.926243 sec  
RG: 640  
WDW: EM  
SSB: 0  
GB: 0  
PC: 6.00 usec  
TE: 300.0 K  
D1: 1.00000000 sec

\*\*\*\*\* CHANNEL f1 \*\*\*\*\*  
NUC1: 1H  
P1: 7.50 usec  
PL1: 0.00 dB  
SFO1: 400.1324710 MHz

F2 - Processing parameters  
SI: 32768  
SF: 400.1300000 MHz  
WDW: EM  
SSB: 0  
LB: 0.30 Hz  
GB: 0  
PC: 1.00  
ID: NMR plot parameters  
CY: 24.00 cm  
FIP: 10.500 ppm  
F1: 4201.36 Hz  
F2: -0.500 ppm  
F2: -200.07 Hz  
PPMCK: 0.48833 ppm/cm  
HZCM: 183.39291 Hz/cm

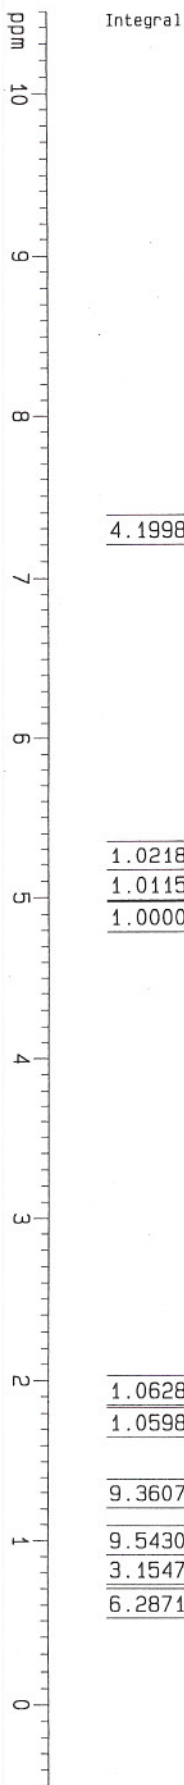



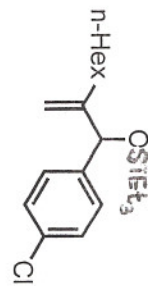

Current Data Parameters  
 NAME NCVS-243C1-4ad  
 EXPNO 2  
 PRICHO 1  
 F2 - Acquisition Parameters  
 Date\_ 20060907  
 Time 17.33  
 INSTRUM spect  
 PROBHD 5mm BBO BB-1  
 PULPROG zgpg30  
 TO 65535  
 SOLVENT CDCl<sub>3</sub>  
 NS 762  
 DS 4  
 SWH 24875.621 Hz  
 FIDRES 0.378572 Hz  
 AQ 1.317235 sec  
 RG 2048  
 DM 20.100 usec  
 DE 6.00 usec  
 TE 300.0 K  
 O1 2.00000000 sec  
 d11 0.03000000 sec  
 d12 0.00020000 sec

\*\*\*\*\* CHANNEL f1 \*\*\*\*\*  
 NUC1 13C  
 P1 15.25 usec  
 PL1 3.00 dB  
 SF01 100.627959 MHz

\*\*\*\*\* CHANNEL f2 \*\*\*\*\*  
 CPDPRG2 waltz16  
 NUC2 1H  
 P2 107.50 usec  
 PL2 0.00 dB  
 PL12 24.00 dB  
 PL13 24.00 dB  
 SF02 400.1316005 MHz

F2 - Processing parameters  
 SI 32768  
 SF 100.6127469 MHz  
 KW EM  
 SSB 0  
 LB 1.00 Hz  
 GB 0  
 PC 1.40  
 ID NMR plot parameters  
 SI 32768  
 SF 100.6127469 MHz  
 F1 23134.80 Hz  
 F2 -10.000 ppm  
 F2 -1006.13 Hz  
 PSICH 9.8533 ppm/cm  
 HZCM 564.20544 Hz/cm

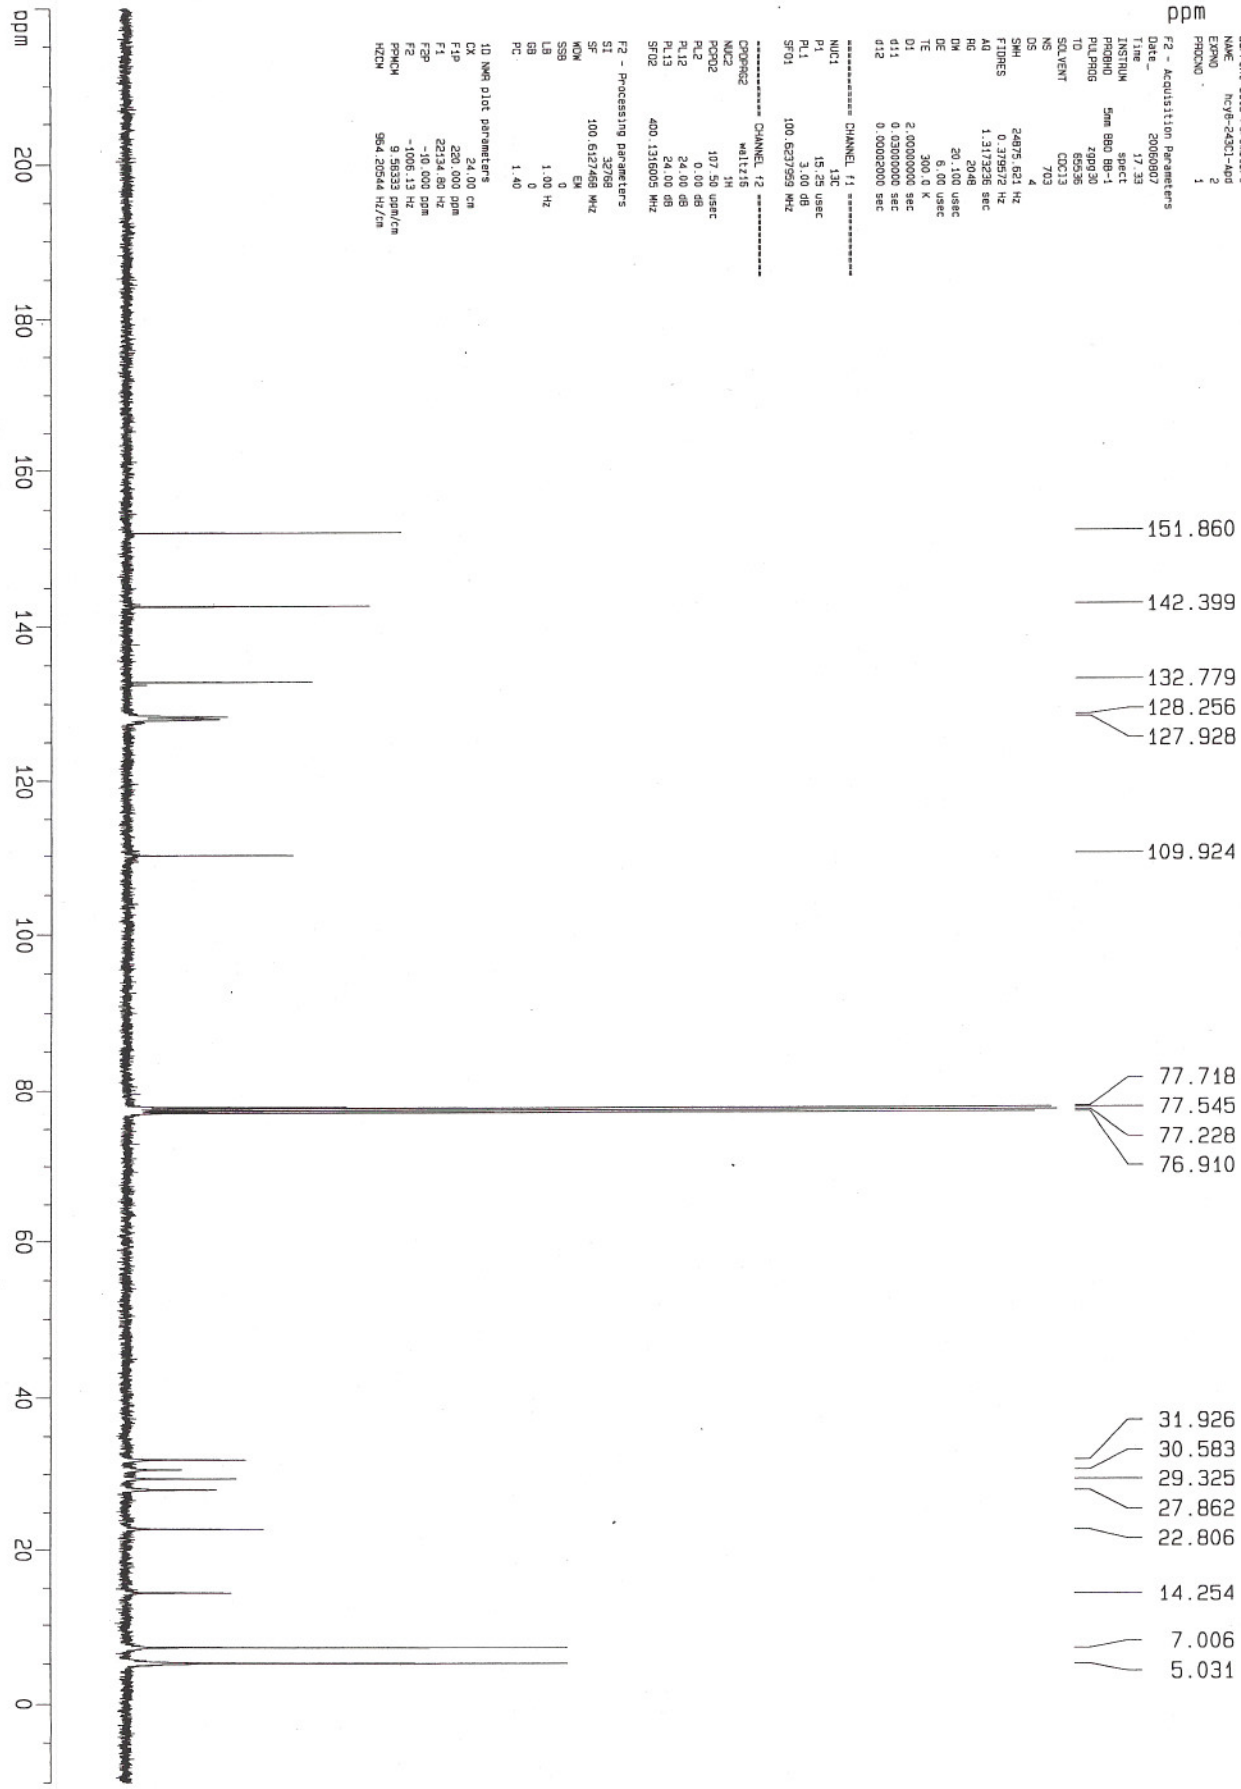

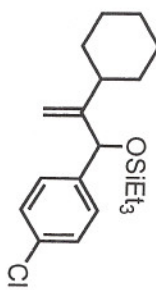

Cl-4pdt

W14-R-2421-10 10 10 10 10

Current Data Parameters  
 NAME hc19-2421-10d  
 EXPNO 1  
 PROCNO 1

F2 - Acquisition Parameters  
 Date\_ 20060907  
 Time 10:55  
 INSTRUM spect  
 PROBRD 5mm BBO BB-1  
 PULPROG zg30  
 TD 65536  
 SOLVENT CDCl3  
 NS 5  
 DS 2  
 SMH 8278.146 Hz  
 FIDRES 0.126314 Hz  
 AQ 3.594243 sec  
 SFO1 161.3  
 F2 60.400 usec  
 DE 6.00 usec  
 TE 300.2 K  
 D1 1.00000000 sec

\*\*\*\*\* CHANNEL f1 \*\*\*\*\*  
 NUC1 1H  
 P1 7.50 usec  
 PL1 0.00 dB  
 SFO1 400.1324710 MHz

F2 - Processing parameters  
 SI 32768  
 SF 400.1300000 MHz  
 MDW EM  
 SSB 0  
 LB 0.30 Hz  
 GB 0  
 PC 1.00

10 NMR plot parameters  
 CK 24.00 cm  
 F1P 10.500 ppm  
 F2 4201.30 Hz  
 F2P -300.07 Hz  
 SFOCK 0.48833 ppm/cm  
 HZCK 183.35261 Hz/cm

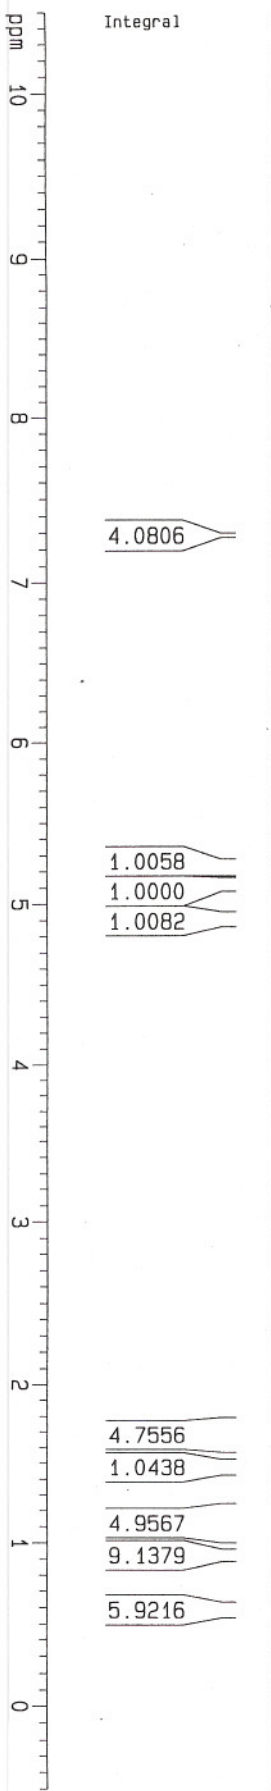

C1-Addt

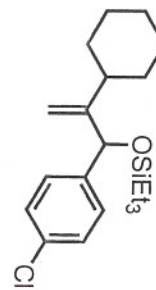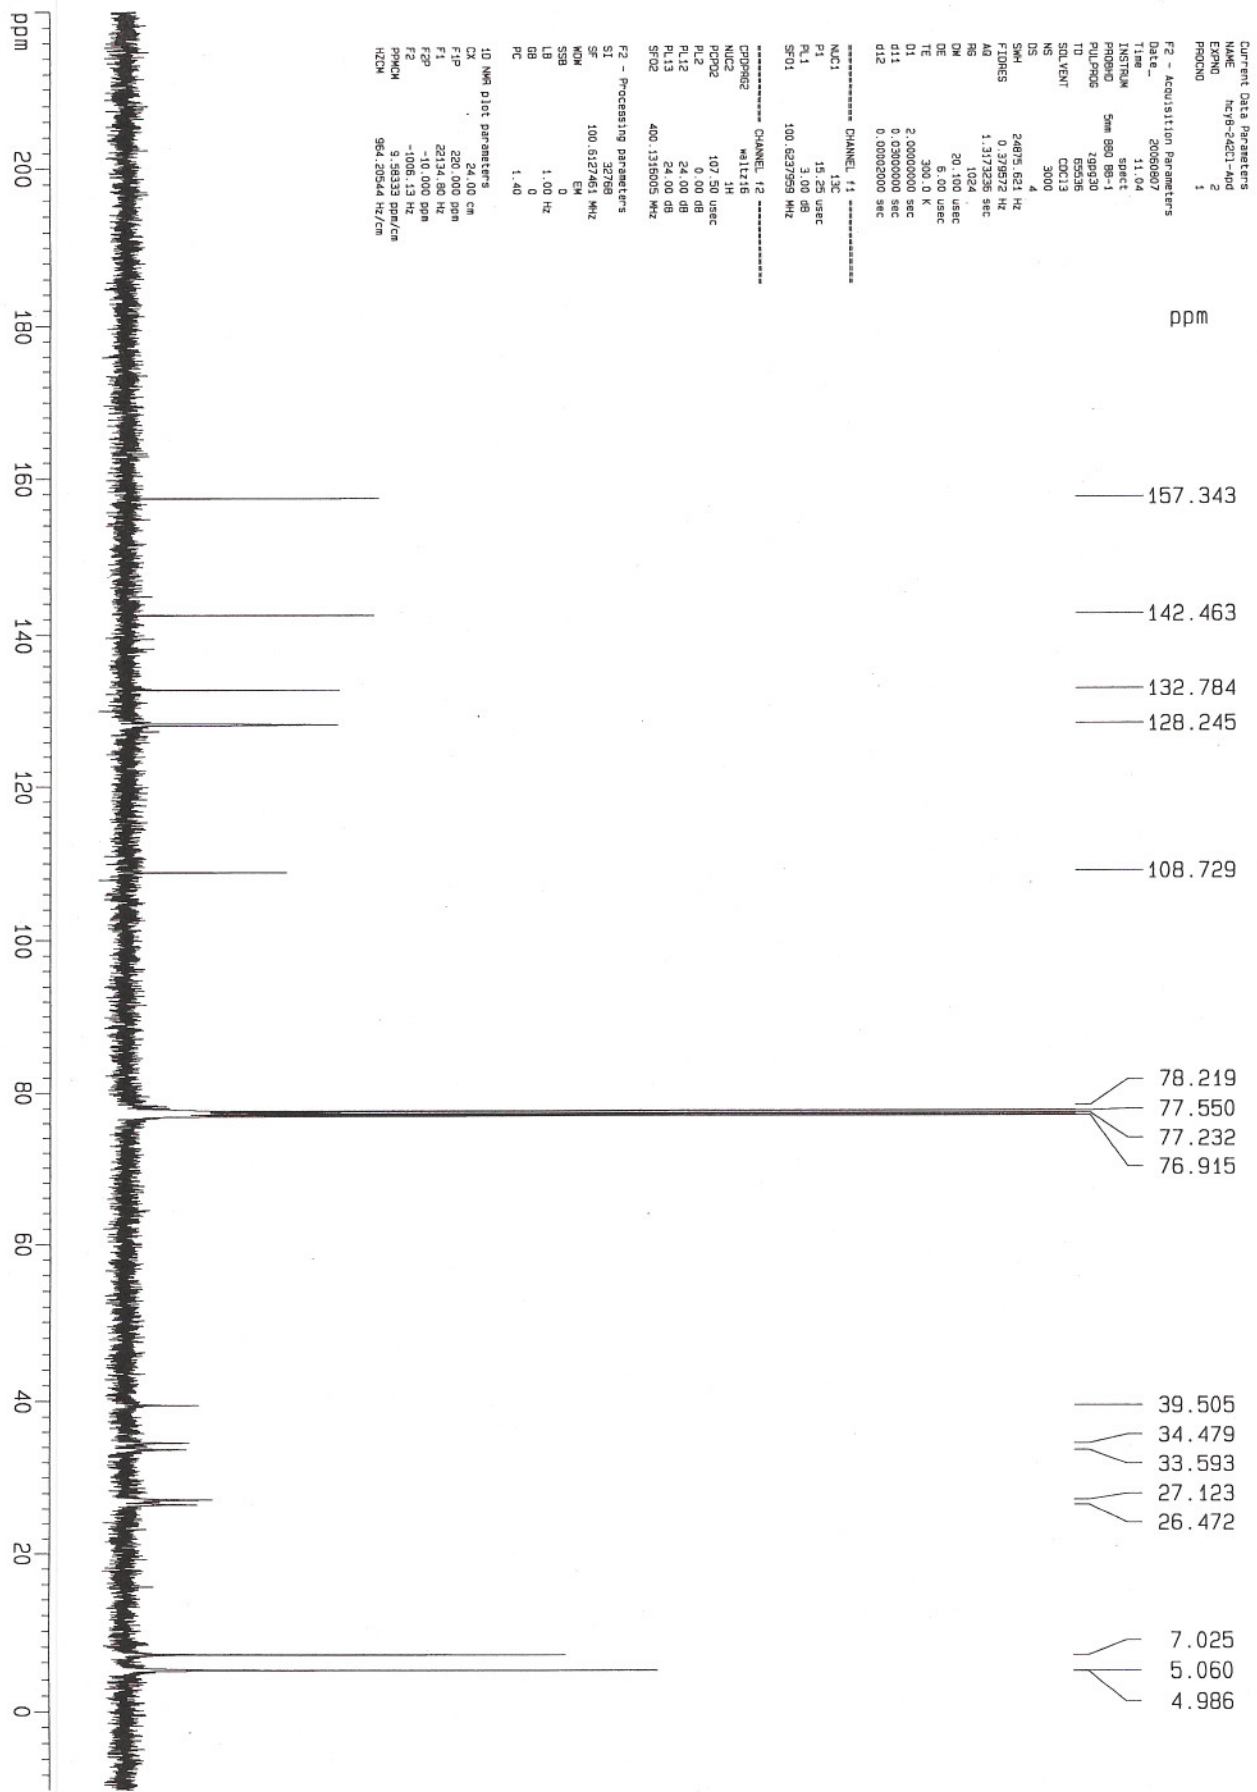

Current Data Parameters  
 NAME hc19-24ct1-Add  
 EXPNO 2  
 PROCNO 1  
 F2 - Acquisition Parameters  
 Date\_ 20060907  
 Time 11.04  
 INSTRUM spect  
 PROBRF 5mm BBO BB-1  
 PULPROG zgpg30  
 PD 65235  
 PC 3000  
 SOLVENT CDCl3  
 NS 4  
 DS 4  
 SFO1 24875.621 Hz  
 FIDRES 0.376572 Hz  
 AQ 1.317236 sec  
 RG 1024  
 DM 20.100 usec  
 DE 6.00 usec  
 TE 300.0 K  
 D1 2.00000000 sec  
 d11 0.03000000 sec  
 d12 0.00020000 sec

===== CHANNEL f1 =====  
 NUC1 13C  
 P1 15.25 usec  
 PL1 3.00 dB  
 SF01 100.6273599 MHz

===== CHANNEL f2 =====  
 CPDPRG2 waltz16  
 NUC2 1H  
 P2 107.50 usec  
 PL2 0.00 dB  
 PL12 24.00 dB  
 PL13 24.00 dB  
 SF02 400.1316005 MHz

F2 - Processing parameters  
 SI 32768  
 SF 100.6127461 MHz  
 MVM EM  
 SSB 0  
 LB 1.00 Hz  
 GB 0  
 PC 1.40

LD NMR Plot parameters  
 CA 32768  
 CB 32768  
 FIP 24.000 cm  
 FI 23134.80 Hz  
 F2P -10.000 ppm  
 F2 -1006.13 Hz  
 HPCMH 9.58333 ppm/cm  
 HZCM 964.20544 Hz/cm

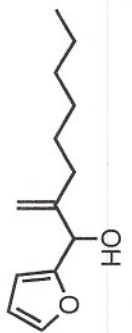

TES deprot 2-fur Apdt

Current Data Parameters  
 NAME hc98-5506a  
 EXPNO 1  
 PROCNO 1

F2 - Acquisition Parameters  
 Date\_ 20080822  
 Time 10.34  
 INSTRUM spect  
 PULPROG sm BRD BR-1  
 PILEPUS 2930  
 TO 65536  
 SELVENT CUC13  
 NS 2  
 DS 2  
 SFO1 400.1324710 MHz  
 FIDRES 0.125314 Hz  
 AQ 3.9584243 sec  
 RG 181  
 DW 50.400 usec  
 DE 5.00 usec  
 TE 300.0 K  
 D1 1.00000000 sec

\*\*\*\*\* CHANNEL f1 \*\*\*\*\*  
 NUC1 1H  
 P1 7.90 usec  
 PL1 0.00 dB  
 SFO1 400.1324710 MHz

F2 - Processing parameters  
 SI 32768  
 SF 400.1300000 MHz  
 EN 64  
 SSB 0  
 LB 0.30 Hz  
 GB 0  
 PC 1.00

1D NMR plot parameters  
 CX 24.00 cm  
 F1P 10.500 ppm  
 F1 4201.36 Hz  
 F2P -0.500 ppm  
 F2 -200.07 Hz  
 PRGCM 0.45833 ppm/cm  
 HZCM 83.39291 Hz/cm

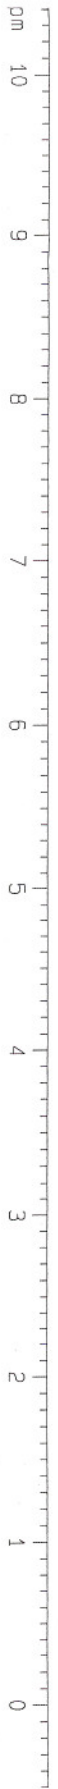

0.9802

1.0000  
0.9737

1.0100  
0.9710  
0.9912

3.0483

2.1242  
6.2567

3.0689

TES deprot 2-fur Apdt

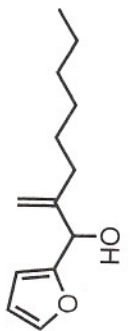

Current Data Parameters  
 NAME ncy8-2506A  
 EXPNO 2  
 PROCNO 1

F2 - Acquisition Parameters  
 Date\_ 20060822  
 Time 10.48  
 INSTRUM spect  
 PROBRD 5mm BBO BB-1  
 PULPROG zgpg30  
 TD 65536  
 SOLVENT CDCl3  
 NS 632  
 DS 4  
 SWH 24875.621 Hz  
 FIDRES 0.370672 Hz  
 AQ 1.317285 sec  
 RG 1625.5  
 DM 20.100 usec  
 DE 6.00 usec  
 TE 300.0 K  
 O1 2.00000000 sec  
 d11 0.03000000 sec  
 d12 0.00020000 sec

\*\*\*\*\* CHANNEL f1 \*\*\*\*\*  
 NUC1 13C  
 P1 15.28 usec  
 PL1 3.00 dB  
 SF01 100.6273959 MHz

\*\*\*\*\* CHANNEL f2 \*\*\*\*\*  
 CPDPRG2 waltz16  
 NUC2 1H  
 P2 14.00 usec  
 PL2 0.00 dB  
 PL12 24.00 dB  
 PL13 24.00 dB  
 SF02 400.1316005 MHz

F2 - Processing parameters  
 S1 32756  
 SF 100.6127499 MHz  
 WDM EH  
 SSB 0  
 LB 1.00 Hz  
 GB 0  
 PC 1.40

1D NMR tick parameters  
 C1 24.00 cm  
 F1 24.00 ppm  
 F2 21831.74 Hz  
 F2P -5.000 ppm  
 F2 -503.06 Hz  
 PPM2CM 9.16667 ppm/cm  
 HQCN 922.2851 Hz/cm

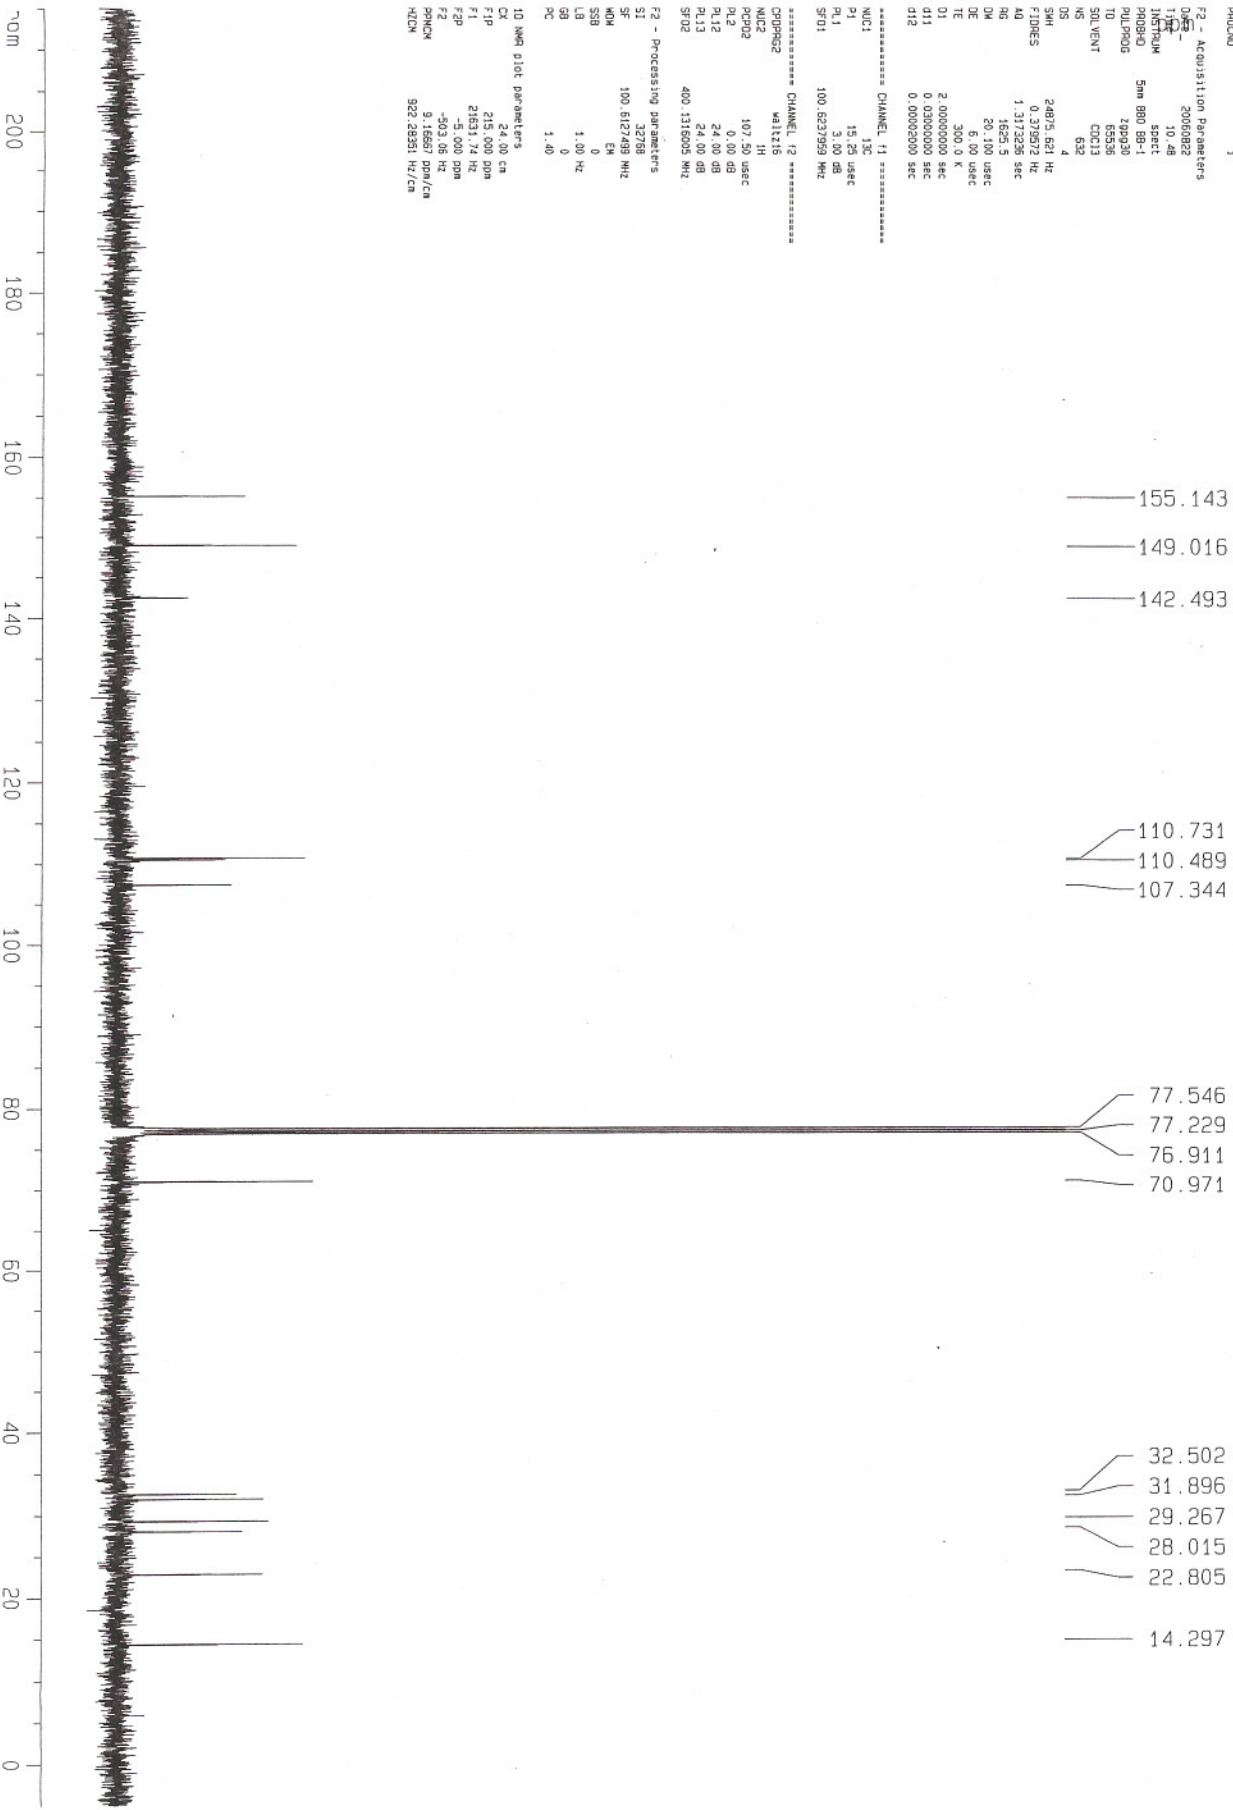

Supplement: NIHMS308270-supplement-Supporting_Information.pdf [file NIHMS308270-supplement-Supporting_Information.pdf]
